# Enhance Patient Care with These Essential TEXTBOOKS in PSYCHIATRY

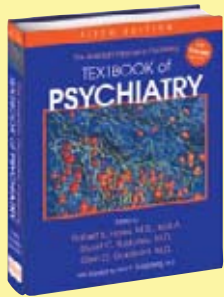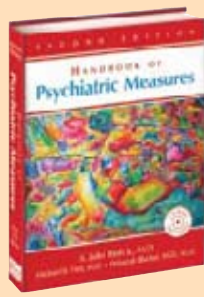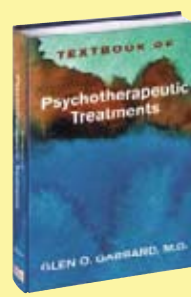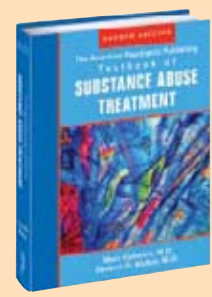

## The American Psychiatric Publishing Textbook of Psychiatry

*Edited by Robert E. Hales, M.D., M.B.A.,  
Stuart C. Yudofsky, M.D.,  
and Glen O. Gabbard, M.D.*

*With Foreword by  
Alan F. Schatzberg, M.D.*

*The American Psychiatric Publishing Textbook of Psychiatry* has been meticulously revised to maintain its preeminence as an accessible and authoritative educational reference and clinical compendium. More than 100 contributors—65 new to this edition—summarize the latest developments in psychiatry, with new chapters on cellular and molecular biology; neuroanatomy; human sexuality and sexual dysfunctions; nonpharmacological somatic treatments; supportive psychotherapy; combined psychotherapy and pharmacotherapy; treatment of gay, lesbian, bisexual, and transgender patients; and assessment of dangerousness.

## Handbook of Psychiatric Measures, Second Edition

*Edited by  
A. John Rush Jr., M.D.,  
Michael B. First, M.D., and  
Deborah Blacker, M.D., Sc.D.*

This book offers a concise summary of key evaluations that clinicians can use to enhance the quality of patient care. It contains more than 275 rating methods, from the Abnormal Involuntary Movement Scale to the Zung Self-Rating Depression Scale.

Forty measures have been added to the discussion and to the CD-ROM. In addition to reassessing measures for inclusion—adding measures that empirically provide better patient evaluation and subtracting measures that have been superseded. Costs, translations, and contact information for each measure have also been updated.

## Textbook of Psychotherapeutic Treatments

*Edited by Glen O. Gabbard, M.D.*

Glen O. Gabbard, author or editor of more than 22 books and over 280 scientific papers and book chapters, is a leader in the fields of psychiatry and psychoanalysis. He has assembled 50 of the world's most renowned experts in every psychotherapeutic school of thought to create this definitive volume, sure to become the standard text for all student and practicing psychotherapists, whatever their background—psychiatry, psychology, or social work.

Treatment outcome depends on carefully matching the therapeutic modality to the patient or client, and the *Textbook of Psychotherapeutic Treatments* will both facilitate and enhance that meticulous process. Up-to-date and scientifically rigorous, this book is the “go-to” reference for the conscientious psychotherapist.

## The American Psychiatric Publishing Textbook of Substance Abuse Treatment, Fourth Edition

*Edited by Marc Galanter, M.D., and  
Herbert D. Kleber, M.D.*

*This book* has been fully updated to present the most current scientific and clinical information on a wide range of substance use disorders, from tobacco and alcohol to methamphetamine and “club drug” abuse. It is a comprehensive guide to treatment written at a level appropriate to both experienced and new clinicians, reflecting the expertise of leading addiction specialists in psychiatry and allied fields. With most chapters extensively revised by new authors, it incorporates the latest biomedical research findings as well as recent advances in treatment modalities and the growth of pharmacotherapies.

2008 • 1,818 pages  
ISBN 978-1-58562-257-3  
Hardcover • \$285.00  
Item #62257

2008 • 864 pages  
ISBN 978-1-58562-218-4  
Hardcover • \$195.00  
Item #62218

2009 • 944 pages  
ISBN 978-1-58562-304-4  
Hardcover • \$95.00  
Item # 62304

2008 • 768 pages  
ISBN 978-1-58562-276-4  
Hardcover • \$165.00  
Item #62276

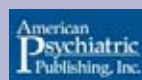

The First and Last Word in Psychiatry

Order Online: [www.appi.org](http://www.appi.org) • Phone: 1-800-368-5777 • Fax: 703-907-1091 • Email: [appi@psych.org](mailto:appi@psych.org)

Priority Code AH860



# ZYPREXA® (olanzapine)?

You wrote “ZYPREXA.”

Will your patient leave the pharmacy with something else?

With over 4,000 drugs on the market and more than 8 million prescriptions filled every day, medication errors can and do occur. For example, ZYPREXA and Zyrtec® (cetirizine HCl) have been mistaken, one for the other, in the past.

To help avoid such medication errors, the Institute for Safe Medication Practices (ISMP) recommends that physicians:

- Print the medication’s brand name and generic name on all prescriptions.
- Include dosage form, strength, and full instructions.
- Pronounce the name for the patient or caregiver, and have them say it back to you.
- Remind the patient to check for anything unusual (eg, capsules instead of the usual tablets) before they leave the pharmacy.

**Please take special care when prescribing any medication.**

**Millions of patients and their families are counting on you.**

OL33361 PRINTED IN USA. 3000103575 ©2005, ELI LILLY AND COMPANY. ALL RIGHTS RESERVED.  
ZYPREXA is a registered trademark of Eli Lilly and Company.  
Zyrtec is a registered trademark of UCB, Societe Anonyme.

# REALIZE THE POSSIBILITIES

*Gina, 37*

Real Patient, Manager

Diagnosis: Bipolar Disorder

Last Episode: Mixed

■ Effectively treats acute manic and mixed episodes

■ Well-established tolerability profile

GEODON is indicated for the treatment of acute manic or mixed episodes associated with bipolar disorder, with or without psychotic symptoms.

**Elderly patients with dementia-related psychosis treated with antipsychotic drugs are at an increased risk of death compared to placebo. GEODON is not approved for the treatment of patients with dementia-related psychosis.**

GEODON is contraindicated in patients with a known history of QT prolongation, recent acute myocardial infarction, or uncompensated heart failure, and should not be used with certain other QT-prolonging drugs. GEODON has been associated with prolongation of the QT<sub>c</sub> interval. In some drugs, QT prolongation has been associated with torsade de pointes, a potentially fatal arrhythmia. Patients who are at risk for electrolyte disturbances should have baseline measurements performed before initiating GEODON. Patients on diuretics should be monitored.

As with all antipsychotic medications, a rare and potentially fatal condition known as neuroleptic malignant syndrome (NMS) has been reported with GEODON. NMS can cause hyperpyrexia, muscle rigidity, diaphoresis, tachycardia, irregular pulse or blood pressure, cardiac dysrhythmia, and altered mental status. If signs and symptoms appear, immediate discontinuation, treatment, and monitoring are recommended.

■ Target 120–160 mg/day on Day 2

■ Initiate dosing at 80 mg/day with meals

Prescribing should be consistent with the need to minimize tardive dyskinesia (TD), a potentially irreversible dose- and duration-dependent syndrome. If signs and symptoms appear, discontinuation should be considered since TD may remit partially or completely.

Hyperglycemia-related adverse events, sometimes serious, have been reported in patients treated with atypical antipsychotics. There have been few reports of hyperglycemia or diabetes in patients treated with GEODON, and it is not known if GEODON is associated with these events. Patients treated with an atypical antipsychotic should be monitored for symptoms of hyperglycemia.

Precautions include the risk of rash, orthostatic hypotension, and seizures.

The most common adverse events associated with GEODON in bipolar mania were somnolence, extrapyramidal symptoms, dizziness, akathisia, and abnormal vision.

In short-term schizophrenia clinical trials, 10% of GEODON-treated patients experienced a weight gain of ≥7% of body weight vs 4% for placebo.

Individual results may vary.

Please see brief summary of prescribing information on adjacent page.

For more information, please visit [www.pfizerpro.com/GEODON](http://www.pfizerpro.com/GEODON)

**GEODON**<sup>®</sup>  
(ziprasidone HCl) Capsules

**BRIEF SUMMARY** See package insert for full prescribing information.

**Increased Mortality in Elderly Patients with Dementia-Related Psychosis**—Elderly patients with dementia-related psychosis treated with antipsychotic drugs are at an increased risk of death. Analyses of seven placebo-controlled trials (total duration of 10 weeks), largely in patients taking atypical antipsychotic drugs, revealed a risk of death in drug-treated patients of between 1.6 to 1.7 times the risk of death in placebo-treated patients. Over the course of a typical 10-week controlled trial, the rate of death in drug-treated patients was about 4.5%, compared to a rate of about 2.8% in the placebo group. Although the cause of death was varied, most of the deaths appeared to be either cardiovascular (e.g., heart failure, sudden death) or infectious (e.g., pneumonia) in nature. Observational studies suggest that, similar to atypical antipsychotic drugs, treatment with conventional antipsychotic drugs may increase mortality. The extent to which the findings of increased mortality in observational studies may be attributed to the antipsychotic drug as opposed to some characteristic(s) of the patients is not clear. Geodon (ziprasidone) is not approved for the treatment of patients with Dementia-Related Psychosis (see WARNINGS).

**INDICATIONS**—Geodon Capsules is indicated for the treatment of schizophrenia and acute manic or mixed episodes associated with bipolar disorder with or without psychotic features. Geodon (ziprasidone mesylate) for injection is indicated for acute agitation in schizophrenic patients.

**CONTRAINDICATIONS**—QT Prolongation Because of GEODON's dose-related prolongation of the QT interval and the known association of fatal arrhythmias with QT prolongation by some other drugs, GEODON is contraindicated in patients with a known history of QT prolongation (including congenital long QT syndrome), with recent acute myocardial infarction, or with uncorrected heart failure (see WARNINGS). Pharmacokinetic/pharmacodynamic studies between GEODON and other drugs that prolong the QT interval have not been performed. An additive effect of GEODON and other drugs that prolong the QT interval cannot be excluded. Therefore, GEODON should not be given with dronedarone, sotalol, quinidine, other Class I and III anti-arrhythmics, mesoridazine, thioridazine, chlorpromazine, droperidol, pimozide, sparfloxacin, gatifloxacin, moxifloxacin, halofentanyl, meprobamate, penfluridone, arsenic trioxide, levomefemtrazole, dabigatran, or metoprolol. In addition, GEODON is also contraindicated with drugs that have demonstrated QT prolongation as one of their pharmacodynamic effects, and has a potential effect described in the full prescribing information as a contraindication or a warning label warning (see WARNINGS). GEODON is contraindicated in individuals with a known hypersensitivity to the product. **WARNINGS**—**Increased Mortality in Elderly Patients with Dementia-Related Psychosis** Elderly patients with dementia-related psychosis treated with antipsychotic drugs are at an increased risk of death. GEODON (ziprasidone) is not approved for the treatment of patients with dementia-related psychosis (see BOXED WARNING). **QT Prolongation and Risk of Sudden Death** GEODON use should be avoided in combination with other drugs that are known to prolong the QT interval. Additionally, clinicians should be alert to the identification of other drugs that have been consistently observed to prolong the QT interval. Such drugs should not be prescribed with GEODON. A study directly comparing the QT/QTc-prolonging effect of GEODON with several other drugs effective in the treatment of schizophrenia was conducted in patient volunteers. The mean increase in QTc from baseline for GEODON ranged from approximately 9 to 14 msec greater than for the comparator drugs (risperidone, olanzapine, aripiprazole, and haloperidol), but was approximately 14 msec less than the prolongation observed for risperidone. In this study, the effect of GEODON on QTc length was not augmented by the presence of a metabolic inhibitor (ketoconazole 200 mg bid). In placebo-controlled trials, GEODON increased the QTc interval compared to placebo by approximately 10 msec at the highest recommended daily dose of 160 mg. In clinical trials, the electrocardiograms of 2,293 (0.26%) GEODON patients and 1,440 (0.23%) placebo patients revealed QTc intervals exceeding the potentially clinically relevant threshold of 500 msec. In the GEODON patients, neither case suggested a role of GEODON. Some drugs that prolong the QTc interval have been associated with the occurrence of torsades de pointes and with sudden unexpected death. The relationship of QTc prolongation to torsades de pointes is unclear for larger increases (20 msec and greater) but it is possible that smaller QTc/QT prolongations may also increase risk, or increase it in susceptible individuals, such as those with hypokalemia, hypomagnesemia, or genetic predisposition. Although torsades de pointes has not been observed in association with the use of GEODON at recommended doses in premarketing studies, experience is too limited to rule out an increased risk. A study evaluating the QT/QTc-prolonging effect of intramuscular GEODON, with intramuscular haloperidol as a control, was conducted in patient volunteers. In the trial, ECGs were obtained at the time of maximum plasma concentration following two injections of GEODON (20 mg then 30 mg) or haloperidol (7.5 mg then 10 mg) given four hours apart. Note that a 30 mg dose of intramuscular GEODON is 50% higher than the recommended therapeutic dose. The mean change in QTc from baseline was calculated for each drug using a simple base-corrected correction that removes the effect of heart rate on the QT interval. The mean increase in QTc from baseline for GEODON was 4.6 msec following the first injection and 12.8 msec following the second injection. The mean increase in QTc from baseline for haloperidol was 6.0 msec following the first injection and 14.7 msec following the second injection. In this study, no patient had a QTc interval exceeding 500 msec. As with other antipsychotic drugs and placebo, sudden unexpected deaths have been reported in patients taking GEODON at recommended doses. The premarketing experience for GEODON did not reveal an excess of mortality for GEODON compared to other antipsychotic drugs or placebo, but the extent of exposure was limited, especially for the drugs used as active comparators and placebo. Nevertheless, GEODON's larger prolongation of QTc length compared to several other antipsychotic drugs raises the possibility that the risk of sudden death may be greater for GEODON than for other available drugs for treating schizophrenia. This possibility needs to be considered in deciding among alternative drug products. Certain circumstances may increase the risk of the occurrence of torsades de pointes and/or sudden death in association with the use of drugs that prolong the QTc interval, including (1) bradycardia, (2) hypokalemia or hypomagnesemia, (3) concomitant use of other drugs that prolong the QTc interval, and (4) presence of congenital prolongation of the QT interval. GEODON should also be avoided in patients with congenital long QT syndrome and in patients with a history of cardiac arrhythmias (see CONTRAINDICATIONS, and see Drug Interactions under PRECAUTIONS). It is recommended that patients being considered for GEODON treatment who are at risk for significant electrolyte disturbances, hypokalemia in particular, have baseline serum potassium and magnesium measurements. Hypokalemia (and/or hypomagnesemia) may increase the risk of QT prolongation and arrhythmia. Hypokalemia may result from diuretic therapy, diarrhea, and other causes. Patients with low serum potassium and/or magnesium should be repleted with those electrolytes before proceeding with treatment. It is essential to periodically monitor serum electrolytes in patients for whom diuretic therapy is introduced during GEODON treatment. Periodically prolonged QTc intervals may also increase the risk of further prolongation and arrhythmia, but it is not clear that routine screening ECG measures are effective in detecting such patients. Rather, GEODON should be avoided in patients with histories of significant cardiovascular illness, e.g., QT prolongation, recent acute myocardial infarction, uncompensated heart failure, or cardiac arrhythmia. GEODON should be discontinued in patients who are found to have persistent QTc measurements >500 msec. **Neuroleptic Malignant Syndrome (NMS)**: A potentially fatal symptom complex sometimes referred to as Neuroleptic Malignant Syndrome (NMS) has been reported in association with administration of antipsychotic drugs. The management of NMS should include: (1) immediate discontinuation of antipsychotic drugs and other drugs not essential to concurrent therapy, (2) intensive symptomatic treatment and medical monitoring, and (3) treatment of any concurrent serious medical problems for which specific treatments are available. If a patient requires antipsychotic drug treatment after recovery from NMS, the potential neurotoxicity of drug therapy should be carefully considered. The patient should be carefully monitored. Serious toxicities of NMS have been reported. **Tardive Dyskinesia (TD)**: A syndrome of potentially irreversible, involuntary, dyskinetic movements may develop in patients undergoing long-term (antipsychotic) drugs. Although the prevalence of TD appears to be highest among the elderly, especially elderly women, it is impossible to rely upon prevalence estimates to predict, at the inception of antipsychotic treatment, which patients are likely to develop TD. Its signs and symptoms of TD appear in patients on GEODON, drug discontinuation should be considered. **Hyperglycemia and Diabetes Mellitus**: Hyperglycemia-related adverse events, sometimes serious, have been reported in patients treated with atypical antipsychotics. There have been few reports of hyperglycemia or diabetes in patients treated with GEODON, and it is not known if GEODON is associated with these events. Patients treated with an atypical antipsychotic should be monitored for symptoms of hyperglycemia. **PRECAUTIONS**—**General**: In premarketing trials, about 5% of GEODON patients developed rash and/or urticaria, with discontinuation of treatment in about one-sixth of these cases. The occurrence of rash/dose-related allergic the finding might also be explained by longer exposure in higher-dose patients. Several patients with rash/dose-related signs and symptoms of associated systemic illness, e.g., elevated WBCs. Most patients improved promptly upon treatment with antihistamines or steroids and/or upon discontinuation of GEODON, and all patients were reported to recover completely. Upon appearance of rash for which an alternative etiology cannot be identified, GEODON should be discontinued. **Orthostatic Hypotension**: GEODON may induce orthostatic hypotension associated with dizziness, tachycardia, and, in some patients, syncope, especially during the initial dose-escalation period, probably reflecting its  $\alpha_1$ -adrenoreceptor antagonist properties. Syncope was reported in 0.6% of GEODON patients. GEODON should be used with particular caution in patients with known cardiovascular disease (history of myocardial infarction or ischemic heart disease, heart failure or conduction abnormalities), cerebrovascular disease or conditions that would predispose patients to hypotension (dehydration, hypovolemia, and treatment with antihypertensive medications). **Seizures**: In clinical trials, seizures occurred in 0.4% of GEODON patients. There were confounding factors that may have contributed to seizures in many of these cases. As with other antipsychotic drugs, GEODON should be used cautiously in patients with a history of seizures or with conditions that potentially lower the seizure threshold, e.g., Alzheimer's dementia. Conditions that lower the seizure threshold may be more prevalent in a population of 65 years or older. **Dysphagia**: Esophageal dysmotility and aspiration have been associated with antipsychotic drug use. Aspiration pneumonia is a common cause of morbidity and mortality in elderly patients, in particular those with advanced Alzheimer's dementia, and GEODON and other antipsychotic drugs should be used cautiously in patients at risk for aspiration pneumonia. **(See also Boxed Warning: Increased Mortality in Elderly Patients with Dementia-Related Psychosis)** **Hypersensitivity Reactions**: As with other drugs that antagonize dopamine D<sub>2</sub> receptors, GEODON evokes protein reactions in humans. Toxicologic experiments indicate that approximately one-third of human breast cancers are prolactin-dependent in vitro, a factor of potential importance if the prescription of these drugs is contemplated in a patient with previously detected breast cancer. Neither clinical studies nor epidemiologic studies conducted to date have shown an association between chronic administration of this class of drugs and benign prostatic hyperplasia; the available evidence is considered too limited to be conclusive at this time. **Potential for Cognitive and Motor Impairment**: Somnolence was a commonly reported adverse event in GEODON patients. In the 8- and 6-week placebo-controlled trials, somnolence was reported in 14% of GEODON patients vs. 7% of placebo patients. Somnolence led to discontinuation in 0.3% of patients in short-term clinical trials. Since GEODON has the potential to impair judgment, thinking, or motor skills, patients should be cautioned about performing activities requiring mental alertness, such as operating a motor vehicle (including a motorcycle) or operating hazardous machinery until they are reasonably certain that GEODON therapy does not affect them adversely. **Priapism**: One case of priapism was reported in the premarketing database. **Body Temperature Regulation**: Although not reported with GEODON in premarketing trials, disruption of the body's ability to reduce core body temperature has been attributed to antipsychotic agents. **Suicide**: The possibility of a suicide attempt is inherent in psychotic illness, and close supervision of high-risk patients should accompany their therapy. GEODON prescriptions should be written for the smallest quantity of capsules consistent with good patient management to reduce overdose risk. **Use in Patients with Concomitant Illness**: Clinical experience with GEODON in patients with certain concomitant systemic illnesses is limited. GEODON has not been evaluated or used to any appreciable extent in patients with a recent history of myocardial infarction or unstable heart disease. Patients with these diagnoses were excluded from premarketing clinical studies. Because of the risk of QTc prolongation and orthostatic hypotension with GEODON, caution should be observed in cardiac patients (see **QT Prolongation and Risk of Sudden Death** and **WARNINGS** and **Orthostatic Hypotension** in **PRECAUTIONS**). **Information for Patients**: To ensure safe and effective use of GEODON, the

information and instructions in the Patient Information Statement should be discussed with patients. **Laboratory Tests**: Patients being considered for GEODON treatment who are at risk of significant electrolyte disturbances should have baseline serum potassium and magnesium measurements. Low serum potassium and magnesium should be repleted before treatment. Patients who are started on diuretics during GEODON therapy have periodic monitoring of serum potassium and magnesium. Discontinue GEODON in patients who are found to have persistent QTc measurements >500 msec (see **WARNINGS: Drug Interactions**). (1) GEODON should not be used with any drug that prolongs the QT interval. (2) Avoid the primary CNS effects of GEODON. Caution should be used when it is taken in combination with other centrally acting drugs. (3) Because of the potential for inducing hypotension, GEODON may enhance the effects of certain antihypertensive agents. (4) GEODON may antagonize the effects of levodopa and dopamine agonists. **Effect of Other Drugs on GEODON**: Carbamazepine, 200 mg bid for 21 days, increased the AUC and  $C_{max}$  of GEODON by about 35% in the AUC of GEODON. Ketozonazole, a potent inhibitor of CYP3A4, 200 mg bid for 7 days, increased the AUC and  $C_{max}$  of GEODON by about 35%–40%. Cimetidine, 800 mg qd for 2 days, did not affect GEODON pharmacokinetics. Coadministration of 20 mg of Metoprolol did not affect GEODON pharmacokinetics. Population pharmacokinetic analysis of schizophrenic patients in controlled clinical trials has not revealed any clinically significant pharmacokinetic interactions with benzodiazepines, tricyclic antidepressants, or lithium. Effect of GEODON on Other Drugs: *In vitro* studies revealed little potential for GEODON to interfere with the metabolism of drugs cleared primarily by CYP2D6, CYP2C9, CYP2C19, CYP3A4, and CYP3A5, and little potential for drug interactions with GEODON due to displacement. GEODON 40 mg bid administered concomitantly with morphine 450 mg bid for 7 days did not affect the steady-state level or renal clearance of lithium. GEODON 20 mg bid did not affect the pharmacokinetics of concomitantly administered oral carbazepine, diazepam, etomidate (0.63 mg) and levoropaclopril (0.15 mg). Consistent with *in vitro* results, a study in normal healthy volunteers showed that GEODON did not alter the metabolism of alevonephthalazine (a CYP2D6 model substrate, for major metabolic biotransformation). There was no statistically significant change in the urinary dihydrodiphenhydramine-to-diphenhydramine ratio. **Carcinogenesis, Mutagenesis, Impairment of Fertility**: Lifetime carcinogenicity studies were conducted with GEODON in Long Evans rats and CD-1 mice. In male mice, there was a slight increase in incidence of tumors relative to controls. In female mice there were dose related increases in the incidences of pituitary gland adenoma and carcinoma, and mammary gland adenocarcinoma in all doses tested. Increases in serum prolactin were observed in a 13-month dietary study in female, but not male, mice. GEODON had no effect on serum prolactin in rats in a 5-week dietary study at the doses that were used in the carcinogenicity study. The relevance for human risk of the findings of prolactin-mediated endocrine tumors in rodents is unknown (see **Hyperproliferation**). **Mutagenesis**: There was a reproducible mutagenic response in the Ames assay in one strain of *S. typhimurium* in the absence of metabolic activation. Positive results were obtained in both the *in vitro* mammalian cell gene mutation assay and the *in vivo* chromosomal aberration assay in human lymphocytes. **Impairment of Fertility**: GEODON increased time to copulation in Sprague-Dawley rats in two fertility and early embryonic development studies at doses of 10 to 160 mg/kg/day (0.5 to 8 times the MPO-d of 200 mg/day on a mg/m<sup>2</sup> basis). Fertility rate was reduced at 160 mg/kg/day (8 times the MPO-d of 200 mg/day) but increased on rebirth at 40 mg/kg/day (2 times the MPO-d on a mg/m<sup>2</sup> basis). The fertility of female rats was reduced. **Pregnancy**: **Pregnancy Category C**: There are no adequate and well-controlled studies in pregnant women. GEODON should be used during pregnancy only if the potential benefit justifies the potential risk to the fetus. **Labor and Delivery**: The effect of GEODON on labor and delivery in humans is unknown. **Nursing Mothers**: It is not known whether, and if so in what amount, GEODON or its metabolites are excreted in human milk. It is recommended that women receiving GEODON should not breast feed. **Pediatric Use**: The safety and effectiveness of GEODON in pediatric patients have not been established. **Geriatric Use**: Of the approximately 5,000 patients treated with GEODON in clinical studies, 2.4% (189) were 65 years of age or older. In general, there was no indication of any different tolerability for GEODON or of reduced clearance of GEODON in the elderly compared to younger adults. Nevertheless, the presence of multiple factors that might increase the pharmacodynamic response to GEODON, or cause poorer tolerance or orthostasis, should lead to consideration of a lower starting dose, slower titration, and careful monitoring during the initial dosing period for some elderly patients. **ADVERSE REACTIONS—Adverse Effects Observed in Short-Term, Placebo-Controlled Trials**: The following findings are based on the short-term placebo-controlled premarketing trials for schizophrenia (a period of two 6-week, and two 4-week fixed-dose trials) and bipolar mania (a pool of two 2-week flexible-dose trials) in which GEODON was administered in doses ranging from 10 to 200 mg/day. **Adverse Events Associated with Discontinuation**: Schizophrenia: Approximately 4.1% (29/702) of GEODON-treated patients in short-term placebo-controlled studies discontinued treatment due to an adverse event, compared with about 2.2% (6/273) on placebo. The most common event associated with dropout was rash, including 7 dropouts for rash among GEODON patients (1%) compared to no placebo patients (see **PRECAUTIONS**: Bipolar Mania). Approximately 5.5% (18/279) of GEODON-treated patients in short-term, placebo-controlled studies discontinued treatment due to an adverse event, compared with about 3.7% (13/336) on placebo. The most common events associated with dropout in the GEODON-treated patients were akathisia, anxiety, depression, dizziness, dystonia, rash, and vomiting, with 2 dropouts for each of these events among GEODON patients (1%) compared to one placebo patient each for dystonia and rash (1%) and no placebo patients for the remaining adverse events. **Adverse Events at an Incidence ≥5% and at Least Twice the Rate of Placebo**: The most commonly observed adverse events associated with GEODON in schizophrenia trials were somnolence (14%) and respiratory tract infection (8%). The most commonly observed adverse events associated with the use of GEODON in bipolar mania trials were somnolence (21%), extrapyramidal symptoms (21%), dizziness (18%), akathisia (10%), abnormal vision (8%), asthma (8%), and vomiting (5%). The following list enumerates the treatment-emergent adverse events that occurred during acute therapy, including only those events that occurred in 2% of GEODON patients and at a greater incidence than in placebo. Schizophrenia: *Body as a Whole*—asthenia, asthenic syndrome, chest pain, *Cardiovascular*—tachycardia, *Digestive*—nausea, constipation, dyspepsia, diarrhea, dry mouth, anorexia, *Neurology*—extrapyramidal symptoms, somnolence, akathisia, *Disturbance*—respiratory—respiratory tract infection, rhinitis, cough increased, *Skin and Appendages*—rash, fungal dermatitis, *Special Senses*—abnormal vision, *Bipolar Mania: Body as a Whole*—headache, asthma, accidental injury, *Cardiovascular*—hypertension, *Digestive*—nausea, diarrhea, dyspepsia, vomiting, increased salivation, tongue edema, dysphagia, *Musculoskeletal*—myalgia, *Nervous System*—somnolence, extrapyramidal symptoms, dizziness, akathisia, anxiety, hypokinesia, speech disorder, *Respiratory*—rhinitis, *Skin and Appendages*—fungal dermatitis, *Special Senses*—abnormal vision, **Dose Dependency**: An analysis for dose response in the schizophrenia trials revealed an apparent relation of adverse event to dose for the following: asthenia, postural hypotension, anorexia, dry mouth, increased salivation, arthralgia, anxiety, dizziness, dystonia, hypertension, somnolence, tremor, rhinitis, rash, and abnormal vision. **Extrapyramidal Symptoms (EPS)**: The incidence of reported EPS for GEODON patients in the short-term, placebo-controlled schizophrenia trials was 14% vs 8% for placebo. Objectively collected data from those trials on the Simpson-Angus Rating Scale and the Barnes Akathisia Scale did not generally show a difference between GEODON and placebo. **Dystonia**: Postural abnormal contractions of the muscles of the arms or other susceptible individuals during the first few days of treatment. Dystonia may occur at any dose level but with greater frequency and severity with high potency and at higher doses of first-generation antipsychotic drugs. Elevated risk is observed in males and younger age groups. **Worst Sign Changes**: GEODON is associated with orthostatic hypotension (see **PRECAUTIONS**). **Weight Gain**: In short-term schizophrenia trials, the proportions of patients meeting a weight gain criterion of 7% of body weight were compared, revealing a statistically significantly greater incidence of weight gain for GEODON patients (10%) vs placebo patients (4%). A median weight gain of 0.5 kg was observed in GEODON patients vs 0.0 kg in placebo patients. Weight gain was reported as an adverse event in 0.4% of both GEODON and placebo patients. During long-term therapy with GEODON, a categorization of patients at baseline on the basis of body mass index (BMI) showed the greatest mean weight gain and the highest incidence of clinically significant weight gain (≥7% of body weight) in patients with a low BMI (<25) compared to normal (23-27) or overweight (>27) patients. There was a mean weight gain of 1.4 kg for patients with a "low" baseline BMI, 0.0 kg for patients with a "normal" BMI, and a 1.3 kg mean weight loss for patients with a "high" BMI. **ECG Changes**: GEODON is associated with an increase in the QTc interval (see **WARNINGS**). In schizophrenia trials, GEODON was associated with a mean increase in heart rate of 1.4 beats per minute compared to a 0.2 beats per minute decrease among placebo patients. **Other Adverse Events Observed During the Preliminary Evaluation of GEODON**: Frequent adverse events are those occurring in at least 1/100 patients; infrequent adverse events are those occurring in 1/100 to 1/1000 patients; rare events are those occurring in fewer than 1/1000 patients. Schizophrenia: *Body as a Whole*—frequent: abdominal pain, flu syndrome, fever, accidental fall, face edema, chills, photosensitivity reaction, flank pain, hyperhidrosis, motor vehicle accident, *Cardiovascular System*—frequent: tachycardia, hypertension, postural hypotension, infrequent: bradycardia, angina pectoris, atrial fibrillation, Rare: first-degree AV block, bundle branch block, phlebitis, pulmonary embolism, cardiomyopathy, cerebral infarct, cerebrovascular accident, deep thrombophlebitis, myocarditis, thrombophlebitis, *Digestive System*—frequent: anorexia, vomiting, infrequent: rectal hemorrhage, dysphagia, tongue edema, Rare: gum hemorrhage, jaundice, liver irritation, gastric duodenal ulcers/increased hematemesis, cholelithiasis, hepatitis, hepatomegaly, leukoplakia of mouth, fatty liver deposit, melena, *Endocrine*—Rare: hypothyroidism, hyperthyroidism, myxedema, *Hemic and Lymphatic System*—infrequent: anemia, echthymosis, leukopenia, eosinophilia, lymphadenopathy, Rare: thrombocytopenia, hypochromic anemia, lymphohistiocytosis, monocytes, basophilia, lymphedema, polycythemia, thrombocytopenia, *Metabolic and Nutritional Disorders*—infrequent: thirst, transaminase increased, peripheral edema, hyperglycemia, creatine phosphokinase increased, alkaline phosphatase increased, hypophosphatemia, dehydration, lactic dehydrogenase increased, *Aluminum* hypokalemia, Rare: BUN increased, creatinine increased, hypernatremia, hypochloremia, hyperkalemia, hypochloremia, hypoglycemia, hyponatremia, hypomagnesemia, ketosis, respiratory alkalosis, *Musculoskeletal System*—frequent: myalgia, infrequent: tenosynovitis, Rare: myopathy, *Nervous System*—frequent: agitation, extrapyramidal symptoms, tremor, dystonia, hypertension, dyskinesia, laryngitis, hiccups, psychosis, confusion, vertigo, hyperkinesia, hypokinesia, abnormal gait, ataxic gait, cerebellar ataxia, anorexia, cogwheel rigidity, delirium, hypotonia, akathisia, dysuria, *Eye*—infrequent: conjunctivitis, conjunctival hyperemia, conjunctivitis, *Genitourinary System*—infrequent: priapism, *Respiratory System*—frequent: cough, frequent: pneumonia, epistaxis, Rare: hemoptysis, aryanism, *Skin and Appendages*—infrequent: maculopapular rash, urticaria, alopecia, eczema, exfoliative dermatitis, contact dermatitis, vesiculobullous rash, *Special Senses*—frequent: fungal dermatitis, infrequent: conjunctivitis, dry eyes, lacrimal hypersecretion, catarrh, phlebotomy, Rare: eye hemorrhage, visual field defect, keratitis, keratoconjunctivitis, *Urinary System*—infrequent: impotence, abnormal ejaculation, amenorrhea, hematuria, micturition, micturition, polyuria, urinary retention, metrorrhagia, male sexual dysfunction, anorgasmia, glycosuria, Rare: glycosuria, vaginal hemorrhage, nocturia, oliguria, female sexual dysfunction, uterine hemorrhage, **Adverse Events Observed in Trials of Intramuscular GEODON**: In these trials, the most commonly observed adverse events associated with the use of intramuscular GEODON (25%) and observed at a rate on intramuscular GEODON (in the higher dose groups) at least twice that of the lowest intramuscular GEODON group were headache (13%), nausea (12%), and somnolence (20%). **Adverse Events at an Incidence ≥1% in Short-Term Fixed-Dose Intramuscular Trials**: The following list enumerates the treatment-emergent adverse events that occurred in ≥1% of intramuscular GEODON patients (in the higher dose groups) and at least twice that of the lowest intramuscular GEODON group. *Body as a Whole*—headache, injection site pain, asthma, abdominal pain, flu syndrome, back pain, *Cardiovascular*—postural hypotension, hypertension, bradycardia, vasodilation, *Digestive*—nausea, rectal hemorrhage, diarrhea, vomiting, dyspepsia, anorexia, constipation, tooth disorder, dry mouth, *Nervous System*—dizziness, anxiety, somnolence, akathisia, agitation, extrapyramidal symptoms, hypotonia, cogwheel rigidity, psychosis, personality disorder, psychotic, speech disorder, *Respiratory*—rhinitis, *Skin and Appendages*—fungal dermatitis, sweating, *Urinary System*—glycosuria, proteinuria, **DRUG ABUSE AND DEPENDENCE—Controlled Substance Class**: GEODON is not a controlled substance. **OVERDOSE**:—In premarketing trials in over 5,400 patients, accidental or intentional overdose of GEODON was documented in 10 patients. All patients survived without sequelae. In the patient taking the largest confirmed amount (3240 mg), the only symptoms reported were minimal sedation, slurring of speech, and transient hypotension (BP 20/95).

© 2008 August 2008

# Control acute agitation with **GEODON**<sup>®</sup> for *Injection* (ziprasidone mesylate)

*In schizophrenia. . .*

## Rapid control\* with low EPS<sup>1-4</sup>

- Low incidence of movement disorders<sup>1-4</sup>
- Smooth transition, with continued improvement, from IM to oral therapy<sup>3,4</sup>
- May be used concomitantly with benzodiazepines<sup>2,3,5</sup>

\* In 2 pivotal studies vs control, significance was achieved at the 2-hour primary end point (10 mg study) and at the 4-hour primary end point (20 mg study).

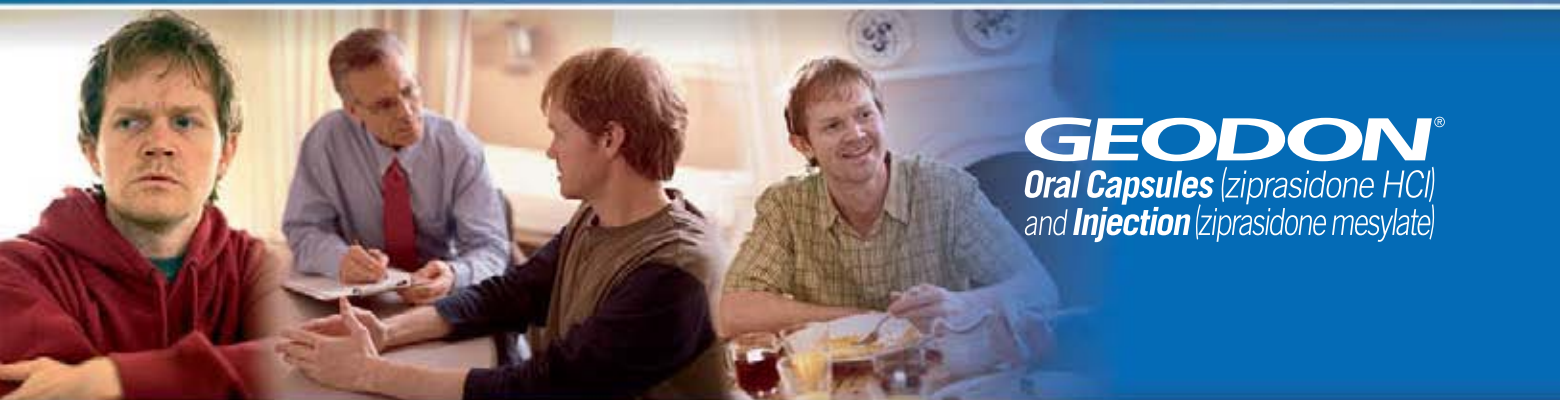

**GEODON**<sup>®</sup>  
*Oral Capsules* (ziprasidone HCl)  
and *Injection* (ziprasidone mesylate)

GEODON for Injection is indicated for the treatment of acute agitation in schizophrenic patients for whom treatment with GEODON is appropriate and who need intramuscular antipsychotic medication for rapid control of the agitation.

**Elderly patients with dementia-related psychosis treated with atypical antipsychotic drugs are at an increased risk of death compared to placebo. GEODON is not approved for the treatment of patients with dementia-related psychosis.**

**GEODON is contraindicated in patients with a known history of QT prolongation, recent acute myocardial infarction, or uncompensated heart failure, and should not be used with other QT-prolonging drugs. GEODON has a greater capacity to prolong the QT<sub>c</sub> interval than several antipsychotics. In some drugs, QT prolongation has been associated with torsade de pointes, a potentially fatal arrhythmia. In many cases this would lead to the conclusion that other drugs should be tried first.**

As with all antipsychotic medications, a rare and potentially fatal condition known as neuroleptic malignant syndrome (NMS) has been reported with GEODON. NMS can cause hyperpyrexia, muscle rigidity, diaphoresis, tachycardia, irregular pulse or blood pressure, cardiac dysrhythmia, and altered mental status. If signs and symptoms appear, immediate discontinuation, treatment, and monitoring are recommended.

Prescribing should be consistent with the need to minimize tardive dyskinesia (TD), a potentially irreversible dose- and duration-dependent syndrome. If signs and symptoms appear, discontinuation should be considered since TD may remit partially or completely.

Hyperglycemia-related adverse events, sometimes serious, have been reported in patients treated with atypical antipsychotics. There have been few reports of hyperglycemia or diabetes in patients treated with GEODON, and it is not known if GEODON is associated with these events. Patients treated with an atypical antipsychotic should be monitored for symptoms of hyperglycemia.

Precautions include the risk of rash, orthostatic hypotension, and seizures.

In fixed-dose, pivotal studies, the most commonly observed adverse events associated with the use of GEODON for Injection (incidence  $\geq 5\%$ ) and observed at a rate in the higher GEODON dose groups (10 mg, 20 mg) of at least twice that of the lowest GEODON dose group (2 mg control) were somnolence (20%), headache (13%), and nausea (12%).

*Please see brief summary of prescribing information on adjacent page.*

**BRIEF SUMMARY.** See package insert for full prescribing information.

**Increased Mortality in Elderly Patients with Dementia-Related Psychosis:** Elderly patients with dementia-related psychosis treated with atypical antipsychotic drugs are at an increased risk of death compared to placebo. Analyses of seven relevant placebo-controlled trials (modal duration of 10 weeks) in these patients revealed a risk of death in the drug-treated patients of between 1.6 to 1.7 times that seen in placebo-treated patients. Over the course of a typical 10 week controlled trial, the rate of death in drug-treated patients was about 4.5%, compared to a rate of about 2.6% in the placebo group. Although the causes of death were varied, most of the deaths appeared to be either cardiovascular (e.g., heart failure, sudden death) or infectious (e.g., pneumonia) in nature. GEODON (ziprasidone) is not approved for the treatment of patients with Dementia-Related Psychosis.

**INDICATIONS—GEODON Capsules is indicated for the treatment of schizophrenia and acute manic or mixed episodes associated with bipolar disorder with or without psychotic features. GEODON<sup>®</sup> (ziprasidone mesylate) for injection is indicated for acute agitation in schizophrenic patients.**

**CONTRAINDICATIONS—QT Prolongation:** Because of GEODON's dose-related prolongation of the QT interval and the known association of fatal arrhythmias with QT prolongation by some other drugs, GEODON is contraindicated in patients with a known history of QT prolongation (including congenital long QT syndrome), with recent acute myocardial infarction, or with uncompensated heart failure (see **WARNINGS**). Pharmacokinetic/pharmacodynamic studies between GEODON and other drugs that prolong the QT interval have not been performed. An additive effect of GEODON and other drugs that prolong the QT interval cannot be excluded. Therefore, GEODON should not be given with dofetilide, sotalol, quinidine, other Class Ia and III antiarrhythmics, mesoridazine, thioridazine, chlorpromazine, droperidol, pimozide, sparfloxacin, gatifloxacin, moxifloxacin, halofantrine, mefloquine, pentamidine, arsenic trioxide, levomethadylacetate, dolasetron mesylate, probucol, or tacrolimus. GEODON is also contraindicated with drugs that have demonstrated QT prolongation as one of their pharmacodynamic effects and have this effect described in the full prescribing information as a contraindication or a boxed or bolded warning (see **WARNINGS**). GEODON is contraindicated in individuals with a known hypersensitivity to the product. **WARNINGS—Increased Mortality in Elderly Patients with Dementia-Related Psychosis:** Elderly patients with dementia-related psychosis treated with atypical antipsychotic drugs are at an increased risk of death compared to placebo. GEODON (ziprasidone) is not approved for the treatment of patients with dementia-related psychosis (see **Boxed Warning**). **QT Prolongation and Risk of Sudden Death:** GEODON use should be avoided in combination with other drugs that are known to prolong the QT interval. Additionally, clinicians should be alert to the identification of other drugs that have been consistently observed to prolong the QT interval. Such drugs should not be prescribed with GEODON. A study directly comparing the QT/QTc-prolonging effect of GEODON with several other drugs effective in the treatment of schizophrenia was conducted in patient volunteers. The mean increase in QTc from baseline for GEODON ranged from approximately 9 to 14 msec greater than for four of the comparator drugs (risperidone, olanzapine, quetiapine, and haloperidol), but was approximately 14 msec less than the prolongation observed for thioridazine. In this study, the effect of GEODON on QTc length was not augmented by the presence of a metabolic inhibitor (ketoconazole 200 mg bid). In placebo-controlled trials, GEODON increased the QTc interval compared to placebo by approximately 10 msec at the highest recommended daily dose of 160 mg. In clinical trials the electrocardiograms of 2/2988 (0.06%) GEODON patients and 1/440 (0.23%) placebo patients revealed QTc intervals exceeding the potentially clinically relevant threshold of 500 msec. In the GEODON patients, neither case suggested a role of GEODON. Some drugs that prolong the QT/QTc interval have been associated with the occurrence of torsade de pointes and with sudden unexplained death. The relationship of QT prolongation to torsade de pointes is clearest for larger increases (20 msec and greater) but it is possible that smaller QT/QTc prolongations may also increase risk, or increase it in susceptible individuals, such as those with hypokalemia, hypomagnesemia, or genetic predisposition. Although torsade de pointes has not been observed in association with the use of GEODON at recommended doses in premarketing studies, experience is too limited to rule out an increased risk. A study evaluating the QT/QTc-prolonging effect of intramuscular GEODON, with intramuscular lorazepam as a control, was conducted in patient volunteers. In the trial, ECGs were obtained at the time of maximum plasma concentration following two injections of GEODON (20 mg then 30 mg) or haloperidol (7.5 mg then 10 mg) given four hours apart. Note that a 30 mg dose of intramuscular GEODON is 50% higher than the recommended therapeutic dose. The mean change in QTc from baseline was calculated for each drug using a sample-based correction that removes the effect of heart rate on the QT interval. The mean increase in QTc from baseline for GEODON was 4.6 msec following the first injection and 12.8 msec following the second injection. The mean increase in QTc from baseline for haloperidol was 6.0 msec following the first injection and 14.7 msec following the second injection. In this study, no patient had a QTc interval exceeding 500 msec. As with other antipsychotic drugs and placebo, sudden unexplained deaths have been reported in patients taking GEODON at recommended doses. The premarketing experience for GEODON did not reveal an excess of mortality for GEODON compared to other antipsychotic drugs or placebo, but the extent of exposure was limited, especially for the drugs used as active controls and placebo. Nevertheless, GEODON's larger prolongation of QTc length compared to several other antipsychotic drugs raises the possibility that the risk of sudden death may be greater for GEODON than for other available drugs for treating schizophrenia. This possibility needs to be considered in deciding among alternative drug products. Certain circumstances may increase the risk of the occurrence of torsade de pointes and/or sudden death in association with the use of drugs that prolong the QTc interval, including (1) bradycardia; (2) hypokalemia or hypomagnesemia; (3) concomitant use of other drugs that prolong the QTc interval; and (4) presence of congenital prolongation of the QT interval. GEODON should also be avoided in patients with congenital long QT syndrome and in patients with a history of cardiac arrhythmias (see **CONTRAINDICATIONS**, and see **Drug Interactions** under **PRECAUTIONS**). It is recommended that patients being considered for GEODON treatment who are at risk for significant electrolyte disturbances, hypokalemia in particular, have baseline serum potassium and magnesium measurements. Hypokalemia (and/or hypomagnesemia) may increase the risk of QT prolongation and arrhythmia. Hypokalemia may result from diuretic therapy, diarrhea, and other causes. Patients with low serum potassium and/or magnesium should be repleted with those electrolytes before proceeding with treatment. It is essential to periodically monitor serum electrolytes in patients for whom diuretic therapy is introduced during GEODON treatment. Persistently prolonged QTc intervals may also increase the risk of further prolongation and arrhythmia, but it is not clear that routine screening ECG measures are effective in detecting such patients. Rather, GEODON should be avoided in patients with histories of significant cardiovascular illness, e.g., QT prolongation, recent acute myocardial infarction, uncompensated heart failure, or cardiac arrhythmia. GEODON should be discontinued in patients who are found to have persistent QTc measurements >500 msec. **Neuroleptic Malignant Syndrome (NMS):** A potentially fatal syndrome complex sometimes referred to as Neuroleptic Malignant Syndrome (NMS) has been reported in association with administration of antipsychotic drugs. The management of NMS should include: (1) immediate discontinuation of antipsychotic drugs and other drugs not essential to concurrent therapy; (2) intensive symptomatic treatment and medical monitoring; and (3) treatment of any concomitant serious medical problems for which specific treatments are available. If a patient requires antipsychotic drug treatment after recovery from NMS, the potential reintroduction of drug therapy should be carefully considered. The patient should be carefully monitored, since recurrences of NMS have been reported. **Tardive Dyskinesia (TD):** A syndrome of potentially irreversible, involuntary, dyskinetic movements may develop in patients undergoing treatment with antipsychotic drugs. Although the prevalence of TD appears to be highest among the elderly, especially elderly women, it is impossible to rely on prevalence estimates to predict, at the inception of antipsychotic treatment, which patients are likely to develop TD. If signs and symptoms of TD appear in a patient on GEODON, drug discontinuation should be considered. **Hyperglycemia and Diabetes Mellitus:** There have been reports of hyperglycemia or diabetes in patients treated with GEODON, and it is not known if GEODON is associated with these events. Patients treated with an atypical antipsychotic should be monitored for symptoms of hyperglycemia. **PRECAUTIONS—General:** Rash: In premarketing trials, about 5% of GEODON patients developed rash and/or urticaria, with discontinuation of treatment in about one-sixth of these cases. The occurrence of rash was dose related, although the finding might also be explained by longer exposure in higher-dose patients. Several patients with rash had signs and symptoms of associated systemic illness, e.g., elevated WBCs. Most patients improved promptly upon treatment with antihistamines or steroids and/or upon discontinuation of GEODON, and all patients were reported to recover completely. Upon appearance of rash for which an alternative etiology cannot be identified, GEODON should be discontinued. **Orthostatic Hypotension:** GEODON may induce orthostatic hypotension associated with dizziness, tachycardia, and, in some patients, syncope, especially during the initial dose-titration period, probably reflecting its  $\alpha_1$ -adrenergic antagonist properties. Syncope was reported in 0.6% of GEODON patients. GEODON should be used with particular caution in patients with known cardiovascular disease (history of myocardial infarction or ischemic heart disease, heart failure or conduction abnormalities), cerebrovascular disease or conditions that would predispose patients to hypotension (dehydration, hypovolemia, and treatment with antihypertensive medications). **Seizures:** In clinical trials, seizures occurred in 0.4% of GEODON patients. There were confounding factors that may have contributed to seizures in many of these cases. As with other antipsychotic drugs, GEODON should be used cautiously in patients with a history of seizures or with conditions that potentially lower the seizure threshold, e.g., Alzheimer's dementia. Conditions that lower the seizure threshold may be more prevalent in a population of 65 years or older. **Dysphagia:** Esophageal dysmotility and aspiration have been associated with antipsychotic drug use. Aspiration pneumonia is a common cause of morbidity and mortality in elderly patients, in particular those with advanced Alzheimer's dementia, and GEODON and other antipsychotic drugs should be used cautiously in patients at risk for aspiration pneumonia. (See also **Boxed Warning**, **WARNINGS: Increased Mortality in Elderly Patients with Dementia-Related Psychosis**). **Hyperprolactinemia:** As with other drugs that antagonize dopamine D<sub>2</sub> receptors, GEODON elevates prolactin levels in humans. Tissue culture experiments indicate that approximately one third of human breast cancers are prolactin dependent *in vitro*, a factor of potential importance if the prescription of these drugs is contemplated in a patient with previously detected breast cancer. Neither clinical studies nor epidemiologic studies conducted to date have shown an association between chronic administration of this class of drugs and tumor genesis in humans; the available evidence is considered too limited to be conclusive at this time. **Potential for Cognitive and Motor Impairment:** Somnolence was a commonly reported adverse event in GEODON patients. In the 4- and 6-week placebo-controlled trials, somnolence was reported in 14% of GEODON patients vs 7% of placebo patients. Somnolence led to discontinuation in 0.3% of patients in short-term clinical trials. Since GEODON has the potential to impair judgment, thinking, or motor skills, patients should be cautioned about performing activities requiring mental alertness, such as operating a motor vehicle (including automobiles) or operating hazardous machinery until they are reasonably certain that GEODON therapy does not affect them adversely. **Prisipism:** One case of prisipism was reported in the premarketing database. **Body Temperature Regulation:** Although not reported with GEODON in premarketing trials, disruption of the body's ability to reduce core body temperature has been attributed to antipsychotic agents. **Suicide:** The possibility of a suicide attempt is inherent in psychotic illness and close supervision of high-risk patients should accompany drug therapy. GEODON prescriptions should be written for the smallest quantity of capsules consistent with good patient management to reduce overdose risk. **Use in Patients with Concomitant Illness:** Clinical experience with GEODON in patients with certain concomitant systemic illnesses is limited. GEODON has not been evaluated or used to any appreciable extent in patients with a recent history of myocardial infarction or unstable heart disease. Patients with these diagnoses were excluded from premarketing clinical studies. Because of the risk of QTc prolongation and orthostatic hypotension with GEODON, caution should be observed in cardiac patients (see **QT Prolongation and Risk of Sudden Death** in **WARNINGS** and **Orthostatic Hypotension** in **PRECAUTIONS**). **Information for Patients:** To ensure safe and effective use of GEODON, the

information and instructions in the **Patient Information** Sections should be discussed with patients. **Laboratory Tests:** Patients being considered for GEODON treatment who are at risk of significant electrolyte disturbances should have baseline serum potassium and magnesium measurements. Low serum potassium and magnesium should be replaced before treatment. Patients who are started on diuretics during GEODON therapy need periodic monitoring of serum potassium and magnesium. Discontinue GEODON in patients who are found to have persistent QTc measurements >500 msec (see **WARNINGS**). **Drug Interactions:** (1) GEODON should not be used with any drug that prolongs the QT interval. (2) Given the primary CNS effects of GEODON, caution should be used when it is taken in combination with other centrally acting drugs. (3) Because of its potential for inducing hypotension, GEODON may enhance the effects of certain antihypertensive agents. (4) GEODON may antagonize the effects of levodopa and dopamine agonists. Effect of Other Drugs on GEODON: **Carbamazepine:** 200 mg bid for 21 days, resulted in a decrease of approximately 35% in the AUC of GEODON. **Ketoconazole:** a potent inhibitor of CYP3A4, 400 mg qd for 5 days, increased the AUC and  $C_{max}$  of GEODON by about 35%. **AUC of GEODON:** 800 mg qd for 2 days, did not affect GEODON pharmacokinetics. Coadministration of 30 mL of **Maisox** did not affect GEODON pharmacokinetics. Population pharmacokinetic analysis of schizophrenic patients in controlled clinical trials has not revealed any clinically significant pharmacokinetic interactions with benztroneprone, propranolol, or lorazepam. Effect of GEODON on Other Drugs: **In vivo** studies revealed little potential for GEODON to interfere with the metabolism of drugs cleared primarily by CYP1A2, CYP2C9, CYP2C19, CYP2D6, and CYP3A4, and little potential for drug interactions with GEODON due to displacement. GEODON 40 mg bid administered concomitantly with **lithium** 450 mg bid for 7 days did not affect the steady-state level or renal clearance of lithium. GEODON 20 mg bid did not affect the pharmacokinetics of concomitantly administered **oral contraceptives**; ethinyl estradiol (0.03 mg) and levonorgestrel (0.15 mg). Consistent with *in vitro* results, a study in normal healthy volunteers showed that GEODON did not alter the metabolism of **deoxynephrine**, a CYP2D6 model substrate, to its major metabolite, **dextropran**. There was no statistically significant change in the urinary dextromethorphan/dextropran ratio. **Carcinogenesis, Mutagenesis, Impairment of Fertility:** Lifetime carcinogenicity studies were conducted with GEODON in Long Evans rats and CD-1 mice. In male mice, there was no increase in incidence of tumors relative to controls. In female mice there were dose-related increases in the incidences of pituitary gland adenoma and carcinoma, and mammary gland adenocarcinoma at all doses tested. Increases in serum prolactin were observed in a 1-month dietary study in female, but not male, mice. GEODON had no effect on serum prolactin in rats in a 5-week dietary study at the doses that were used in the carcinogenicity study. The relevance for human risk of the findings of prolactin-mediated endocrine tumors in rodents is unknown (see **Hyperprolactinemia**). **Mutagenesis:** There was a reproducible mutagenic response in the Ames assay in one strain of *S. typhimurium* in the absence of metabolic activation. Positive results were obtained in both the *in vitro* mammalian cell gene mutation assay and the *in vitro* chromosomal aberration assay in human lymphocytes. **Impairment of Fertility:** GEODON increased time to copulation in Sprague-Dawley rats in two fertility and early embryonic development studies at doses of 10 to 160 mg/kg/day (0.5 to 8 times the MRHD of 200 mg/day on a mg/m<sup>2</sup> basis). Fertility rate was reduced to 160 mg/kg/day (8 times the MRHD on a mg/m<sup>2</sup> basis). There was no effect on fertility at 40 mg/kg/day (2 times the MRHD on a mg/m<sup>2</sup> basis). The fertility of female rats was reduced. **Pregnancy—Pregnancy Category C:** There are no adequate and well-controlled studies in pregnant women. GEODON should be used during pregnancy only if the potential benefit justifies the potential risk to the fetus. **Labor and Delivery:** The effect of GEODON on labor and delivery in humans is unknown. **Nursing Mothers:** It is not known whether, and if so in what amount, GEODON or its metabolites are excreted in human milk. It is recommended that women receiving GEODON should not breast feed. **Pediatric Use:** The safety and effectiveness of GEODON in pediatric patients have not been established. **Geriatric Use:** Of the approximately 4500 patients treated with GEODON in clinical studies, 2,4% (109) were 65 years of age or over. In general, there was no indication of any different tolerability for GEODON or of reduced clearance of GEODON in the elderly compared to younger adults. Nevertheless, the presence of multiple factors that might increase the pharmacodynamic response to GEODON, or cause poorer tolerance or orthostasis, should lead to consideration of a lower starting dose, slower titration, and careful monitoring during the initial dosing period for some elderly patients. **ADVERSE REACTIONS—Adverse Findings Observed in Short-Term, Placebo-Controlled Trials:** The following findings are based on the short-term placebo-controlled premarketing trials for schizophrenia (a pool of two 6-week, and two 4-week fixed-dose trials) and bipolar mania (a pool of two 3-week flexible-dose trials) in which GEODON was administered in doses ranging from 10 to 200 mg/day. **Adverse Events Associated with Discontinuation:** Schizophrenia: Approximately 4.1% (29/702) of GEODON-treated patients in short-term, placebo-controlled studies discontinued treatment due to an adverse event, compared with about 2.2% (6/273) on placebo. The most common event associated with dropout was rash, including 7 dropouts for rash among GEODON patients (1%) compared to no placebo patients (see **PRECAUTIONS**). Bipolar Mania: Approximately 6.5% (18/279) of GEODON-treated patients in short-term, placebo-controlled studies discontinued treatment due to an adverse event, compared with about 3.7% (5/136) on placebo. The most common events associated with dropout in the GEODON-treated patients were akathisia, anxiety, depression, dizziness, dystonia, rash and vomiting, with 2 dropouts for each of these events among GEODON patients (1%) compared to one placebo patient each for dystonia and rash (1%) and no placebo patients for the remaining adverse events. **Adverse Events at an Incidence  $\geq 5\%$  and at Least Twice the Rate of Placebo:** The most commonly observed adverse events associated with GEODON in schizophrenia trials were somnolence (14%) and respiratory tract infection (8%). The most commonly observed adverse events associated with the use of GEODON in bipolar mania trials were somnolence (31%), extrapyramidal symptoms (31%), dizziness (16%), akathisia (10%), abnormal vision (6%), asthenia (6%), and vomiting (5%). The following list enumerates the treatment-emergent adverse events that occurred during acute therapy, including only those events that occurred in 2% of GEODON patients and at a greater incidence than in placebo. Schizophrenia: **Body as a Whole**—asthenia, accidental injury, chest pain. **Cardiovascular**—tachycardia. **Digestive**—nausea, constipation, dyspepsia, diarrhea, dry mouth, anorexia. **Nervous**—extrapyramidal symptoms, somnolence, akathisia, dizziness. **Respiratory**—respiratory tract infection, rhinitis, cough increased. **Skin and Appendages**—rash, fungal dermatitis. **Special Senses**—abnormal vision. Bipolar Mania: **Body as a Whole**—headache, asthenia, accidental injury. **Cardiovascular**—hypertension. **Digestive**—nausea, diarrhea, dry mouth, vomiting, increased salivation, tongue edema, dysphagia. **Musculoskeletal**—myalgia. **Nervous**—somnolence, extrapyramidal symptoms, dizziness, akathisia, anxiety, hyposthesia, speech disorder. **Respiratory**—pharyngitis, dyspnea. **Skin and Appendages**—fungal dermatitis. **Special Senses**—abnormal vision. **Dose Dependence:** An analysis for dose response in the schizophrenia trials revealed an apparent relation of adverse event to dose for the following: asthenia, postural hypotension, anorexia, dry mouth, increased salivation, arthralgia, anxiety, dizziness, dystonia, hypertension, somnolence, tremor, rhinitis, rash, and abnormal vision. **Extrapyramidal Symptoms (EPS):** The incidence of reported EPS for GEODON patients in the short-term, placebo-controlled schizophrenia trials was 14% vs 8% for placebo. Objectively collected data from those trials on the Simpson-Angus Rating Scale and the Barnes Akathisia Scale did not generally show a difference between GEODON and placebo. **Vital Sign Changes:** GEODON is associated with orthostatic hypotension (see **PRECAUTIONS**). **Weight Gain:** In short-term schizophrenia trials, the proportions of patients meeting a weight gain criterion of  $\geq 7\%$  of body weight were compared, revealing a statistically significantly greater incidence of weight gain for GEODON patients (10%) vs placebo patients (4%). A median weight gain of 0.5 kg was observed in GEODON patients vs 0.0 kg in placebo patients. Weight gain was reported as an adverse event in 0.4% of both GEODON and placebo patients. During long-term therapy with GEODON, a categorization of patients at baseline on the basis of body mass index (BMI) showed the greatest mean weight gain and the highest incidence of clinically significant weight gain ( $>7\%$  of body weight) in patients with a low BMI (<23) compared to normal (23-27) or overweight (>27) patients. There was a mean weight gain of 1.4 kg for patients with a "low" baseline BMI, 0.0 kg for patients with a "normal" BMI, and a 1.3 kg mean weight loss for patients with a "high" BMI. **ECG Changes:** GEODON is associated with an increase in the QTc interval (see **WARNINGS**). In schizophrenia trials, GEODON was associated with a mean increase in heart rate of 1.4 beats per minute compared to a 0.2 beats per minute decrease among placebo patients. **Other Adverse Events Observed During the Premarketing Evaluation of GEODON:** Frequent adverse events are those occurring in at least 1/100 patients; infrequent adverse events are those occurring in 1/100 to 1/1000 patients; rare events are those occurring in fewer than 1/1000 patients. Schizophrenia: **Body as a Whole**—Frequent: abdominal pain, flu syndrome, fever, accidental fall, face edema, chills, photosensitivity reaction, flank pain, hyperthermia, motor vehicle accident. **Cardiovascular System**—Frequent: tachycardia, hypertension, postural hypotension. **Infectious:** bradycardia, angina pectoris, atrial fibrillation. **Rare:** first-degree AV block, bundle branch block, plebitis, pulmonary embolism, cardiomegaly, cerebral infarct, cerebrovascular accident, deep thrombophlebitis, myocarditis, thrombophlebitis. **Digestive System**—Frequent: anorexia, vomiting. **Infectious:** rectal hemorrhage, dysphagia, tongue edema. **Rare:** gum hemorrhage, jaundice, fecal impaction, gamma globulin intravitreal injection, rectal hemorrhage, hematemesis, cholestatic jaundice, hepatitis, hepatomegaly, leukoplakia of mouth, fatty liver deposit, melena. **Endocrine**—Rare: hypothyroidism, hyperthyroidism, thyroiditis. **Hemic and Lymphatic System**—Frequent: anemia, ecchymosis, leukocytosis, leukopenia, eosinophilia, lymphadenopathy. **Rare:** thrombocytopenia, hypochromic anemia, lymphocytosis, monocytosis, basophilia, lymphedema, polythemia, thrombocytopenia. **Metabolic and Nutritional Disorders**—Frequent: thirst, transaminase increased, peripheral edema, hyperglycemia, creatine phosphokinase increased, alkaline phosphatase increased, hypercholesterolemia, dehydration, lactic dehydrogenase increased, albuminuria, hypokalemia; **Rare:** BUN increased, creatinine increased, hyperliperlipemia, hypercholesterolemia, hyperkalemia, hypochloremia, hypoglycemia, hyponatremia, hypoprotenemia, glucose tolerance decreased, gout, hyperchloremia, hyperuricemia, hypocalcemia, hypocalcemic reaction, hypomagnesemia, ketosis, respiratory alkalosis. **Musculoskeletal System**—Frequent: myalgia; **Infectious:** tenosynovitis; **Rare:** myopathy. **Nervous System**—Frequent: agitation, extrapyramidal syndrome, tremor, dystonia, randomized trial. **Psychopharmacology** 2001;155:128-134. 2. Lesem MD, Ziecka JM, Swift RR, Reeves RR, Harrison EP. Intramuscular ziprasidone, 2 mg versus 10 mg, in the short-term management of agitated psychotic patients. *J Clin Psychiatry*. 2001;62:12-18. 3. Brook S, Walden J, Benattia I, Siu CO, Romano SJ. Ziprasidone and haloperidol in the treatment of acute exacerbation of schizophrenia and schizoaffective disorder: comparison of intramuscular and oral formulations in a 6-week, randomized, blinded-assessment study. *Psychopharmacology*. 2005;178:514-523. 4. Brook S, Lucey JP, Gunn KP, for the Ziprasidone IM Study Group. Intramuscular ziprasidone compared with intramuscular haloperidol in the treatment of acute psychosis. *J Clin Psychiatry*. 2000;61:933-941. 5. Data on file. Pfizer Inc, New York, NY.

A woman with long dark hair is shown in profile, pulling a dark red curtain away from a window. The scene is dimly lit, with a bright light source coming from the window, creating a strong contrast and highlighting the woman's silhouette and the texture of the curtain. The overall mood is contemplative and somber.

*When symptoms of  
Major Depressive  
Disorder persist  
with treatment*

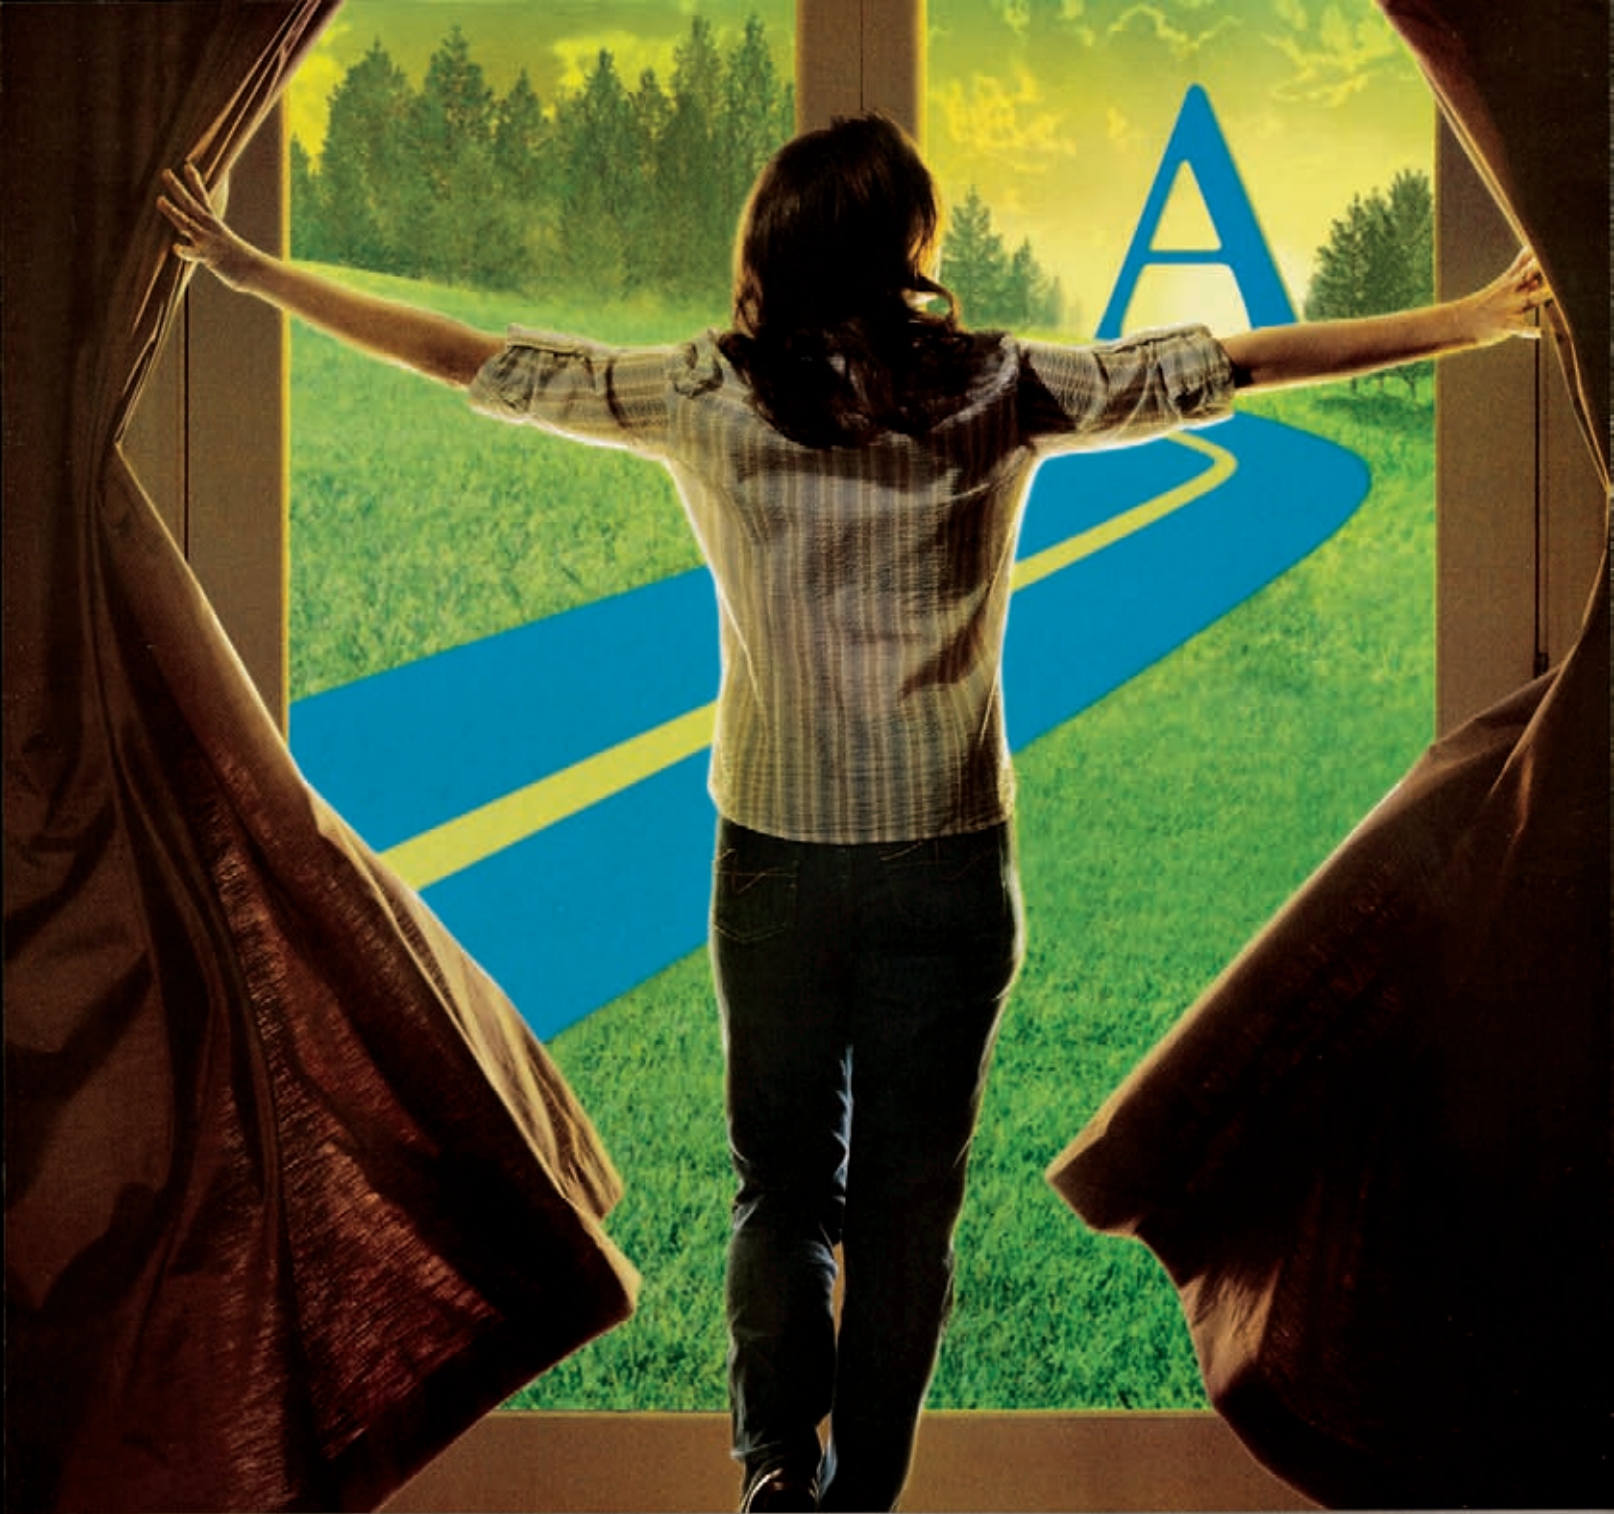

Antidepressants increased the risk compared to placebo of suicidal thinking and behavior (suicidality) in children, adolescents, and young adults in short-term studies of Major Depressive Disorder and other psychiatric disorders. Patients of all ages who are started on antidepressant therapy should be monitored appropriately and observed closely for clinical worsening, suicidality, or unusual changes in behavior, especially during the initial few months of therapy, or at times of dose changes. ABILIFY is not approved for use in pediatric patients with depression (see Boxed WARNING).

Please see IMPORTANT SAFETY INFORMATION, including



# Take the next step to help provide needed relief

The *first and only* adjunctive therapy to antidepressants for adults with Major Depressive Disorder (MDD)<sup>1</sup>

- Significantly improved depressive symptom relief with adjunctive ABILIFY over standard antidepressant therapy alone<sup>2,3</sup>

## SIGNIFICANT CHANGE IN MADRS TOTAL SCORE WITH ABILIFY + ADT (LOCF)<sup>2</sup>

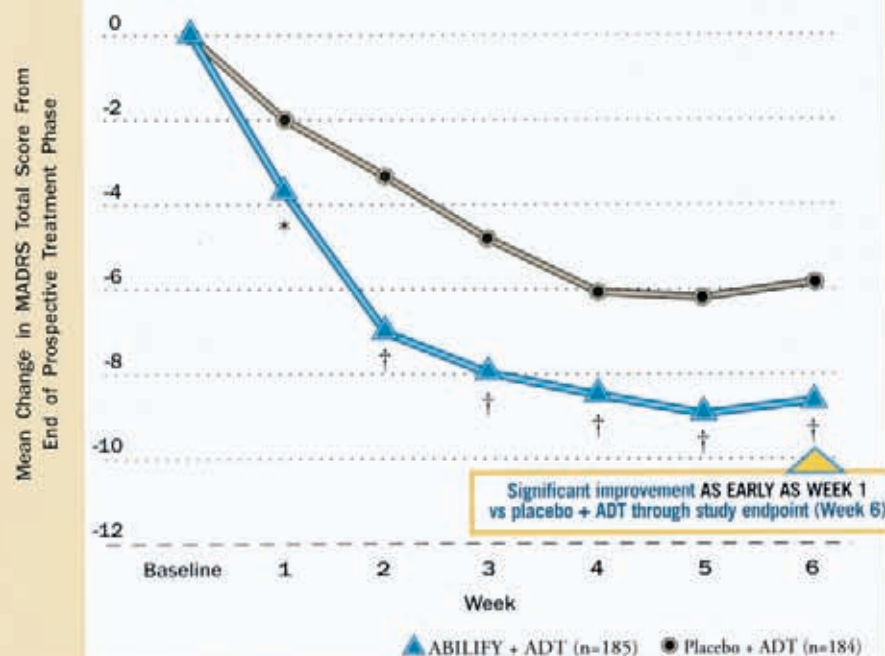

Symptoms measured by MADRS Total Score:

*Apparent Sadness*  
*Reported Sadness*  
*Lassitude*  
*Inability to Feel*  
*Concentration Difficulties*  
*Pessimistic Thoughts*  
*Reduced Appetite*  
*Inner Tension*  
*Reduced Sleep*  
*Suicidal Thoughts*

MADRS=Montgomery-Asberg Depression Rating Scale.

Adapted from Marcus et al. *J Clin Psychopharmacol*. 2008.

\* $P < 0.01$  vs placebo.

† $P < 0.001$  vs placebo. MADRS Total Score is rated from 0-60. ABILIFY dosing: 5 mg/day starting dose, 15 mg/day maximum dose for patients receiving fluoxetine or paroxetine CR, or 20 mg/day for all other patients.

Chart represents one of two registrational trials of adults with nonpsychotic MDD who had an inadequate response to prior antidepressant therapy (1 to 3 courses) in the current episode and an inadequate response to 8 weeks of prospective treatment with a leading antidepressant therapy<sup>2,3</sup>

- In a second registrational trial, significant results were demonstrated as early as Week 2 and continued through study endpoint (Week 6)<sup>3</sup> as measured by mean change in MADRS Total Score
- Few discontinuations due to adverse reactions: ABILIFY + ADT 6% vs placebo + ADT 2%
- In 6-week adjunctive MDD trials, commonly observed adverse reactions of ABILIFY + ADT vs placebo + ADT ( $\geq 5\%$  incidence and at least twice the rate of placebo) included akathisia (25% vs 4%), restlessness (12% vs 2%), fatigue (8% vs 4%), insomnia (8% vs 2%), blurred vision (6% vs 1%), and constipation (5% vs 2%)

**ABILIFY**  
(aripiprazole)  
2 mg, 5 mg Tablet

HELP ILLUMINATE THE PERSON WITHIN

Boxed WARNINGS, and INDICATION on next page.

## IMPORTANT SAFETY INFORMATION and INDICATION for ABILIFY® (aripiprazole)

### INDICATION

- ABILIFY is indicated for use as an adjunctive therapy to antidepressants for the acute treatment of Major Depressive Disorder in adults.

### IMPORTANT SAFETY INFORMATION

#### Increased Mortality in Elderly Patients with Dementia-Related Psychosis

Elderly patients with dementia-related psychosis treated with antipsychotic drugs are at an increased risk (1.6 to 1.7 times) of death compared to placebo (4.5% vs 2.6%, respectively). Although the causes of death were varied, most of the deaths appeared to be cardiovascular (eg, heart failure, sudden death) or infectious (eg, pneumonia) in nature. ABILIFY is not approved for the treatment of patients with dementia-related psychosis.

#### Suicidality and Antidepressant Drugs

Antidepressants increased the risk compared to placebo of suicidal thinking and behavior (suicidality) in children, adolescents, and young adults in short-term studies of Major Depressive Disorder (MDD) and other psychiatric disorders. Anyone considering the use of adjunctive ABILIFY or another antidepressant in a child, adolescent, or young adult must balance this risk with the clinical need. Short-term studies did not show an increased risk of suicidality in adults beyond age 24. Depression and certain other psychiatric disorders are themselves associated with increases in the risk of suicide. Patients of all ages who are started on antidepressant therapy should be monitored appropriately and observed closely for clinical worsening, suicidality, or unusual changes in behavior. Families and caregivers should be advised of the need for close observation and communication with the prescriber. ABILIFY is not approved for use in pediatric patients with depression.

See Full Prescribing Information for complete Boxed WARNINGS

**Contraindication** – Known hypersensitivity reaction to ABILIFY. Reactions have ranged from pruritus/urticaria to anaphylaxis.

- **Cerebrovascular Adverse Events, Including Stroke** – Increased incidence of cerebrovascular adverse events (eg, stroke, transient ischemic attack), including fatalities, have been reported in clinical trials of elderly patients with dementia-related psychosis treated with ABILIFY.
- **Neuroleptic Malignant Syndrome (NMS)** – As with all antipsychotic medications, a rare and potentially fatal condition known as NMS has been reported with ABILIFY. NMS can cause hyperpyrexia, muscle rigidity, diaphoresis, tachycardia, irregular pulse or blood pressure, cardiac dysrhythmia, and altered mental status. If signs and symptoms appear, immediate discontinuation is recommended.
- **Tardive Dyskinesia (TD)** – The risk of developing TD and the potential for it to become irreversible may increase as the duration of treatment and the total cumulative dose increase. Prescribing should be consistent with the need to minimize TD. If signs and symptoms appear, discontinuation should be considered since TD may remit, partially or completely.
- **Hyperglycemia and Diabetes Mellitus** – Hyperglycemia, in some cases associated with ketoacidosis, coma, or death, has been reported in patients treated with atypical antipsychotics including ABILIFY. Patients with diabetes should be monitored for worsening of glucose control; those with risk factors for diabetes should undergo baseline and periodic fasting blood glucose testing. Patients who develop

symptoms of hyperglycemia should also undergo fasting blood glucose testing. There have been few reports of hyperglycemia with ABILIFY.

**Orthostatic Hypotension** – ABILIFY may be associated with orthostatic hypotension and should be used with caution in patients with known cardiovascular disease, cerebrovascular disease, or conditions which would predispose them to hypotension.

**Seizures/Convulsions** – As with other antipsychotic drugs, ABILIFY should be used with caution in patients with a history of seizures or with conditions that lower the seizure threshold.

**Potential for Cognitive and Motor Impairment** – Like other antipsychotics, ABILIFY may have the potential to impair judgment, thinking, or motor skills. Patients should not drive or operate hazardous machinery until they are certain ABILIFY does not affect them adversely.

**Body Temperature Regulation** – Disruption of the body's ability to reduce core body temperature has been attributed to antipsychotics. Appropriate care is advised for patients who may exercise strenuously, be exposed to extreme heat, receive concomitant medication with anticholinergic activity, or be subject to dehydration.

**Suicide** – The possibility of a suicide attempt is inherent in psychotic illnesses, Bipolar Disorder, and Major Depressive Disorder, and close supervision of high-risk patients should accompany drug therapy. Prescriptions should be written for the smallest quantity consistent with good patient management in order to reduce the risk of overdose.

**Dysphagia** – Esophageal dysmotility and aspiration have been associated with antipsychotic drug use, including ABILIFY; use caution in patients at risk for aspiration pneumonia.

Physicians should advise patients to avoid alcohol while taking ABILIFY.

Strong CYP3A4 (eg, ketoconazole) or CYP2D6 (eg, fluoxetine) inhibitors will increase ABILIFY drug concentrations; reduce ABILIFY dose by one-half when used concomitantly, except when used as adjunctive treatment with antidepressants in adults with Major Depressive Disorder.

CYP3A4 inducers (eg, carbamazepine) will decrease ABILIFY drug concentrations; double ABILIFY dose when used concomitantly.

**Commonly observed adverse reactions** (≥5% incidence and at least twice the rate of placebo for adjunctive ABILIFY vs adjunctive placebo, respectively):

- Adult patients (with Major Depressive Disorder): akathisia (25% vs 4%), restlessness (12% vs 2%), insomnia (8% vs 2%), constipation (5% vs 2%), fatigue (8% vs 4%), and blurred vision (6% vs 1%)

Dystonia is a class effect of antipsychotic drugs. Symptoms of dystonia may occur in susceptible individuals during the first days of treatment and at low doses.

**References:** 1. *PDR® Electronic Library*® (n.d.). Greenwood Village, CO: Thomson Micromedex. <http://www.thomsonhc.com>. Accessed October 16, 2007. 2. Berman RM, Marcus RN, Swanink R, et al. The efficacy and safety of aripiprazole as adjunctive therapy in major depressive disorder: a multicenter, randomized, double-blind, placebo-controlled study. *J Clin Psychiatry*. 2007;68:843-853. 3. Marcus RN, McQuade RD, Carson WH, et al. The efficacy and safety of aripiprazole as adjunctive therapy in major depressive disorder: a second multicenter, randomized, double-blind, placebo-controlled study. *J Clin Psychopharmacol*. 2008;28:156-165.

Please see BRIEF SUMMARY OF FULL PRESCRIBING INFORMATION, including Boxed WARNINGS, on adjacent pages.

 Bristol-Myers Squibb

 Otsuka Otsuka America Pharmaceutical, Inc.

©2008 Otsuka America Pharmaceutical, Inc., Rockville, MD

570US08AB23701 August 2008 0108A-1268 Printed in USA  Printed on recycled paper.

  
ABILIFY®  
(aripiprazole)  
2 mg, 5 mg Tablet

HELP ILLUMINATE THE PERSON WITHIN

**ABILIFY® (aripiprazole) Tablets**  
**ABILIFY DISCMLT® (aripiprazole) Orally Disintegrating Tablets**  
**ABILIFY® (aripiprazole) Oral Solution**

Brief Summary of Prescribing Information. For complete prescribing information consult official package insert.

**WARNINGS: INCREASED MORTALITY IN ELDERLY PATIENTS WITH DEMENTIA-RELATED PSYCHOSIS and SUICIDALITY AND ANTI-DEPRESSANT DRUGS**

Elderly patients with dementia-related psychosis treated with atypical antipsychotic drugs are at an increased risk of death compared to placebo. Analyses of seventeen placebo-controlled trials (median duration of 10 weeks) in these patients revealed a risk of death in the drug-treated patients of between 1.6 to 1.7 times that seen in placebo-treated patients. Over the course of a typical 10-week controlled trial, the rate of death in drug-treated patients was about 4.5%, compared to a rate of about 2.8% in the placebo group. Although the causes of death were varied, most of the deaths appeared to be either cardiovascular (eg, heart failure, sudden death) or infectious (eg, pneumonia) in nature. ABILIFY is not approved for the treatment of patients with dementia-related psychosis [see Warnings and Precautions].

Anti-depressants increased the risk compared to placebo of suicidal thinking and behavior (suicidality) in children, adolescents, and young adults in short-term studies of Major Depressive Disorder (MDD) and other psychiatric disorders. Anyone considering the use of adjunctive ABILIFY or any other antidepressant in a child, adolescent, or young adult must balance this risk with the clinical need. Short-term studies did not show an increase in the risk of suicidality with antidepressants compared to placebo in adults beyond age 24; there was a reduction in risk with antidepressants compared to placebo in adults aged 65 and older. Depression and certain other psychiatric disorders are themselves associated with increases in the risk of suicide. Patients of all ages who are started on antidepressant therapy should be monitored appropriately and observed closely for clinical worsening, suicidality, or unusual changes in behavior. Families and caregivers should be advised of the need for close observation and communication with the prescriber. ABILIFY is not approved for use in pediatric patients with depression [see Warnings and Precautions].

**INDICATIONS AND USAGE:** ABILIFY (aripiprazole) is indicated for use as an adjunctive therapy to antidepressants for the acute treatment of Major Depressive Disorder in adults [see Clinical Studies (14.3) in Full Prescribing Information].

**CONTRAINDICATIONS:** Known hypersensitivity reaction to ABILIFY. Reactions have ranged from pruritus/urticaria to anaphylaxis [see Adverse Reactions].

**WARNINGS AND PRECAUTIONS:** Use in Elderly Patients with Dementia-Related Psychosis - Increased Mortality Elderly patients with dementia-related psychosis treated with atypical antipsychotic drugs are at an increased risk of death compared to placebo. ABILIFY is not approved for the treatment of patients with dementia-related psychosis [see Boxed Warning].

**Cardiovascular Adverse Events, Including Stroke:** In placebo-controlled clinical studies (two flexible dose and one fixed dose study) of dementia-related psychosis, there was an increased incidence of cardiovascular adverse events (eg, stroke, transient ischemic attack, including fatalities). In aripiprazole-treated patients (mean age: 84 years; range: 79-98 years). In the fixed-dose study, there was a statistically significant dose response relationship for cardiovascular adverse events in patients treated with aripiprazole. Aripiprazole is not approved for the treatment of patients with dementia-related psychosis [see also Boxed Warning].

**Safety Experience in Elderly Patients with Psychosis Associated with Alzheimer's Disease:** In three, 10-week, placebo-controlled studies of aripiprazole in elderly patients with psychosis associated with Alzheimer's disease (N=936; mean age: 82.4 years; range: 76-99 years), the treatment-emergent adverse events that were reported at an incidence of  $\geq 1\%$  and aripiprazole incidence at least twice that for placebo were urinary incontinence (placebo 2%, aripiprazole 5%), somnolence (including sedation) (placebo 2%, aripiprazole 6%), and incoherence (primarily urinary incontinence) (placebo 1%, aripiprazole 5%), excessive salivation (placebo 0%, aripiprazole 4%), and lethargy/drowsiness (placebo 1%, aripiprazole 4%). The safety and efficacy of ABILIFY in the treatment of patients with psychosis associated with dementia have not been established. If the prescriber elects to treat such patients with ABILIFY, vigilance should be exercised, particularly for the emergence of difficulty swallowing or excessive somnolence, which could predispose to accidental injury or aspiration [see also Boxed Warning].

**Clinical Worsening of Depression and Suicide Risk:** Patients with Major Depressive Disorder (MDD), both adult and pediatric, may experience worsening of their depression and/or the emergence of suicidal ideation and behavior (suicidality) or unusual changes in behavior, whether or not they are taking antidepressant medications, and this risk may persist until significant remission occurs. Suicide is a known risk of depression and certain other psychiatric disorders, and these disorders themselves are the strongest predictors of suicide. There has been a long-standing concern, however, that antidepressants may have a role in inducing worsening of depression and the emergence of suicidality in certain patients during the early phases of treatment. Pooled analyses of short-term placebo-controlled trials of antidepressant drugs (SSRIs and others) showed that these drugs increase the risk of suicidal thinking and behavior (suicidality) in children, adolescents, and young adults ages 18-24 with Major Depressive Disorder (MDD) and other psychiatric disorders. Short-term studies did not show an increase in the risk of suicidality with antidepressants compared to placebo in adults beyond age 24; there was a reduction with antidepressants compared to placebo in adults aged 65 and older. The pooled analyses of placebo-controlled trials in children and adolescents with MDD, Obsessive Compulsive Disorder (OCD), or other psychiatric disorders included a total of 214 short-term trials in 4496 patients. The pooled analyses of placebo-controlled trials in adults with MDD or other psychiatric disorders included a total of 295 short-term trials (median duration of 2 months) of 11 antidepressant drugs in over 77,000 patients. There was considerable variation in risk of suicidality among drugs, but a tendency toward an increase in the younger patients for almost all drugs studied. There were differences in absolute risk of suicidality across the different indications, with the highest incidence in MDD. The risk differences (drug vs. placebo), however, were relatively stable within age strata and across indications. These risk differences (drug vs. placebo) differed in the number of cases of suicidality per 1000 patients treated: were reported as **increases** compared to placebo:  $<18$  (14 additional cases); 18-24 (5 additional cases); and **Decreases** compared to placebo: 25-64 (1 fewer case);  $\geq 65$  (6 fewer cases). No suicides occurred in any of the pediatric trials. They were suicides in the adult trials, but the number was not sufficient to reach any conclusion about drug effect on suicide.

It is unknown whether the suicidality risk extends to longer-term use, ie, beyond several months. However, there is substantial evidence from placebo-controlled maintenance trials in adults with depression that the use of antidepressants can delay the recurrence of depression.

All patients being treated with antidepressants for any indication should be monitored appropriately and observed closely for clinical worsening, suicidality, and unusual changes in behavior, especially during the initial few months of a course of drug therapy, or at times of dose changes, either increases or decreases. The following symptoms, anxiety, agitation, panic attacks, insomnia, irritability, hostility, aggressiveness, impulsivity, akathisia (psychomotor restlessness), hyperkinesia, and mania, have been reported in adult and pediatric patients being treated with antidepressants for Major Depressive Disorder as well as for other indications, both psychiatric and nonpsychiatric. Although a causal link between the emergence of these symptoms and either the worsening of depression and/or the emergence of suicidal impulses has not been established, there is concern that such symptoms may represent precursors to emerging suicidality.

Consideration should be given to changing the therapeutic regimen, including possibly discontinuing the medication, in patients whose depression is persistently worse, or who are experiencing emergent suicidality or symptoms that might be precursors to worsening depression or suicidality, especially if these symptoms are severe, abrupt in onset, or were not part of the patient's presenting symptoms.

**Families and caregivers of patients being treated with antidepressants for Major Depressive Disorder or other indications, both psychiatric and nonpsychiatric, should be alerted about the need to monitor patients for the emergence of agitation, irritability, unusual changes in behavior, and the other symptoms described above, as well as the emergence of suicidality, and to report such symptoms immediately to healthcare providers. Such monitoring should include daily observation by families and caregivers.** Prescriptions for ABILIFY should be written for the smallest quantity of tablets consistent with good patient management. In order to reduce the risk of overdose.

**Screening Patients for Bipolar Disorder:** A major depressive episode may be the initial presentation of Bipolar Disorder. It is generally believed (though not established in controlled trials) that treating such an episode with an antidepressant alone may increase the likelihood of precipitation of a mania/mixed episode in patients at risk for Bipolar Disorder. Whether any of the symptoms described above represent such a conversion is unknown. However, prior to initiating treatment with an antidepressant, patients with depressive symptoms should be adequately screened to determine if they are at risk for Bipolar Disorder; such screening should include a detailed psychiatric history, including a family history of suicide, Bipolar Disorder, and depression.

It should be noted that ABILIFY is not approved for use in treating depression in the pediatric population.

**Neuroleptic Malignant Syndrome (NMS):** A potentially fatal symptom complex sometimes referred to as Neuroleptic Malignant Syndrome (NMS) may occur with administration of antipsychotic drugs, including aripiprazole. Rare cases of NMS occurred during aripiprazole treatment in the worldwide clinical database. Clinical manifestations of NMS are hyperreflexia, muscle rigidity, altered mental status, and evidence of autonomic instability (irregular pulse or blood pressure, tachycardia, diaphoresis, and cardiac dysrhythmias). Additional signs may include elevated creatine phosphokinase, myoglobinuria (rhabdomyolysis), and acute renal failure.

The diagnostic evaluation of patients with this syndrome is complicated. In arriving at a diagnosis, it is important to exclude causes where the clinical presentation includes both serious medical illness (eg, pneumonia, systemic infection) and untreated or inadequately treated extrapyramidal signs and symptoms (EPS). Other important considerations in the differential diagnosis include central anticholinergic toxicity, heat stroke, drug fever, and primary central nervous system pathology.

The management of NMS should include: 1) immediate discontinuation of antipsychotic drugs and other drugs not essential to concurrent therapy; 2) intensive symptomatic treatment and medical monitoring; and 3) treatment of any concurrent serious medical problems with specific treatments as available. There is no general agreement about specific pharmacological treatment regimens for uncomplicated NMS. If a patient requires antipsychotic drug treatment after recovery from NMS, the potential reprecipitation of drug toxicity should be carefully considered. The patient should be carefully monitored, since recurrences of NMS have been reported.

**Tardive Dyskinesia:** A syndrome of potentially irreversible, involuntary, dyskinetic movements may develop in patients treated with antipsychotic drugs. Although the prevalence of the syndrome appears to be highest among the elderly, especially elderly women, it is impossible to rely upon prevalence estimates to predict, at the inception of antipsychotic treatment, which patients are likely to develop the syndrome. Whether antipsychotic drug products differ in their potential to cause tardive dyskinesia is unknown.

The risk of developing tardive dyskinesia and the likelihood that it will become irreversible are believed to increase as the duration of treatment

and the total cumulative dose of antipsychotic drugs administered to the patient increase. However, the syndrome can develop, although much less commonly, after relatively brief treatment periods at low doses. There is no known treatment for established cases of tardive dyskinesia, although the syndrome may remit, partially or completely. If antipsychotic treatment is withdrawn, antipsychotic treatment, itself, however, may suppress (or partially suppress) the signs and symptoms of the syndrome and, thereby, may possibly mask the underlying process. The effect that symptomatic suppression has upon the long-term course of the syndrome is unknown.

Given these considerations, ABILIFY (aripiprazole) should be prescribed in a manner that is most likely to minimize the occurrence of tardive dyskinesia. Chronic antipsychotic treatment should generally be reserved for patients who suffer from a chronic illness that (1) is known to respond to antipsychotic drugs and (2) for whom alternative, equally effective, but potentially less harmful treatments are not available or appropriate. In patients who do require chronic treatment, the smallest dose and the shortest duration of treatment producing a satisfactory clinical response should be sought. The need for continued treatment should be reassessed periodically. If signs and symptoms of tardive dyskinesia appear in a patient on ABILIFY, drug discontinuation should be considered. However, some patients may require treatment with ABILIFY despite the presence of the syndrome.

**Hyperglycemia and Diabetes Mellitus:** Hyperglycemia, in some cases severe and associated with ketoacidosis or hyperosmolar coma or death, has been reported in patients treated with atypical antipsychotics. There have been low reports of hyperglycemia in patients treated with ABILIFY [see Adverse Reactions]. Although fewer patients have been treated with ABILIFY, it is not known if this more limited experience is the sole reason for the paucity of such reports. Assessment of the relationship between atypical antipsychotic use and glucose abnormalities is complicated by the possibility of an increased background risk of diabetes mellitus in patients with Schizophrenia and the increasing incidence of diabetes mellitus in the general population. Given these confounders, the relationship between atypical antipsychotic use and hyperglycemia-related adverse events is not completely understood. However, epidemiologic studies which did not include ABILIFY suggest an increased risk of treatment-emergent hyperglycemia-related adverse events in patients treated with the atypical antipsychotics included in these studies. Because ABILIFY was not included in the time these studies were performed, it is not known if ABILIFY is associated with this increased risk. Precise risk estimates for hyperglycemia-related adverse events in patients treated with atypical antipsychotics are not available.

Patients with an established diagnosis of diabetes mellitus who are started on atypical antipsychotics should be monitored regularly for worsening of glucose control. Patients with risk factors for diabetes mellitus (eg, obesity, family history of diabetes) who are starting treatment with atypical antipsychotics should undergo fasting blood glucose testing at the beginning of treatment and periodically during treatment. Any patient treated with atypical antipsychotics should be monitored for symptoms of hyperglycemia including polydipsia, polyuria, polyphagia, and weakness. Patients who develop symptoms of hyperglycemia during treatment with atypical antipsychotics should undergo fasting blood glucose testing. In some cases, hyperglycemia has resolved when the atypical antipsychotic was discontinued; however, some patients required continuation of anti-diabetic treatment despite discontinuation of the suspect drug.

**Orthostatic Hypotension:** Aripiprazole may cause orthostatic hypotension, perhaps due to its  $\alpha_1$ -adrenergic receptor antagonism. The incidence of orthostatic hypotension-associated events from short-term, placebo-controlled trials of adult patients on oral ABILIFY (N=2447) included: orthostatic hypotension, dizziness, lightheadedness, orthostatic hypotension (1%, 0.3%), pruritus, asthenia (0.5%, 0.3%), and syncope (0.5%, 0.4%). The incidence of a significant orthostatic change in blood pressure (defined as a decrease in systolic blood pressure  $\geq 20$  mmHg accompanied by an increase in heart rate  $\geq 25$  when comparing standing to supine values) for aripiprazole was not meaningfully different from placebo (aripiprazole incidence, placebo incidence; in adult oral aripiprazole-treated patients (4%, 2%). Aripiprazole should be used with caution in patients with known cardiovascular disease (history of myocardial infarction or ischemic heart disease, heart failure or conduction abnormalities), cerebrovascular disease, or conditions which would predispose patients to hypotension (dehydration, hypovolemia, and treatment with antihypertensive medications).

**Seizures/Convulsions:** In short-term, placebo-controlled trials, seizures/convulsions occurred in 0.1% (3/2447) of adult patients treated with oral aripiprazole. As with other antipsychotic drugs, aripiprazole should be used cautiously in patients with a history of seizures or with conditions that lower the seizure threshold, eg, Acute Myeloid Leukemia. Conditions that lower the seizure threshold may be more prevalent in a population of 65 years or older.

**Potential for Cognitive and Motor Impairment:** ABILIFY, like other antipsychotics, may have the potential to impair judgment, thinking, or motor skills. For example, in short-term, placebo-controlled trials, somnolence (including sedation) was reported as follows: aripiprazole incidence, placebo incidence; in adult patients (N=2447) treated with oral ABILIFY (11%, 6%). Somnolence (including sedation) led to discontinuation in 0.3% (8/2447) of adult patients on oral ABILIFY in short-term, placebo-controlled trials. Despite the relatively modest increase in incidence of these events compared to placebo, patients should be cautioned about operating hazardous machinery, including automobiles, until they are reasonably certain that therapy with ABILIFY does not affect their alertness.

**Body Temperature Regulation:** Disruption of the body's ability to reduce core body temperature has been attributed to antipsychotic agents. Appropriate care is advised when prescribing aripiprazole for patients who will be experiencing conditions which may contribute to an elevation in core body temperature, eg, exertion strenuously, exposure to extreme heat, receiving concomitant medication with anticholinergic activity, or being subject to dehydration [see Adverse Reactions].

**Suicide:** The possibility of a suicide attempt is inherent in psychotic illness. Bipolar Disorder and Major Depressive Disorder and close supervision of high-risk patients should accompany drug therapy. Prescriptions for ABILIFY should be written for the smallest quantity consistent with good patient management in order to reduce the risk of overdose [see Adverse Reactions].

In two 6-week, placebo-controlled studies of aripiprazole as adjunctive treatment of Major Depressive Disorder, the incidences of suicidal ideation and suicide attempts were 0% (0/371) for aripiprazole and 0.3% (2/666) for placebo.

**Dysphagia:** Esophageal dysmotility and aspiration have been associated with antipsychotic drug use. Including ABILIFY. Aspiration pneumonia is a common cause of morbidity and mortality in elderly patients. In particular those with advanced Alzheimer's dementia. Aripiprazole and other antipsychotic drugs should be used cautiously in patients at risk for aspiration pneumonia [see Warnings and Precautions and Adverse Reactions].

**Use in Patients with Concomitant Illness:** Clinical experience with ABILIFY in patients with certain concomitant systemic illnesses is limited [see Use in Specific Populations]. ABILIFY has not been evaluated or used in any appreciable extent in patients with a recent history of myocardial infarction or unstable heart disease. Patients with these diagnoses were excluded from premarketing clinical studies [see Warnings and Precautions].

**ADVERSE REACTIONS: Overall Adverse Reactions Profile:** The following are discussed in more detail in other sections of the labeling [see Warnings and Precautions and Use in Specific Populations]. Use in Elderly Patients with Dementia-Related Psychosis, Clinical Worsening of Depression and Suicide Risk, Neuroleptic Malignant Syndrome, Tardive Dyskinesia, Hyperglycemia and Diabetes Mellitus, Orthostatic Hypotension, Seizures/Convulsions, Potential for Cognitive and Motor Impairment, Body Temperature Regulation, Suicide, Dysphagia. Use in Patients with Concomitant Illness.

The most common adverse reactions in adult patients in clinical trials ( $\geq 10\%$ ) were nausea, vomiting, constipation, headache, dizziness, akathisia, anxiety, insomnia, and restlessness.

Aripiprazole has been evaluated for safety in 13,543 adult patients who participated in multiple-dose, clinical trials in Schizophrenia, Bipolar Disorder, Major Depressive Disorder, Dementia of the Alzheimer's Type, Parkinson's disease, and alcoholism, and who had approximately 7915 patient-years of exposure to oral aripiprazole. A total of 3393 patients were treated with oral aripiprazole for at least 180 days and 1933 patients treated with oral aripiprazole had at least 1 year of exposure. Because clinical trials are conducted under widely varying conditions, adverse reaction rates observed in the clinical trials of a drug cannot be directly compared to rates in the clinical trials of another drug and may not reflect the rates observed in practice.

**Clinical Studies Experience - Adult Patients Receiving ABILIFY as Adjunctive Treatment of Major Depressive Disorder:** The following findings are based on a pool of two placebo-controlled trials of patients with Major Depressive Disorder in which aripiprazole was administered at doses of 2 mg to 20 mg as adjunctive treatment to continued antidepressant therapy.

**Adverse Reactions Associated with Discontinuation of Treatment:** The incidence of discontinuation due to adverse reactions was 6% for adjunctive aripiprazole-treated patients and 0% for adjunctive placebo-treated patients.

**Commonly Observed Adverse Reactions:** The commonly observed adverse reactions associated with the use of adjunctive aripiprazole in patients with Major Depressive Disorder (incidence of 5% or greater and aripiprazole incidence at least twice that for placebo) were: akathisia, restlessness, insomnia, constipation, fatigue, and blurred vision.

**Less Common Adverse Reactions:** The following treatment-emergent reactions occurred at an incidence of  $\geq 2\%$ , rounded to the nearest percent, with adjunctive aripiprazole (doses  $\geq 2$  mg/day), and at a greater incidence with adjunctive aripiprazole than with adjunctive placebo during short-term (up to 8 weeks), placebo-controlled trials (aripiprazole + ADT (n=371); placebo + ADT (n=366); respectively were: Akathisia (25%, 4%), restlessness (12%, 2%), fatigue (9%, 4%), insomnia (8%, 2%), somnolence (8%, 4%), upper respiratory tract infection (8%, 2%), blurred vision (8%, 1%), tremor (8%, 4%), constipation (5%, 2%), arthralgia (4%, 2%), dizziness (4%, 2%), vertigo (4%, 2%), increased appetite (3%, 2%), weight increased (3%, 2%), disturbance in attention (3%, 1%), feeling jittery (2%, 1%), myalgia (2%, 1%), and impotence/male disorder (2%, 0%) ADT = Antidepressant Therapy.

**Dose-Related Adverse Reactions:**

**Extrapyramidal Symptoms:** In the short-term, placebo-controlled trials in Major Depressive Disorder, the incidence of reported EPS-related events, including events leading to discontinuation, for adjunctive aripiprazole-treated patients was 6% vs. 2% for adjunctive placebo-treated patients; and the incidence of EPS-related events for adjunctive aripiprazole-treated patients was 22% vs. 4% for adjunctive placebo-treated patients. Objectively collected data from these trials was collected on the Simpson Angus Rating Scale for EPS, the Barnes Akathisia Scale for akathisia, and the Assessments of Involuntary Movement Scales for dyskinesias; in the Major Depressive Disorder trial, the Simpson Angus Rating Scale and the Barnes Akathisia Scale showed a significant difference between adjunctive aripiprazole and adjunctive placebo (aripiprazole, 0.31; placebo, 0.03 and aripiprazole, 0.22; placebo, 0.02). Changes in the Assessments of Involuntary Movement Scales were similar for the adjunctive aripiprazole and adjunctive placebo groups.

**Dyskinesia:** Case Effect: Symptoms of dyskinesia, prolonged abnormal contractions of muscle groups, may occur in susceptible individuals during the first few days of treatment. Dyskinetic symptoms include spasms of the neck muscles, sometimes progressing to tightness of the throat, making difficult, difficult swallowing, and/or protrusion of the tongue. While these symptoms can occur at low doses, they occur more frequently and with greater severity with high potency and of higher doses of first generation antipsychotic drugs. An elevated risk of acute dyskinesia is observed in males and younger age groups.

**Laboratory Test Abnormalities:** In the 6-week trial of aripiprazole as adjunctive therapy for Major Depressive Disorder, there were no clinically important differences between the adjunctive aripiprazole-treated and adjunctive placebo-treated patients in the median change from baseline in prolactin, fasting glucose, HDL, LDL, or total cholesterol measurements. The median % change from baseline in triglycerides was 5% for adjunctive aripiprazole-treated patients vs. 0% for adjunctive placebo-treated patients.

**Weight Gain:** In the trials adding aripiprazole to antidepressants, patients first received 8 weeks of antidepressant treatment followed by 8 weeks of adjunctive aripiprazole or placebo in addition to their ongoing antidepressant treatment. The mean weight gain with adjunctive aripiprazole was 1.7 kg vs. 0.4 kg with adjunctive placebo. The proportion of patients meeting a weight gain criterion of a 7% of body weight was 5% with adjunctive aripiprazole compared to 1% with adjunctive placebo.

**ECG Changes:** Between group comparisons for a pooled analysis of placebo-controlled trials in patients with Major Depressive Disorder revealed no significant differences between oral aripiprazole and placebo in the proportion of patients experiencing potentially important changes in ECG parameters. Aripiprazole was associated with a median increase in heart rate of 7 beats per minute compared to no increase among placebo patients.

**Other Adverse Reactions Observed During the Pre-marketing Evaluation of Aripiprazole:** Following is a list of MedDRA terms that reflect adverse reactions as defined in Adverse Reactions reported by patients treated with oral aripiprazole of multiple doses  $\geq 2$  mg/day during any phase of a trial within the database of 13,543 adult patients, oral aripiprazole excluding those events already listed to adverse reactions in other parts of Full Prescribing Information, or those considered in Warnings and Precautions. Although the reactions reported occurred during treatment with aripiprazole, they were not necessarily caused by it.

**Adults:** **Oral Administration - Blood and Lymphatic System Disorders:**  $\geq 1/1000$  patients and  $<1/100$  patients - leukopenia, neutropenia, thrombocytopenia; **Cardiac Disorders:**  $\geq 1/1000$  patients and  $<1/100$  patients - bradycardia, palpitations, cardiopulmonary failure, myocardial infarction, cardio-respiratory arrest, sternalgia, chest pain, sinus tachycardia, atrial fibrillation, angina pectoris, myocardial ischemia;  $<1/1000$  patients - atrial flutter, supraventricular tachycardia, ventricular tachycardia; **Eye Disorders:**  $\geq 1/1000$  patients and  $<1/100$  patients - photophobia, diplopia, eyelid edema, photophobia; **Gastrointestinal Disorders:**  $\geq 1/1000$  patients and  $<1/100$  patients - gastroesophageal reflux disease, swollen tongue, esophagitis;  $<1/1000$  patients - pancreatitis; **General Disorders and Administration Site Conditions:**  $\geq 1/1000$  patients - edema, peripheral edema, irritability, chest pain;  $\geq 1/1000$  patients and  $<1/100$  patients - face edema, throat, angioedema;  $<1/1000$  patients - hypothermia; **Hepatic/Biliary Disorders:**  $\geq 1/1000$  patients - hepatitis, jaundice; **Immune System Disorders:**  $\geq 1/1000$  patients and  $<1/100$  patients - hypersensitivity, injury, poisoning, and procedural complications;  $\geq 1/1000$  patients - fall;  $\geq 1/1000$  patients and  $<1/100$  patients - self-harm;  $<1/1000$  patients - heat stroke; **Investigations:**  $\geq 1/1000$  patients - weight decreased, creatine phosphokinase increased;  $\geq 1/1000$  patients and  $<1/100$  patients - negative enzyme increased, blood glucose increased, blood protein increased, blood urea nitrogen increased, electrocardiogram QT prolonged, blood uric acid increased, blood bilirubin increased;  $<1/1000$  patients - blood lactate dehydrogenase increased, gamma-glutamyl transferase increased, albumin and albumin to globulin ratio decreased; **Metabolism and Nutrition Disorders:**  $\geq 1/1000$  patients and  $<1/100$  patients - decreased appetite;  $\geq 1/1000$  patients and  $<1/100$  patients - hyperlipidemia, anorexia, diabetes mellitus (including blood insulin increased, carbohydrate tolerance decreased, diabetes mellitus non-insulin-dependent, glucose tolerance impaired, glycosuria, glucose urine, glucose urine present), hypoglycemia, hypokalemia, hyponatremia, hypoglycemia, polydipsia;  $<1/1000$  patients - diabetic ketoacidosis; **Musculoskeletal and Connective Tissue Disorders:**  $\geq 1/1000$  patients and  $<1/100$  patients - muscle rigidity, muscular weakness, muscle tremor, muscle twinges, myalgia, myopathy;  $\geq 1/1000$  patients and  $<1/100$  patients - hyperreflexia;  $<1/1000$  patients - Grand Mal convulsion, convulsions; **Psychiatric Disorders:**  $\geq 1/1000$  patients - suicidal ideation;  $\geq 1/1000$  patients and  $<1/100$  patients - aggression, loss of libido, suicide attempt, hostility, libido increased, anxiety, anorgasmia, delirium, intentional self-harm, compulsive, tic, homicidal ideation;  $<1/1000$  patients - cataplexy, sleep walking; **Renal and Urinary Disorders:**  $\geq 1/1000$  patients and  $<1/100$  patients - urinary retention, polyuria, nocturia; **Reproductive System and Breast Disorders:**  $\geq 1/1000$  patients and  $<1/100$  patients - menstruation irregular, erectile dysfunction, amenorrhea, breast pain;  $<1/1000$  patients - gynecomealy, priapism; **Respiratory, Thoracic, and Mediastinal Disorders:**  $\geq 1/1000$  patients - nasal congestion, dyspnea, pneumonia aspiration; **Skin and Subcutaneous Tissue Disorders:**  $\geq 1/1000$  patients - rash (including erythematous, exfoliative, generalized, macular, maculopapular, papular/rash, acneiform, allergic contact, exfoliative, seborrheic dermatitis, neurodermatitis, and drug eruptions, hypopycnosis);  $\geq 1/1000$  patients and  $<1/100$  patients - pruritus, photosensitivity reaction, alopecia, alopecia areata; **Vascular Disorders:**  $\geq 1/1000$  patients - hypertension;  $\geq 1/1000$  patients and  $<1/100$  patients - hypotension.

**Postmarketing Experience:** The following adverse reactions have been identified during post-approval use of ABILIFY (aripiprazole). Because these reactions are reported voluntarily from a population of uncertain size, it is not always possible to establish a causal relationship to drug exposure; rare occurrences of allergic reaction (anaphylactic reaction, angioedema, laryngospasm, purpura/urticaria, or oropharyngeal spasm), and blood glucose fluctuation.

**DRUG INTERACTIONS:** Given the primary CNS effects of aripiprazole, caution should be used when ABILIFY is taken in combination with other centrally-acting drugs or alcohol. Due to its alpha adrenergic antagonism, aripiprazole has the potential to enhance the effect of certain antihypertensive agents.

**Potential for Other Drugs to Affect ABILIFY:** Aripiprazole is not a substrate of CYP1A1, CYP1A2, CYP2D6, CYP2C8, CYP2C9, CYP2C19, CYP2D6, or CYP2E1 enzymes. Aripiprazole also does not undergo direct glucuronidation. This suggests that an interaction of aripiprazole with inhibitors or inducers of these enzymes, or other factors, like smoking, is unlikely.

Both CYP3A4 and CYP2D6 are responsible for aripiprazole metabolism. Agents that induce CYP3A4 (eg, carbamazepine) could cause an increase in aripiprazole clearance and lower blood levels. Inhibitors of CYP3A4 (eg, ketoconazole) or CYP2D6 (eg, quinidine, fluoxetine, or paroxetine) can inhibit aripiprazole elimination and cause increased blood levels.

**Ketoconazole and Other CYP3A4 Inhibitors:** Coadministration of ketoconazole (200 mg/day for 14 days) with a 15 mg single dose of aripiprazole increased the AUC of aripiprazole and its active metabolite by 63% and 77%, respectively. The effect of a higher ketoconazole dose (400 mg/day) has not been studied. When ketoconazole is given concomitantly with aripiprazole, the aripiprazole dose should be reduced to one-half of its normal dose. Other strong inhibitors of CYP3A4 (miconazole) would be expected to have similar effects and should lead to similar dose reductions. Other strong inhibitors of CYP3A4 (itraconazole) would be expected to have similar effects and should lead to similar dose reductions. When the CYP2D6 inhibitor is withdrawn from the combination therapy, the aripiprazole dose should be increased. When adjunctive ABILIFY is administered to patients with Major Depressive Disorder, ABILIFY should be administered without dosage adjustment as specified in Dosage and Administration (2.3) in Full Prescribing Information.

**Carbamazepine and Other CYP3A4 Inducers:** Coadministration of carbamazepine (200 mg twice daily), a potent CYP3A4 inducer, with aripiprazole (30 mg/day) resulted in an approximate 70% decrease in  $C_{max}$  and AUC values of both aripiprazole and its active metabolite, dehydro-aripiprazole. When carbamazepine is added to aripiprazole therapy, aripiprazole dose should be doubled. Additional dose increases should be based on clinical evaluation. When carbamazepine is withdrawn from the combination therapy, the aripiprazole dose should be increased.

**Potential for ABILIFY to Affect Other Drugs:** Aripiprazole is unlikely to cause clinically important pharmacokinetic interactions with drugs metabolized by cytochrome P450 enzymes. In *in vitro* studies, 10 mg/day to 30 mg/day doses of aripiprazole had no significant effect on metabolism by CYP2D6 (dextromethorphan, CYP2D9 warfarin), CYP2C19 (omeprazole, warfarin), and CYP3A4 (diazepam, dextromethorphan). Additionally, aripiprazole and dehydro-aripiprazole did not show potential for altering CYP1A2-mediated metabolism *in vitro*. No substrate of aripiprazole was seen on the pharmacokinetics of lithium or valproate.

**Alcohol:** There was no significant difference between aripiprazole coadministered with ethanol and placebo coadministered with ethanol on performance of gross motor skills or stimulus response in healthy subjects. As with most psychoactive medications, patients should be advised to avoid alcohol while taking ABILIFY.

**Drugs Having No Clinically Important Interactions with ABILIFY - Famotidine:** Coadministration of aripiprazole (given in a single dose of 15 mg) with a 40 mg single dose of the H<sub>2</sub> antagonist famotidine, a potent gastric acid blocker, decreased the solubility of aripiprazole and, hence, its rate of absorption, reducing by 37% and 21% the  $C_{max}$  of aripiprazole and dehydro-aripiprazole, respectively, and by 13% and 15%, respectively, the extent of absorption (AUC). No dosage adjustment of aripiprazole is required when administered concomitantly with famotidine.

**Valproate:** When valproate 600 mg/day (1500 mg/day) and aripiprazole (30 mg/day) were coadministered, at steady-state the  $C_{max}$  and AUC of aripiprazole were decreased by 25%. No dosage adjustment of aripiprazole is required when administered concomitantly with valproate. When aripiprazole (30 mg/day) and valproate (1000 mg/day) were coadministered, at steady-state there were no clinically significant changes in the  $C_{max}$  or AUC of valproate. No dosage adjustment of valproate is required when administered concomitantly with aripiprazole.

**Lithium:** A pharmacokinetic interaction of aripiprazole with lithium is unlikely because lithium is not bound to plasma proteins, is not metabolized, and is almost entirely excreted unchanged in urine. Coadministration of therapeutic doses of lithium (1200 mg/day-1800 mg/day) for 21 days with aripiprazole (30 mg/day) did not result in clinically significant changes in the pharmacokinetics of aripiprazole or its active metabolite, dehydro-aripiprazole ( $C_{max}$  and AUC increased by less than 20%). No dosage adjustment of aripiprazole is required when administered concomitantly with lithium. Coadministration of aripiprazole (30 mg/day) with lithium (900 mg/day) did not result in clinically significant changes in the pharmacokinetics of lithium. No dosage adjustment of lithium is required when administered concomitantly with aripiprazole.

**Lamotrigine:** Coadministration of 10 mg/day to 20 mg/day oral doses of aripiprazole for 14 days to patients with Bipolar I Disorder had no effect on the steady-state pharmacokinetics of 100 mg/day to 400 mg/day lamotrigine, a UDP-glucosyltransferase 1A4 substrate. No dosage adjustment of lamotrigine is required when aripiprazole is added to lamotrigine.

**Dextromethorphan:** Aripiprazole at doses of 10 mg/day to 30 mg/day for 14 days had no effect on dextromethorphan's O-demethylation to its major metabolite, dextrophan, a pathway dependent on CYP2D6 activity. Aripiprazole also had no effect on dextromethorphan's N-demethylation to its metabolite 3-methoxydextrophan, a pathway dependent on CYP3A4 activity. No dosage adjustment of dextromethorphan is required when administered concomitantly with aripiprazole.

**Warfarin:** Aripiprazole 10 mg/day for 14 days had no effect on the pharmacokinetics of R-warfarin and S-warfarin or on the pharmacokinetic and point of interconversion Normalized Ratio, indicating the lack of a clinically relevant effect of aripiprazole on CYP2C2 and CYP2C9 metabolism or the binding of highly protein-bound warfarin. No dosage adjustment of warfarin is required when administered concomitantly with aripiprazole.

**Omeprazole:** Aripiprazole 10 mg/day for 15 days had no effect on the pharmacokinetics of a single 20 mg dose of omeprazole, a CYP2C19 substrate, in healthy subjects. No dosage adjustment of aripiprazole is required when administered concomitantly with aripiprazole.

**Lorazepam:** Coadministration of lorazepam injection (2 mg) and aripiprazole injection (15 mg) to healthy subjects (n=40; 35 males and 5 females; ages 19-45 years old) did not result in clinically important changes in the pharmacokinetics of either drug. No dosage adjustment of aripiprazole is required when administered concomitantly with lorazepam. However, the intensity of sedation was greater with the combination as compared to that observed with aripiprazole alone and the antistatic hypotension observed was greater with the combination as compared to that observed with lorazepam alone (see Warnings and Precautions).

**Escitalopram:** Coadministration of 10 mg/day oral doses of aripiprazole for 14 days to healthy subjects had no effect on the steady-state pharmacokinetics of 10 mg/day escitalopram, a substrate of CYP2C19 and CYP3A4. No dosage adjustment of escitalopram is required when aripiprazole is added to escitalopram.

**Venlafaxine:** Coadministration of 10 mg/day to 20 mg/day oral doses of aripiprazole for 14 days to healthy subjects had no effect on the steady-state pharmacokinetics of venlafaxine and O-desmethylvenlafaxine following 75 mg/day venlafaxine XR, a CYP2D6 substrate. No dosage adjustment of venlafaxine is required when aripiprazole is added to venlafaxine.

**Fluoxetine, Paroxetine, and Sertraline:** A population pharmacokinetic analysis in patients with Major Depressive Disorder showed no substantial change in plasma concentrations of fluoxetine (20 mg/day or 40 mg/day), paroxetine CR (20 mg/day or 30 mg/day), or sertraline (100 mg/day or 150 mg/day) (based on steady-state). The steady-state plasma concentrations of fluoxetine and paroxetine increased by about 19% and 36%, respectively, and concentrations of paroxetine decreased by about 27%. The steady-state plasma concentrations of sertraline and desmethylsertraline were not substantially changed when these antidepressant therapies were coadministered with aripiprazole. Aripiprazole dosing was 2 mg/day to 15 mg/day when given with fluoxetine or paroxetine or 2 mg/day to 20 mg/day when given with sertraline.

**USE IN SPECIFIC POPULATIONS:** In general, no dosage adjustment for ABILIFY (aripiprazole) is required on the basis of a patient's age, gender, race, smoking status, hepatic function, or renal function (see Dosage and Administration (2.3) in Full Prescribing Information).

**Pregnancy Category C:** There are no adequate and well-controlled studies in pregnant women. Aripiprazole should be used during pregnancy only if the potential benefit outweighs the potential risk to the fetus. In animal studies, aripiprazole demonstrated developmental toxicity, including possible teratogenic effects in rats and rabbits.

**Labor and Delivery:** The effect of aripiprazole on labor and delivery in humans is unknown.

**Nursing Mothers:** Aripiprazole was excreted in milk of rats during lactation. It is not known whether aripiprazole or its metabolites are excreted in human milk. It is recommended that women receiving aripiprazole should not breast-feed.

**Pediatric Use - Safety and effectiveness in pediatric patients with Major Depressive Disorder has not been established. The efficacy of adjunctive ABILIFY with concomitant lithium or valproate in the treatment of manic or mixed episodes in pediatric patients has not been systematically evaluated. However, such efficacy and lack of pharmacokinetic interaction between aripiprazole and lithium or valproate can be extrapolated from adult data, along with comparisons of aripiprazole pharmacokinetic parameters in adult and pediatric patients.**

**Geriatric Use:** In formal single-dose pharmacokinetic studies (with aripiprazole given in a single dose of 15 mg), aripiprazole clearance was 20% lower in elderly (>65 years) subjects compared to younger adult subjects (18 to 64 years). Also, the pharmacokinetics of aripiprazole after multiple doses in elderly patients appeared similar to that observed in young, healthy subjects. No dosage adjustment is recommended for elderly patients (see also Boxed Warning and Warnings and Precautions).

Of the 13,543 patients treated with oral aripiprazole in clinical trials, 1073 (8%) were 65 years of age and 729 (5%) were >75 years old. The majority (61%) of the 1073 patients were diagnosed with Dementia of the Alzheimer's type.

Placebo-controlled studies of oral aripiprazole in Major Depressive Disorder did not include sufficient numbers of subjects aged 65 and over to determine whether they respond differently than younger subjects.

**Renal Impairment:** In patients with severe renal impairment (creatinine clearance  $<30$  mL/min,  $C_{cr}$  of aripiprazole (given in a single dose of 15 mg) and dehydro-aripiprazole increased by 36% and 33%, respectively, but AUC was 15% lower for aripiprazole and 7% higher for dehydro-aripiprazole. Renal excretion of both unchanged aripiprazole and dehydro-aripiprazole is less than 1% of the dose. No dosage adjustment is required in subjects with renal impairment.

**Hepatic Impairment:** In a single-dose study (15 mg of aripiprazole) in subjects with varying degrees of liver cirrhosis (Child-Pugh Classes A, B, and C), the AUC of aripiprazole, compared to healthy subjects, increased 31% in mild H, increased 8% in moderate H, and decreased 70% in severe H. None of these differences would require dose adjustment.

**Gender:**  $C_{max}$  and AUC of aripiprazole and its active metabolite, dehydro-aripiprazole, are 30% to 40% higher in women than in men, and correspondingly, the apparent oral clearance of aripiprazole is lower in women. These differences, however, are largely explained by differences in body weight (22% between men and women). No dosage adjustment is recommended based on gender.

**Race:** Although no specific pharmacokinetic study was conducted to investigate the effects of race on the disposition of aripiprazole, population pharmacokinetic evaluation revealed no evidence of clinically significant race-related differences in the pharmacokinetics of aripiprazole. No dosage adjustment is recommended based on race.

**Smoking:** Based on studies utilizing human liver enzymes *in vitro*, aripiprazole is not a substrate for CYP1A2 and also does not undergo direct glucuronidation. Smoking status, therefore, not have an effect on the pharmacokinetics of aripiprazole. Consistent with these *in vitro* results, population pharmacokinetic evaluation did not reveal any significant pharmacokinetic differences between smokers and nonsmokers. No dosage adjustment is recommended based on smoking status.

**DRUG ABUSE AND DEPENDENCE - ABILIFY is not a controlled substance.**

**Abuse and Dependence:** Aripiprazole has not been systematically studied in humans for its potential for abuse, tolerance, or physical dependence. While the clinical trials did not reveal any tendency for any drug-seeking behavior, it is not possible to predict on the basis of the limited exposure to the extent to which a CNS-active drug will be misused, diverted, and/or abused once marketed. Patients should be evaluated carefully for a history of drug abuse and closely observed for signs of ABILIFY misuse or abuse.

**OVERDOSEAGE:** 10 cases of deliberate or accidental overdose with oral aripiprazole alone or in combination with other substances were reported worldwide (144 cases with known outcomes, 33 recovered without sequelae and six recovered with sequelae including psychosis and feeling abnormal). Additionally, 10 of these cases were in children (age 12 and younger) involving oral aripiprazole ingestions up to 195 mg with no fatalities. The largest known acute ingestion was 1080 mg of oral aripiprazole (36 times maximum recommended daily dose) in a patient who fully recovered. Common adverse reactions (reported in at least 5% of all overdose cases) were vomiting, somnolence, and tremor. For more information on symptoms of overdose, see Full Prescribing Information.

**Management of Overdose:** No specific information is available on the treatment of overdose with aripiprazole. An electrocardiogram should be obtained in case of overdose and if QT interval prolongation is present, cardiac monitoring should be instituted. Otherwise, management of overdose should concentrate on supportive therapy, maintaining an adequate airway, oxygenation and ventilation, and management of symptoms. Close medical supervision and monitoring should continue until the patient recovers. **Caution:** In the event of an overdose of ABILIFY, an early charcoal administration may be useful in partially preventing the absorption of aripiprazole. Administration of 50 g of activated charcoal, one hour after a single 15 mg oral dose of aripiprazole, decreased the mean AUC and  $C_{max}$  of aripiprazole by 50%. **Hemodialysis:** Although there is no information on the effect of hemodialysis in treating an overdose with aripiprazole, hemodialysis is unlikely to be useful in overdose management since aripiprazole is highly bound to plasma proteins.

**PATIENT COUNSELING INFORMATION: Physicians are advised to discuss the following issues with patients for whom they prescribe ABILIFY: [See Medication Guide in Full Prescribing Information].**

**Increased Mortality in Elderly Patients with Dementia-Related Psychosis:** Advise patients and caregivers of increased risk of death (see Warnings and Precautions).

**Clinical Worsening of Depression and Suicide Risk:** Alert families and caregivers of patients to monitor for the emergence of agitation, irritability, unusual changes in behavior, suicidality and other symptoms as described in Warnings and Precautions and to report such symptoms immediately. Advise patients and their families and caregivers to read the Medication Guide and assist them in understanding its contents (see Warnings and Precautions).

**Interference with Cognitive and Motor Performance:** Because aripiprazole may have the potential to impair judgment, thinking, or motor skills, patients should be cautioned about operating hazardous machinery, including automobiles, until they are reasonably certain that aripiprazole therapy does not affect them adversely (see Warnings and Precautions).

**Pregnancy:** Patients should be advised to notify their physician if they become pregnant or intend to become pregnant during therapy with ABILIFY (see Use in Specific Populations).

**Nursing:** Patients should be advised not to breast-feed an infant if they are taking ABILIFY (see Use in Specific Populations).

**Concomitant Medication:** Patients should be advised to inform their physicians if they are taking, or plan to take, any prescription or over-the-counter drug, since there is a potential for interactions (see Drug Interactions).

**Alcohol:** Patients should be advised to avoid alcohol while taking ABILIFY (see Drug Interactions).

**Heat Exposure and Dehydration:** Patients should be advised regarding appropriate care in avoiding overheating and dehydration (see Warnings and Precautions).

**Sugar Content:** Patients should be advised that each mL of ABILIFY Oral Solution contains 400 mg of sucrose and 200 mg of fructose.

**Phenylethanolamines:** Phenylethanolamine is a component of aripiprazole. Each ABILIFY ODCMELT Orally Disintegrating Tablet contains the following amounts: 10 mg - 1.12 mg phenylethanolamine and 15 mg - 1.66 mg phenylethanolamine.

Tablets manufactured by Otsuka Pharmaceutical Co. Ltd, Tokyo, 101-8535 Japan or Bristol-Myers Squibb Company, Princeton, NJ 08543 USA. Orally Disintegrating Tablets, Oral Solution, and Injection manufactured by Bristol-Myers Squibb Company, Princeton, NJ 08543 USA. Dismbuted and marketed by Otsuka America Pharmaceutical, Inc., Rockville, MD 20850 USA. Marketed by Bristol-Myers Squibb Company, Princeton, NJ 08543 USA. US Patent Nos: 5,008,528; 6,977,257; and 7,115,587

**Bristol-Myers Squibb** **Otsuka** Otsuka America Pharmaceutical, Inc.  
Based on 12/05/02 0308L-1050A BG-00001A-05-00-MDD 57U0508P8501402 0308L-1113  
© 2008, Otsuka Pharmaceutical Co. Ltd, Tokyo, 101-8535 Japan  
Rev May 2008

## NEW FROM JOHNS HOPKINS

### Philosophical Issues in Psychiatry

Explanation, Phenomenology,  
and Nosology

edited by

**Kenneth S. Kendler, M.D., and  
Josef Parnas, M.D., Dr.Med.Sci.**

This multidisciplinary collection explores three key concepts underpinning psychiatry—explanation, phenomenology, and nosology—and their continuing relevance in an age of neuroimaging and genetic analysis.

"Few books on psychiatry explore with seriousness and clarity the difficult problems of explanation, scientific description, and causality. This one does. The introductions are like having an articulate and patient professor at your shoulder. I hope this sophisticated book will be read widely and considered carefully."

—John Z. Sadler, M.D., editor of *Descriptions and Prescriptions: Values, Mental Disorders, and the DSMs*

\$60.00 hardcover

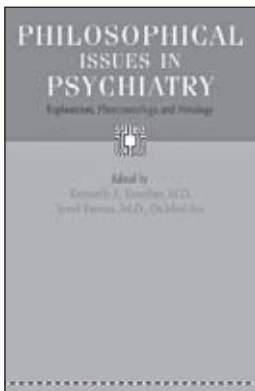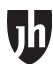

**The Johns Hopkins University Press**

1-800-537-5487 • www.press.jhu.edu

## Osler Institute 134<sup>th</sup> to 140<sup>th</sup> Psychiatry Review Courses

approved for AMA/PRA category 1 credit

### for Written Exams

March 30-April 3, 2009 – Boston

### for Oral Boards

January 12 & 13-15 – San Antonio

March 30 & March 31-April 2 – Boston

June 8 & 9-11 – Denver

### for Recertification Exams

January 10-11 – San Antonio

February 14-15 – Tampa

### for Child and Adolescent

April 1-4, 2009 – Boston

**New – Best of Psych Audio**

**Call Today: (800) 356-7537**

**www.osler.org/y8za**

## AUDIO RECORDINGS

RECORDINGS ARE AVAILABLE FOR:

- ⇒ SYMPOSIA
- ⇒ ADVANCES IN MEDICINE
- ⇒ PRESIDENTIAL SYMPOSIA
- ⇒ LECTURES
- ⇒ ADVANCES IN SERIES
- ⇒ SCIENTIFIC AND CLINICAL REPORTS

The American Psychiatric Association  
161<sup>st</sup> Annual

Meeting is over but CDs and MP3s are still  
available for non-CME sessions.

If you would like a brochure, please contact  
the Scientific Program Office via e-mail at  
[program@psych.org](mailto:program@psych.org);  
phone at 703-907-7808 or visit the Mobiltape  
Web site at [www.mobiltape.com](http://www.mobiltape.com)

JERALD KAY • ALLAN TASMAN • AARON T. BECK • JAMES  
F.T. BUGENTAL • GLEN O. GABBARD • JAY HALEY • OTTO  
KERNBERG • PETER D. KRAMER • TRACEY EELLS • ROBERT  
D. STOLOROW • GEORGE E. VAILLANT • IRVIN YALOM •  
E. JAMES ANTHONY • RICHARD D. CHESSICK • ROBERT  
COLES • HOWARD C. CUTLER • HABIB DAVANLOO • PAUL  
A. DEWALD • JOHN MARKOWITZ • WILLIAM N. NORSKY  
JOHN GOLDSTEIN • PAUL CRITS-CHRISTOPH • RICHARD D.  
ROBERT LANG • ARNOLD M. LUBOWITZ • JAMES F.T. BECK • JAMES  
MENNINGER • JONATHAN WRIGHT • JUDITH WRIGHT • JUDITH  
SPECTOR PERSON • THOMAS S. MOORE • ROBERT D. STOLOROW • JOHN NORCROSS • IRVIN YALOM • E. JAMES  
ANTHONY • RICHARD D. CHESSICK • ROBERT COLES  
HOWARD C. CUTLER • HABIB DAVANLOO • PAUL A. DEWALD  
ROBERT LANGS • PAUL CRITS-CHRISTOPH • TRACY

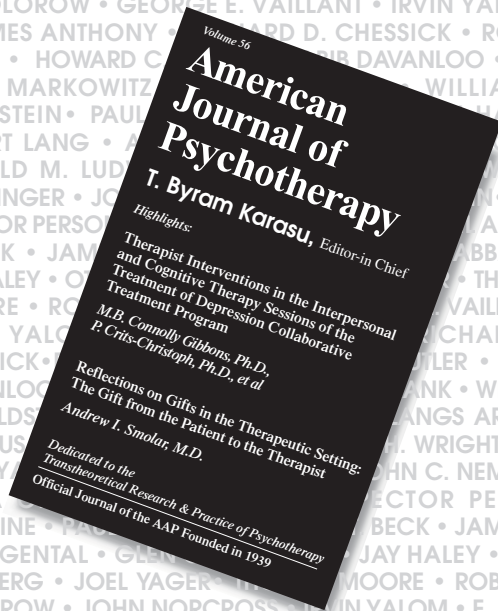

Incorporating the *Journal of Psychotherapy Practice and Research*  
Published four times per annum: *American Journal of Psychotherapy*  
Belfer Center, Room 405 • 1300 Morris Park Avenue • Bronx, NY 10461  
Telephone: (718) 430-3503, FAX: (718) 430-8907  
E-mail: [info@ajp.org](mailto:info@ajp.org); Web site: [www.ajp.org](http://www.ajp.org)

# Effective Treatments and Skill Building in Psychotherapies for the Clinician

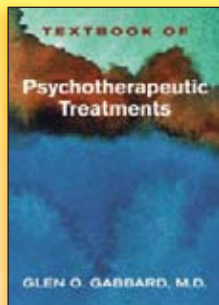

## Textbook of Psychotherapeutic Treatments

Edited by  
Glen O. Gabbard, M.D.

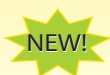

This authoritative work boasts many must-have features:

- All the major psychotherapeutic modalities are addressed, including sections on psychodynamic psychotherapy; cognitive therapy; interpersonal psychotherapy; supportive psychotherapy; family systems therapy; the different modalities of couples, group, and family therapies; dialectical behavioral therapy; and mentalization-based therapy.
- This comprehensive, current overview of the field is versatile and can be used as a textbook for a course; as a reference for the mental health professional who needs to match a specific type of therapy to a particular patient; or as a clinical handbook.
- The sections are structured in a consistent manner, with each featuring individual chapters on theory, technique, indications and efficacy, and the combination of psychotherapy and medication.
- The text provides chapters on the neurobiological underpinnings of psychotherapy—a burgeoning field—and on the nature of professional boundaries in psychotherapy—as indispensable to the student first contemplating personal and professional ethics as to the clinician actively embodying them.

Treatment outcome depends on carefully matching the therapeutic modality to the patient or client. This book will both facilitate and enhance that meticulous process.

2009 • 944 pages • ISBN 978-1-58562-304-4 • Hardcover  
\$95.00 • Item #62304

American  
**Psychiatric**  
Publishing, Inc.

The First and Last Word in Psychiatry

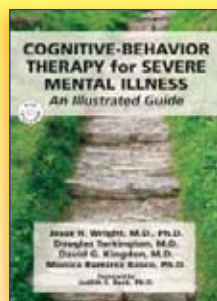

## Cognitive-Behavior Therapy for Severe Mental Illness An Illustrated Guide

Jesse H. Wright, M.D., Ph.D.,  
Douglas Turkington, M.D.,  
David G. Kingdon, M.D., and  
Monica Ramirez Basco, Ph.D.

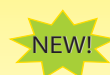

DVD  
Included!

This is the only book to present a comprehensive CBT approach that can be used across the broad range of severe Axis I disorders to prevent relapse, promote treatment adherence, reduce symptoms, and maintain treatment gains. The authors, all internationally recognized experts in using CBT for severe mental illness, provide a host of functional strategies for treating patients with schizophrenia, bipolar disorder, and treatment-refractory depression. The eighteen videos show CBT in action, demonstrating such scenarios as tracing origins of paranoia and formulating an antisuicide plan. Readers seeking to learn or improve their use of CBT for severe mental illness will

- Master the key processes of engaging, assessing, normalizing, educating, and formulating
- Learn methods to help patients reduce delusional thinking, cope with hallucinations, and target hopelessness, suicidality, low energy and interest, and poor self-esteem
- Prevent relapse in bipolar disorder through such methods as monitoring symptoms and promoting good sleep
- Address interpersonal problems common in patients with severe mental illness, showing how to build support and cope with dysfunctional or terminated relationships
- Apply CBT procedures to improve negative symptoms in schizophrenia, such as attention deficit and anhedonia

The book is an ideal companion to the authors' popular introductory text *Learning Cognitive-Behavior Therapy*, building on its critically acclaimed methodology to offer guidelines for effective treatment. This book shows how CBT enhances pharmacotherapy and helps practitioners develop important skills in treating challenging clinical problems.

2009 • 400 pages • ISBN 978-1-58562-321-1 • Paperback  
\$65.00 • Item #62321

# NEW YORK CITY

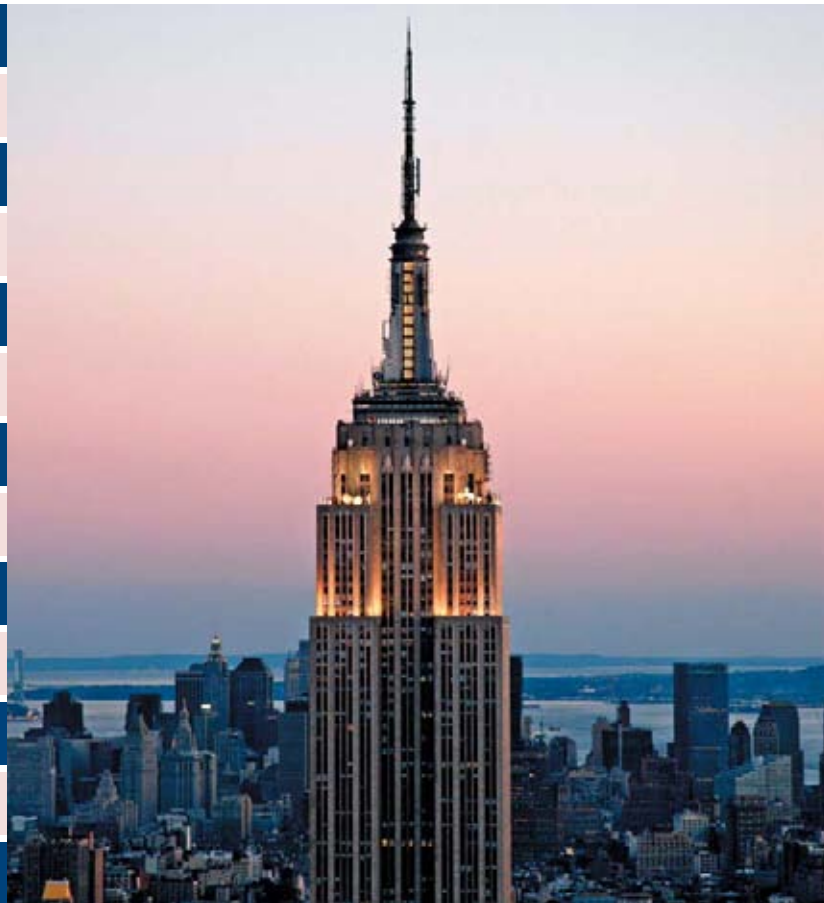

**OCTOBER 8–11, 2009**

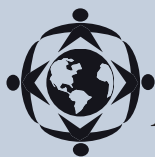

## 61st Institute on Psychiatric Services

*APA's Leading Educational Conference on Public and Community Psychiatry*

*Pride and Practice: Bringing Innovation Into Our Treatments*

### CALL FOR PAPERS

| <u>Format</u>                     | <u>Deadline</u>   |
|-----------------------------------|-------------------|
| Industry-Supported Symposia ..... | December 15, 2008 |
| Innovative Programs.....          | December 15, 2008 |
| Posters.....                      | May 18, 2009      |
| Symposia.....                     | December 15, 2008 |
| Workshops .....                   | December 15, 2008 |

Submissions are accepted **ONLINE ONLY** at [www.psych.org/ips](http://www.psych.org/ips).  
For questions, please call 1-888-357-7924 (toll free) or call 703-907-7300.

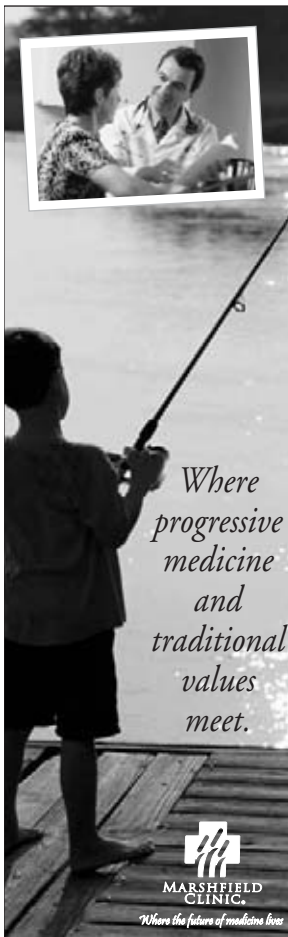

Where  
progressive  
medicine  
and  
traditional  
values  
meet.

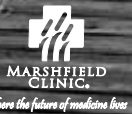

**Marshfield Clinic** is nationally recognized for providing physicians with the most advanced medical equipment and health information technology today. Surrounded by nature's beauty in Wisconsin, we are located in communities where neighbors know one another.

We have openings for **BE/BC Adult Psychiatrists** to join our expanding services. At our Marshfield campus, candidates with fellowship training in neuropsychiatry, geriatric psychiatry or consultative psychiatry are preferred. Additional practice opportunities are also available at our various clinics in Wisconsin. These primarily outpatient practices can be a mix of C/A and adult patients and employ a multidisciplinary team approach.

With over 770 physicians practicing at 43 locations throughout Wisconsin, Marshfield Clinic is the leader in providing high quality health care to the region. We have created an atmosphere for a clinical practice that exceeds most others. We offer physicians an excellent practice in an academic setting with opportunities for research and teaching.

To learn more about these opportunities and the very competitive compensation package, please contact: Beth Albee, Physician Recruitment, **Marshfield Clinic**, 1000 N. Oak Ave., Marshfield, WI 54449. Phone: 800-782-8581, extension 19775; Fax #: 715-221-9779.

E-mail: [albee.beth@marshfieldclinic.org](mailto:albee.beth@marshfieldclinic.org)  
Website: [www.marshfieldclinic.org/recruit](http://www.marshfieldclinic.org/recruit)

Marshfield Clinic is an Affirmative Action/Equal Opportunity employer that values diversity. Minorities, females, individuals with disabilities and veterans are encouraged to apply.

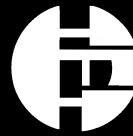

**Harrington  
Memorial Hospital**  
*Total Local Care.*

## Medical Director of Inpatient Psychiatry

Harrington Memorial Hospital seeks a board-certified psychiatrist for the position of Medical Director for our 13-bed inpatient psychiatric services unit. This individual will play a major role in planning, growth, and improvements of the service. The hospital has an integrated program of services including outpatient MH/SA, PES, and respite/crisis stabilization. Harrington Memorial Hospital is a regional hospital that is a teaching affiliate of UMass Medical School. We are located in Central Massachusetts approximately one hour west of Boston. Competitive salary and benefits.

Please respond to:

**Thomas Trask**  
Executive Director of Physician Recruitment

**HARRINGTON MEMORIAL HOSPITAL**  
100 South St., Southbridge MA 01550  
508-765-9771 ext 2424  
[ttrask@harringtonhospital.org](mailto:ttrask@harringtonhospital.org)

An AA/EEO/ADA Employer

[www.harringtonhospital.org](http://www.harringtonhospital.org)

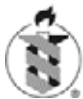

**Beth Israel Deaconess  
Medical Center**

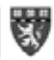

A teaching hospital of  
Harvard Medical School

The Department of Psychiatry at Beth Israel Deaconess Medical Center, a major teaching hospital of Harvard Medical School, is seeking an exceptionally qualified candidate for the full-time position of

### DIRECTOR OF PSYCHOPHARMACOLOGY

This full-time faculty position involves half-time commitment to the Department's Clinical Psychopharmacology Service. Responsibilities include clinical consultation, supervision of psychiatric residents, and service delivery in the Psychiatry Ambulatory Service, as well as clinical consultation in the Inpatient Unit. The appointee will be expected to play a leadership role in the Department's clinical, academic and educational programs, including the Harvard Longwood Psychiatry Residency Training Program.

The position also provides 50% time for clinically oriented research in psychopharmacology. Departmental start-up funds commensurate with experience and scope will be available to assist with development of an externally funded research program in psychopharmacology. Applicants should have at least two years of specialized clinical and research experience in psychopharmacology.

Additional requirements include Board Certification in Psychiatry and eligibility for licensure in Massachusetts. Applicants should send a statement of interest and experience, curriculum vitae, and the names, addresses, phone numbers, and e-mail addresses of three references to:

**David C. Jimerson, M.D., Chair**  
**Psychopharmacology Search Committee**  
**Department of Psychiatry**  
**Beth Israel Deaconess Medical Center**  
**330 Brookline Ave., Boston, MA 02215**  
E-mail: [psychopharm.search@bidmc.harvard.edu](mailto:psychopharm.search@bidmc.harvard.edu)

Correspondence by e-mail is preferred. Women and underrepresented minorities are strongly encouraged to apply. A Harvard Medical School appointment at an appropriate rank is available.

## UTMB Correctional Managed Care

### WANTED: HIGH QUALITY PSYCHIATRISTS

UTMB-CMC employs Psychiatrists at multiple adult and juvenile facilities all over Texas. We currently have multiple locations for child/adolescent experienced psychiatrists. We are heavy users of telepsychiatry using state of the art technology and an electronic medical records.

We are a correctional healthcare system that is setting the standard for others. Correctional Managed Care is among the world's leaders in telemedicine and electronic medical record applications. Innovative programs, creative solutions and participation in the Baldrige National Quality Program further define our organization and help lead us toward performance excellence.

#### Current Opportunities Available

- ✓ BROWNWOOD: Staff Psychiatrist – Youth Services
- ✓ MART: Staff Psychiatrist – Youth Services
- ✓ AUSTIN: Staff Psychiatrist – Telemedicine Center
- ✓ CORSICANA: Staff Psychiatrist – Youth Services
- ✓ Positions also available for Psychiatric Physician Assistants and Nurse Practitioners

#### Compare our benefits with other organizations:

- ✓ Relocation allowance
- ✓ \$2000 CME stipend per fiscal year
- ✓ 5 days paid CME leave
- ✓ Competitive salaries
- ✓ Biannual CMC conferences
- ✓ M-F work schedule-day shift
- ✓ Flexible schedules
- ✓ Limited on-call rotation
- ✓ Professional liability coverage
- ✓ Comprehensive medical coverage
- ✓ Paid vacation, holidays and sick leave
- ✓ State retirement plan in ORP or TRS with State contributions.

Correctional practice eliminates many of the "headaches" of community practice such as dealing with insurance companies including Medicare and Medicaid and malpractice insurance problems.

To learn more about our programs go to:  
[www.utmb.edu/cmc](http://www.utmb.edu/cmc)

To Apply contact Debbe Dansbe 409-747-2619 or 866-900-2622  
or email resume: [dsdansbe@utmb.edu](mailto:dsdansbe@utmb.edu)

UTMB is an EOE/AA Employer M/F/D/V



ASSISTANT/ASSOCIATE PROFESSOR  
(DIRECTOR; INPATIENT ACADEMIC TEACHING UNIT)

The Department of Psychiatry at the University of Illinois (Chicago Campus) is seeking an innovative clinician-educator (tenured or non-tenured) with experience and interest in clinical research to lead a 36 bed adult inpatient unit. This unit has specialty services in women's mental health, psychotic disorders, mood and anxiety disorders, neuropsychiatry and some active clinical research. Interest in clinical research is highly desirable. In addition to work on the inpatient service, a limited amount of clinical work in the ambulatory setting is expected.

This is a full time position on our clinician-educator track. The successful candidate will have had a minimum of three to five years experience providing clinical inpatient care, supervising other attending physicians and staff, building therapeutic milieu and working in a multidisciplinary setting. Experience in clinical administrative activities on an inpatient service or in another clinical milieu is desirable. Interest in teaching and supervising medical students and residents is essential.

Candidates should be Board Certified or Board Eligible in Psychiatry. The successful candidate will be appointed as a faculty member of the Dept of Psychiatry, College of Medicine, rank and salary commensurate with qualifications and experience. Please submit your CV and all contact information along with four letters of recommendation by 12/15/08 to:

Ena Casas  
Department of Psychiatry  
University of Illinois  
1601 W. Taylor Street  
Chicago, Illinois 60612  
E-mail: [ecasas@psych.uic.edu](mailto:ecasas@psych.uic.edu)

UIC IS AN AFFIRMATIVE ACTION/EQUAL OPPORTUNITY EMPLOYER.  
APPLICATIONS FROM WOMEN AND MINORITIES ARE ENCOURAGED.

# CONSULTATION PSYCHIATRIST OPPORTUNITY IN SEATTLE

The Psycho-oncology Division of Swedish Cancer Institute, Seattle's premier cancer-care and clinical research center, is seeking a Consultation Psychiatrist to join our established growing program.

Our Institute supports and encourages psychiatric involvement and leadership. This is an outstanding opportunity to work with a diverse patient population in a multi-disciplinary clinic.

Send your CV to Mike Waters  
at [mike.waters@swedish.org](mailto:mike.waters@swedish.org) or  
call 206-320-5962.

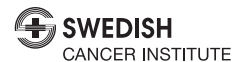

## PSYCHIATRISTS

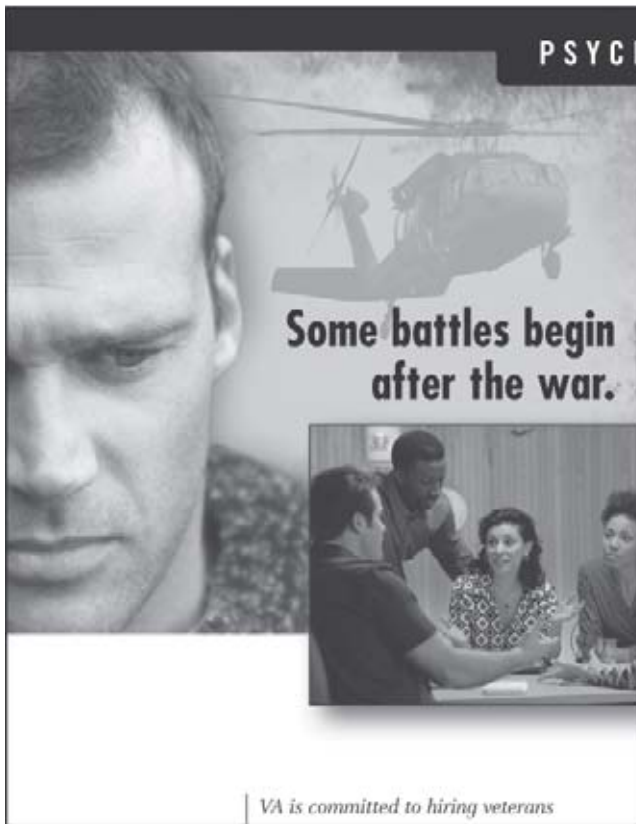

Some battles begin  
after the war.

VA is committed to hiring veterans

Practice innovative psychiatry in  
a world class health care system.

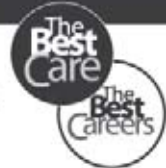

As a VA psychiatrist, you'll be part of an interdisciplinary care team driven to develop innovative approaches to mental health care. You'll translate scientific evidence into daily practice as you tackle one of today's most timely issues – helping America's veterans reclaim their mental health once they've returned from battle.

- VA's practice model is based on care needs, not insurance company regulations
- Diverse professional opportunities
- Computerized patient records
- Your state license allows you to practice at any VA facility, anywhere in the country
- Pay close to local labor market/community pay
- Paid medical liability coverage
- Predictable scheduling
- Excellent health and retirement benefits
- Opportunities for education debt reduction
- Extensive opportunities for continuing education
- 26 days paid vacation accrued annually

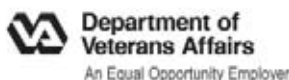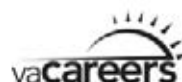

Call toll-free  
1-800-949-0002 or visit  
[www.VAcareers.va.gov/MHP](http://www.VAcareers.va.gov/MHP)

## PSYCHIATRIST

The Department of Psychiatry at The University of Texas Health Science Center at San Antonio (UTHSCSA) seeks a Director of Adult Residency Training. The position is for a full-time board-certified academic psychiatrist at the Associate Professor or Professor level in the tenure or nontenure track.

The ideal candidate will have an emerging or established national reputation, show evidence of leadership and innovation in psychiatric residency training, have outstanding interpersonal skills, and sufficient administrative experience to manage and lead a large residency program.

The fully accredited program includes over 60 residents as well as ACGME approved fellowships in Geriatric and Forensic Psychiatry. Approval is being sought for a Psychosomatic Medicine Fellowship. This unique program includes residency slots from Wilford Hall Air Force Medical Center, University Hospital Health System, and the Audie Murphy Veterans Hospital.

Psychiatry has strong educational, research and clinical programs in an attractive, culturally rich city situated on the edge of the Texas Hill Country, with a pleasant climate, an excellent public school system and abundant recreational activities. Interested individuals should forward their curriculum vitae to:

**Pedro L. Delgado, M.D.**

Professor and Chairman, Department of Psychiatry  
Mail Code 7792

The University of Texas Health Science Center at San Antonio  
7703 Floyd Curl Drive  
San Antonio TX 78229-3900  
Phone: 210-567-5391  
Fax: 210-567-6941

The University of Texas Health Science Center at San Antonio is an Equal Employment Opportunity/Affirmative Action Employer. All faculty appointments are designated as security sensitive positions.

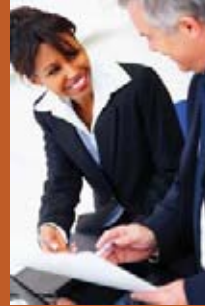

Candidates and Employers  
Connect through the  
**APA Job Bank**

### Employers

- Post your psychiatric position with the APA Job Bank at [www.psych.org/jobbank](http://www.psych.org/jobbank) and reach qualified professionals.
- Use the many resources of the APA Job Bank to make a smart recruitment decision.
- Advertise in the *Psychiatric Services* or *Psychiatric News* classifieds and the APA Job Bank and receive a 10% discount on each.

### Candidates

- Search the most comprehensive online listing of psychiatric positions at [www.psych.org/jobbank](http://www.psych.org/jobbank).
- Register to post your resume, receive instant job alerts, use the career tools and more.
- Visit the APA Job Bank today and find the ideal position.

### Contact:

Pamela Trujillo  
703.907.7330 or [ptrujillo@psych.org](mailto:ptrujillo@psych.org)

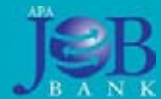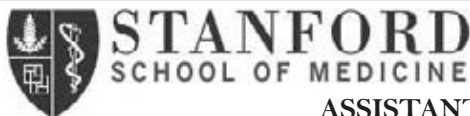

### ASSISTANT PROFESSOR (MEDICAL CENTER LINE) DIVISION OF CHILD & ADOLESCENT PSYCHIATRY AND CHILD DEVELOPMENT PSYCHIATRY AND BEHAVIORAL SCIENCES

The **Stanford University Division of Child & Adolescent Psychiatry and Child Development, Department of Psychiatry and Behavioral Sciences** is seeking a talented Assistant Professor for its Child and Adolescent Mood Disorders Program. This faculty member will specialize in the neurobiology of mood regulation and mood disorder, working alongside outstanding child psychiatric faculty who are specialized in Depressive Disorders and Bipolar Disorders, in an academic environment with very strong resources and collaborative opportunities in neuro-imaging, neurophysiology, genetics, neuroendocrine/neurohormonal function, psychopharmacology, and biostatistics. Faculty in the Division are affiliated with the Lucile Packard Children's Hospital, a first rank clinical and teaching hospital. The **Stanford University School of Medicine** is one of the nation's leading academic and research institutions.

The faculty member will provide expert compassionate clinical care, will teach and supervise Stanford trainees in psychiatry, child psychiatry, clinical psychology, pediatrics, as well as medical students. Major emphasis will be placed on programmatic research in the neurobiology of mood in children and adolescents. This faculty position is in the Medical School's Medical Center Line, which requires excellence in the mix of research, clinical care and teaching and does not confer tenure.

Applicants must have a medical degree or equivalent degree, completed training in both General Psychiatry and Child and Adolescent Psychiatry, be either board eligible or board-certified in both areas by July 2009 and possess or be fully eligible for a California medical license. Candidates should have significant research training and a demonstrated track record in empirical research. Stanford University is an equal opportunity employer and is committed to increasing the diversity of its faculty. It welcomes nominations of and applications from women and members of minority groups, as well as others who would bring additional dimensions to the university's research, teaching and clinical missions. Interested candidates should send a copy via e-mail only of their curriculum vitae, a brief letter outlining their interests and the names of three references to:

**Joachim Hallmayer, M.D.**  
c/o Ellen Van Stone

E-mail: [vanstone@stanford.edu](mailto:vanstone@stanford.edu)

DIVISION OF CHILD & ADOLESCENT PSYCHIATRY AND CHILD DEVELOPMENT  
DEPARTMENT OF PSYCHIATRY & BEHAVIORAL SCIENCES

## PARTNER WITH A MAGNET HOSPITAL

BC/BE Psychiatrist needed to serve as Medical Director of an 11-bed Inpatient Behavioral Health Services Unit and to add capacity for our Outpatient Program.

Call is shared with 5 local psychiatrists. Practice is located at Aspirus Wausau Hospital, named in the top 100 hospitals in the USA by *US News and World Report*. Work with a great team of young, vibrant psychiatrists. There is great potential for program growth and development with a focus on expanded community action. Excellent compensation and benefit package included.

As you work within the open and inviting architecture of Aspirus, you will be part of our outstanding award-winning facility. We invite you to join a first-rate medical community and a family-friendly quality of life in north central Wisconsin.

Please contact Jamie Sitko today at 800-792-8728 or fax CV to 715-847-2742.

Email: [jamiesi@aspirus.org](mailto:jamiesi@aspirus.org)

[www.aspirus.org](http://www.aspirus.org)

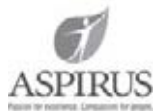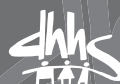

NC DEPARTMENT OF  
HEALTH AND HUMAN SERVICES  
[www.ncdhhs.gov](http://www.ncdhhs.gov)

### Looking for meaningful work? A balance between work and life?

At the North Carolina Department of Health and Human Services...

### Optimal Work Scheduling = Optimum Quality of Life

At DHHS, you can experience the satisfaction of serving the psychiatric needs of NC citizens and work in affiliation with prominent residency programs, such as University of NC, Duke University, and Wake Forest University.

NC DHHS not only offers competitive salaries and comprehensive benefits, but options and incentives to fit your work-life needs.

These include:

- **Loan Repayment Program**
- **High Needs Bonus**
- **Flexible and Part-Time Scheduling**
- **Special Pay Incentives for additional hours worked**
- **Medical Malpractice Insurance**

For more information visit: [www.ncdhhs.gov/](http://www.ncdhhs.gov/)

Contact John Grimes at (919) 733-2940

or [john.grimes@ncmail.net](mailto:john.grimes@ncmail.net)

North Carolina State Government Employer of Choice • EEO/AA Employer

## PSYCHIATRIC CLINICIANS AND HOSPITALISTS SCOTT & WHITE HEALTHCARE - CENTRAL TEXAS

### DEPARTMENT OF MENTAL HEALTH SERVICES

Scott & White and Texas A&M College of Medicine are seeking outstanding BC/BE individuals for the positions of Psychiatric Clinicians and Hospitalists within the Department of Mental Health Services at our main campus in Temple, TX. Candidates for this position should have strong credentials in clinical care and education, with inpatient psychiatric patient care experience. Academic responsibilities will include opportunities to mentor medical students and residents in basic psychiatric concepts, as well as delivering high quality health care to all population groups.

Led by physicians with a commitment to patient care, education and research, Scott & White is listed among the "Top 100 Hospitals" in America. Scott & White Health System serves as the clinical educational site for The Texas A&M University System Health Science Center College of Medicine.

Scott & White offers a competitive salary and comprehensive benefit package, which begins with four weeks vacation, three weeks CME and a generous retirement plan. For additional information, please call or send your CV to: Kathryn Kotrla, MD, Chair, Department of Mental Health Services, c/o Jason Culp, Physician Recruiter, Scott & White Clinic, 2401 S. 31st, Temple, TX 76508. Phone: (800) 725-3627; email: [jculp@swmail.sw.org](mailto:jculp@swmail.sw.org). A formal application must be completed to be considered for this position.

For more information on Scott & White, please visit our web site at: [www.sw.org](http://www.sw.org). Scott & White is an equal opportunity employer.

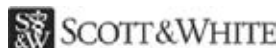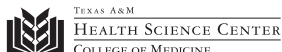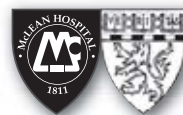

### McLean Hospital Director, Neuroimaging Center

McLean Hospital, Partners HealthCare System, and the Department of Psychiatry, Harvard Medical School, are inviting applications from qualified applicants with research interests relevant to psychiatric neuroimaging and neuroscience for the position of Director of McLean Hospital's Neuroimaging Center and for academic appointment either as Professor of Psychiatry or Associate Professor of Psychiatry. The candidate should have a strong record of NIH funding for research programs, a record of mentoring fellows and junior faculty, and an interest in establishing collaborations with other investigators within the facility and across Harvard Medical School and the Partners HealthCare System, including the Massachusetts General Hospital and Brigham and Women's Hospital.

This position requires an M.D. or Ph.D. degree with a strong background in magnetic resonance imaging modalities, including fMRI, MR spectroscopy and structural methods including DTI, and in the neuroscience field with an interest in the pathophysiological mechanisms of psychiatric illnesses. Depending upon qualifications, applicants must either meet the academic criteria for appointment at the rank of Professor or Associate Professor in the Department of Psychiatry at Harvard Medical School. Qualified women and minority candidates are encouraged to apply. Review of applications will begin immediately and continue until the position is filled.

Salary and recruitment package will be commensurate with qualifications and experience, and in accordance with institutional guidelines. Applicants should submit a curriculum vitae and a concise statement of research interests to the search committee chair:

**Scott L. Rauch, M.D., President and Psychiatrist in Chief, c/o Peter Paskevich, Senior Vice President for Research Administration, McLean Hospital, 115 Mill St., Belmont, MA 02478. Email: [ppaskevich@mclean.harvard.edu](mailto:ppaskevich@mclean.harvard.edu)**

A Member of the PARTNERS HealthCare System

McLean Hospital, Partners HealthCare System and the Harvard Medical School are Affirmative Action/Equal Employment Opportunity/ADA employers.

## FELLOWSHIP OPENINGS

### 2009 - 2010 Fellowship in Public Services Psychiatry

The University of Pennsylvania Department of Psychiatry announces the creation of The Center of Excellence and Innovation in Public Psychiatry. The Center is offering subspecialty training for psychiatrists who plan careers in the public sector. Two one- or two-year post residency fellowships are available annually beginning in July 2009. The core of the fellowship consists of supervised work at collaborating public sector agencies in Philadelphia. Field placement is complemented by an academic curriculum that teaches clinical, leadership and administrative / management skills that will provide fellows with the tools and expertise to become part of the next generation of leaders in public psychiatry. Independent research projects are an integral part of this fellowship. In addition there are opportunities to earn MS and MPH degrees as part of the fellowship experience.

Faculty: Cordula Holzer, MD, Medical Director of Horizon House and Clinical Associate Professor at the University of Pennsylvania is Director of the Center of Excellence and Innovation in Public Psychiatry. Trevor Hadley, PhD, Director of the Center for Mental Health Policy and Services Research (CMHPSR) serves as the primary mentor for fellows' research activities along with other investigators at CMHPSR. Anthony Rostain, MD, MA, Director of Education for the Department of Psychiatry, serves as primary liaison to departmental and medical school teaching programs. Additional clinical supervision will be provided by mentors recruited from the ranks of Philadelphia community psychiatrists.

Salary for the first year of the fellowship will be \$75,000 plus benefits. Additional funding is available for conference and educational activities. Interested applicants should contact Dr. Cordula Holzer at holzerc@mail.med.upenn.edu

Further information and applications are available at the website of the CMHPSR: <http://www.med.upenn.edu/cmhpsr/fellowship.html>.

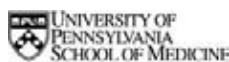

## ASSISTANT/ ASSOCIATE PROFESSOR (ATTENDING PHYSICIAN FOR INPATIENT TEACHING UNIT)

Assistant/ Associate Professor or rank comm. with experience (Attending Physician for Inpatient Teaching Unit). The Department of Psychiatry at the University of Illinois (Chicago Campus) is actively seeking applications from dynamic, academically-oriented clinician educators for the position of inpatient attending physician.

This is a tenured or non-tenured full-time position on our teacher educator track that will include direct patient care and supervision of residents on an active specialty-oriented inpatient unit, as well as limited outpatient clinical practice.

The successful candidate will have a demonstrated track record or interest in teaching residents and medical students as well as treating/managing acutely ill patients in an inpatient clinical milieu. Interest in mood and anxiety disorders, psychotic disorders, geriatrics, neuropsychiatry or general psychiatry are all areas that will fit into our current team structure.

Candidates should be Board Certified or Eligible in Psychiatry. The successful candidate will be appointed as a faculty member of the Dept of Psychiatry, College of Medicine. Rank and salary commensurate with qualifications and experience.

Please submit your CV and all contact information along with four letters of recommendation by 12/15/08 to:

**Ena Casas**

**Department of Psychiatry  
University of Illinois  
1601 W. Taylor Street  
Chicago, Illinois 60612.**

**E-mail: [ecasas@psych.uic.edu](mailto:ecasas@psych.uic.edu)**

UIC IS AN AFFIRMATIVE ACTION/EQUAL OPPORTUNITY EMPLOYER.  
APPLICATIONS FROM WOMEN AND MINORITIES ARE ENCOURAGED.

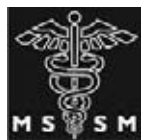

MOUNT SINAI  
SCHOOL OF  
MEDICINE

[www.mssm.edu](http://www.mssm.edu)

The Mount Sinai School of Medicine is internationally acclaimed for excellence in clinical care, education, and scientific research.

## CHAIR OF PSYCHIATRY

In this highly visible role, you will be responsible for leadership in teaching, research, clinical services, and management of all resources in the Department and will serve a broad leadership role within Mount Sinai School of Medicine and its affiliated hospitals. Candidate must have outstanding clinical and scholarly achievements, a deep commitment to academic excellence, demonstrated leadership skills, and a vision for the further development of the discipline of psychiatry in an academic and community setting.

The MSSM was founded in 1968 and is now ranked 18th in total NIH research funding. The Department of Psychiatry has more than 600 faculty (full-time, part-time and voluntary). It houses internationally respected programs in schizophrenia, personality disorders, autism, depression, substance abuse, attention deficit disorder, impulsive and compulsive disorders, stress and anxiety disorders, geriatrics, memory disorders and Alzheimer's disease. The Department is in the top 10 of NIH funding for psychiatry departments nationwide.

Requires a M.D. or M.D.-Ph.D. along with exceptional leadership ability.

We offer a competitive salary and an excellent benefits package. Please send CV and a list of references to: **Karen Sadock, Staff to the Psychiatry Chair Search Committee, Mount Sinai School of Medicine, One Gustave L. Levy Place, Box 1217, New York, NY 10029-6574. Email: [Karen.sadock@mssm.edu](mailto:Karen.sadock@mssm.edu).** Visit our website at [www.mssm.edu](http://www.mssm.edu). Mount Sinai Medical Center is an equal opportunity/affirmative action employer. We recognize the power and importance of a diverse employee population and strongly encourage applicants with various experiences and backgrounds.

DEPARTMENT OF VETERANS AFFAIRS VETERANS  
HEALTH ADMINISTRATION

**PSYCHIATRISTS**

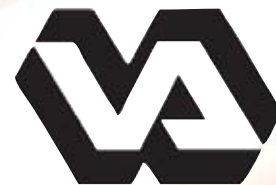

Our Health Care System is currently accepting applications for psychiatrists in the following locations and programs:

Marion, IL

Outpatient Psychiatry  
Mental Health in Primary Care / Consultation Liaison  
Mental Health Intensive Case Management (MHICM)  
PTSD Clinical Team

Owensboro, KY

Outpatient Psychiatry

Paducah, KY

Outpatient Psychiatry

Mayfield, KY

Outpatient Psychiatry

Applicants selected for these positions may be eligible for a recruitment incentive and the maximum award consideration under the Federal Education Debt Reduction Program. In addition to annual salary, performance pay may be awarded at the end of each fiscal year.

For application, benefit, or salary information please contact:

VA Health Care System  
Human Resources  
2401 West Main Street  
Marion, IL 62959  
Phone: 618-993-4128  
Fax: 618-993-4148  
or visit: [www.usajobs.opm.gov](http://www.usajobs.opm.gov)

Benefits: 26 days of paid vacation/personal leave; 13 days of paid sick leave; 15 days of paid military leave; 10 paid Federal holidays; Family and Medical Leave; Liability protection; Group health insurance plans with the majority of premiums paid by the Federal government; Term life insurance, family, and additional coverage options; Federal Employees Retirement System (FERS); Thrift Savings Plan (TSP) – 401K; Flexible Spending Accounts (FSA).

FOR PROGRAM SPECIFIC INFORMATION, YOU MAY CONTACT DR. LISA MCCUTCHEN, DIRECTOR OF BEHAVIORAL MEDICINE AT 618-993-4161 OR [LISA.MCCUTCHEN@VA.GOV](mailto:LISA.MCCUTCHEN@VA.GOV).

POSITIONS SUBJECT TO RANDOM DRUG TESTING. U.S. CITIZENSHIP REQUIRED OR CANDIDATES MUST HAVE PROPER AUTHORIZATION TO WORK IN THE UNITED STATES.

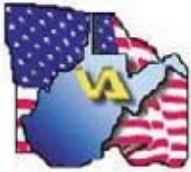

## Louis A. Johnson VA Healthcare System

*Serving those who have served...*

The Louis A. Johnson VA Healthcare System is actively recruiting highly motivated and dedicated professionals to join our Behavioral Medicine & Rehabilitation Service Team. Our progressive healthcare system includes the VA Medical Center in Clarksburg, WV, four Community Based Outpatient Clinics in Braxton, Tucker, Wood and Monongalia counties, plus a Community & Rural Healthcare Mobile Clinic. Successful candidates will join a team of highly skilled professionals who provide acute psychiatry and a broad scope of outpatient behavioral medicine services to veterans in north central West Virginia and surrounding counties of Ohio, Pennsylvania and Maryland.

### We are currently recruiting for Psychiatrists and Psychologists for the Behavioral Medicine & Rehabilitation Service Team.

The Clarksburg, WV area offers the tranquility of rural living with ready access to metropolitan areas of Pittsburgh, PA, Washington, DC and Charleston, WV. The Louis A. Johnson VA Healthcare System is a healthcare leader in the community and offers an attractive recruitment and benefit package including:

- Competitive salary rates and performance pay
- Generous vacation and sick leave
- Life and health insurance
- 401(K) type retirement plan with matching funds in addition to Federal Retirement Funds
- Education Debt Reduction Fund
- Affiliation with the West Virginia University School of Medicine
- Malpractice coverage provided at no cost to the employee
- On-site parking
- Education and career advancement

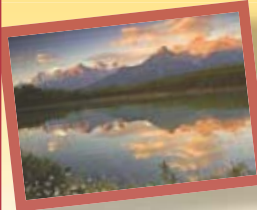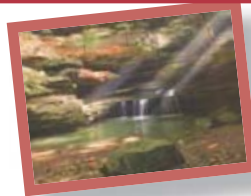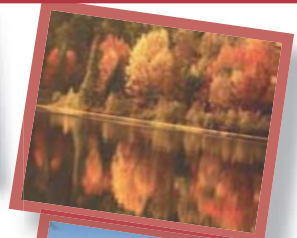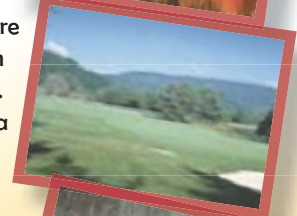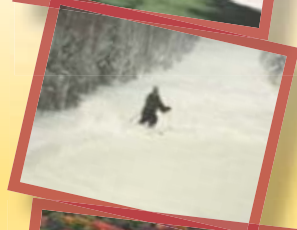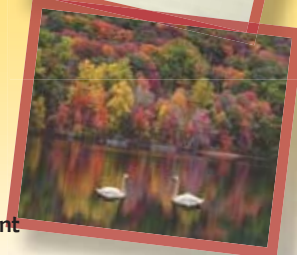

**In addition, Recruitment & Relocation incentives may be offered. Please contact Dr. Glenn Snider, CO# at (304) 623-3461 ext. 3206. For more information visit [www.usajobs.gov](http://www.usajobs.gov)**

EOE

EOE

## APA Member Benefits and Services That Make a Difference

- **Bank of America Credit Cards and Financial Tools** — Earn WorldPoints™ Rewards
- **APA Job Bank** — Online career search and recruitment
- **The Psychiatrists' Program** — Medical malpractice insurance for psychiatrists
- **Car Rentals** — Substantial discounts from Alamo, Avis, Budget, Hertz, or National
- **Solveras Payment Systems** — Affordable tools to effectively manage patient payments
- **Magazine Subscriptions** — Save up to 50% off regular subscription rates on magazines
- **Retirement and Investment Planning** — Meet your short and long-term retirement and financial planning goals
- **Legal Consultation** — Find money-saving legal advice with APA's Legal Consultation Plan

Learn more about these benefits and savings at [www.psych.org/members-corner](http://www.psych.org/members-corner)

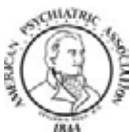

**Questions?** Contact APA Answer Center

Call Toll-Free: **1-888-35-PSYCH**

From outside the U.S. and Canada call: **1-703-907-7300**

Email: [apa@psych.org](mailto:apa@psych.org)

## The American Psychiatric Publishing Textbook of Psychiatry, Fifth Edition

Edited by Robert E. Hales, M.D., M.B.A.,  
Stuart C. Yudofsky, M.D., and  
Glen O. Gabbard, M.D.

With Foreword by Alan F. Schatzberg, M.D.

An indispensable resource for clinical psychiatrists studying for Part I of the American Board of Psychiatry and Neurology exam, *The American Psychiatric Publishing Textbook of Psychiatry* is a proven teaching tool and an essential component of every practitioner's library.

April 2008 • 1,904 pages • ISBN 978-1-58562-257-3  
Hardcover • \$285.00 • Item #62257

Order Online: [www.appi.org](http://www.appi.org)

Toll Free: 1-800-368-5777 • Fax: 703-907-1091

Email: [appi@psych.org](mailto:appi@psych.org)

Priority Code AH830

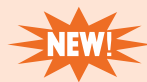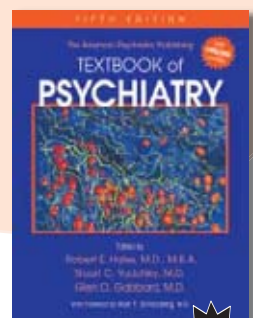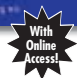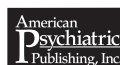

The First and Last Word in Psychiatry  
1000 Wilson Boulevard, Suite 1825, Arlington, VA 22209-3901

# Index to Advertiser December 2008

The publication of an advertisement in this journal does not imply endorsement of the product or service by the American Psychiatric Association.

American Journal of Psychotherapy.....A21

Bristol-Myers Squibb Company

Abilify .....A15-A20

Eli Lilly and Company

Zyprexa.....A1

Employment Opportunities .....A26-A33

John Hopkins University Press .....A21

Osler Institute .....A21

U.S. Pharmaceuticals, Pfizer, Inc.

Geodon .....A9-A10

Geodon IM .....A11-A12

Wyeth Pharmaceuticals

Pristiq .....A34-C4

The University of Louisville School of Medicine  
Department of Psychiatry and Behavioral Sciences

## Clinician-Educators Positions Available

Addiction Psychiatry | Emergency Psychiatry | Center for Autism  
General Adult Psychiatry | Child and Adolescent Psychiatry  
Geriatric Psychiatry | Depression Center | Women's Mental Health

The Department of Psychiatry and Behavioral Sciences is seeking academically-oriented psychiatrists to join our faculty in a rapidly growing medical center complex. The city of Louisville is a metropolitan area with nearly one million people. The cost of living is low, cultural amenities are extensive and schools are excellent.

Clinical duties for these faculty positions generally include a combination of inpatient, outpatient, or work in our psychiatric emergency services or consult/liaison service. The successful candidate will have a demonstrated interest in teaching residents and medical students. There are opportunities to collaborate in clinical and basic science research. Candidates should be Board Certified or Board Eligible in Psychiatry. These positions are full-time faculty appointments. Academic rank and salary are commensurate with qualifications and experience, and a comprehensive benefits package is included.

Interested candidates should mail or e-mail a curriculum vitae and a letter of interest to:

Kelly Moore, Faculty Affairs Coordinator  
Department of Psychiatry and Behavioral Sciences  
401 E. Chestnut Street, Suite 610  
Louisville, KY 40202  
P: 502-813-6664; F: 502-813-6665; kelly.moore@louisville.edu

The University of Louisville is an Affirmative Action, Equal Opportunity, Americans with Disabilities Employer, committed to diversity and in that spirit, seeks applications from a broad variety of candidates.

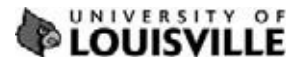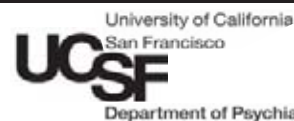

## UNIVERSITY OF CALIFORNIA SAN FRANCISCO CLINICAL AND TRANSLATIONAL RESEARCHERS

THE DEPARTMENT OF PSYCHIATRY AT THE UNIVERSITY OF CALIFORNIA, SAN FRANCISCO invites applications for Clinical and Translational Researchers (**two positions available**). Applicants must have an M.D. and/or Ph.D., and have established skills in—and dedication to—clinical and translational research relevant to mental illness in adults. Physicians must be board certified in Psychiatry and licensed to practice medicine in California at time of appointment. While applicants at the Assistant to Associate Professor level are preferred, the positions will be filled at an academic rank commensurate with experience, in the In-Residence or academic series commensurate with experience, and could begin on **March 1, 2009** or thereafter.

Responsibilities include launching a successful program in clinical and translational psychiatric research, and participation in teaching, supervision or support of educational programs for medical students, residents, psychology interns, or postdoctoral fellows in a variety of disciplines. Applicants should have extramural funding. Applicants should submit their application electronically—including CV, statement of research interest, three representative journal articles, and three letters of reference to:

**Kristine Yaffe, MD, Search Committee Chair**  
c/o Astrid Prackatzsch at [astridp@lppi.ucsf.edu](mailto:astridp@lppi.ucsf.edu)

Applications will be accepted until the positions are filled. UCSF seeks candidates whose experience, teaching, research, or community service has prepared them to contribute to our commitment to diversity and excellence.

*UCSF is an Equal Opportunity/Affirmative Action Employer. The University undertakes affirmative action to assure equal employment opportunity for underrepresented minorities and women, for persons with disabilities, and for covered veterans. All qualified applicants are encouraged to apply, including minorities and women.*

## Subscription and Business Information

The American Journal of Psychiatry, ISSN 0002-953X, is published monthly by the American Psychiatric Association, 1000 Wilson Blvd., Suite 1825, Arlington, VA 22209-3901. Subscriptions (per year): individual \$205.00, international \$308.00. For additional subscription options, including single issues and student rates, please contact Customer Service at 1-800-368-5777 or email [appi@psych.org](mailto:appi@psych.org). Institutional subscriptions are tier priced. For institutional site license or pricing information, contact Customer Service or visit <http://highwire.stanford.edu/tfocis/>.

Business communications, address changes, and subscription questions from APA members should be directed to the Division of Member Services: (888) 35-PSYCH (toll-free). Nonmember subscribers should call the Circulation Department (800) 368-5777. Author inquiries should be directed to the Journal editorial office: (703) 907-7885 or (703) 907-7884; fax (703) 907-1096; e-mail [ajp@psych.org](mailto:ajp@psych.org).

Business Management: Nancy Frey, Director, Publishing Services; Laura G. Abedi, Associate Director, Production; Brian Skepton, Advertising Sales and Marketing Manager, Nonpharmaceutical and Online Sales; Alison Jones, Advertising Prepress Manager; Robert Pursell, Director, Sales and Marketing.

Director, Advertising Sales: Raymond J. Purkis, Director, 2444 Morris Avenue, Union, NJ 07083; (908) 964-3100.

Pages are produced using Adobe FrameMaker+ SGML 6.0. Printed by RR Donnelley, Mendota, IL., on acid-free paper effective with Volume 164, Number 11, November 2007.

Periodicals postage paid at Arlington, VA, and additional mailing offices. POSTMASTER: Send address changes to The American Journal of Psychiatry, Circulation Department, American Psychiatric Association, 1000 Wilson Blvd., Suite 1825, Arlington, VA 22209-3901.

Indexed in Abstracts for Social Workers, Academic Abstracts, Biological Abstracts, Chemical Abstracts, Chicago Psychoanalytic Literature Index, Cumulative Index to Nursing Literature, Excerpta Medica, Hospital Literature Index, Index Medicus, International Nursing Index, Nutrition Abstracts, Psychological Abstracts, Science Citation Index, Social Science Source, and Social Sciences Index.

The American Psychiatric Association does not hold itself responsible for statements made in its publications by contributors or advertisers. Unless so stated, material in The American Journal of Psychiatry does not reflect the endorsement, official attitude, or position of the American Psychiatric Association or of the Journal's Editorial Board.

Authorization to photocopy items for internal or personal use, or the internal or personal use of specific clients, is granted by the American Psychiatric Association for libraries and other users registered with the Copyright Clearance Center (CCC) Transactional Reporting Service, provided that the base fee of \$15.00 per copy is paid directly to CCC, 222 Rosewood Drive, Danvers, MA 01923; (978) 750-8400 (tel), (978) 646-8600 (fax), [www.copyright.com](http://www.copyright.com) (web site). 0002-953X/05/\$15.00.

This consent does not extend to other kinds of copying, such as copying for general distribution, for advertising or promotional purposes, for creating new collective works, or for resale. Requests for commercial distribution should be directed to (703) 907-7894. APA does not require that permission be obtained for the photocopying of isolated articles for nonprofit classroom or library reserve use; all fees associated with such permission are waived.

Copyright © 2008 American Psychiatric Association.

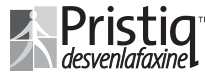

Extended-Release Tablets

**BRIEF SUMMARY.** See package insert for full Prescribing Information. For further product information and current package insert, please visit [www.wyeth.com](http://www.wyeth.com) or call our medical communications department toll-free at 1-800-934-5556.

### **WARNING: Suicidality and Antidepressant Drugs**

**Antidepressants increased the risk compared to placebo of suicidal thinking and behavior (suicidality) in children, adolescents, and young adults in short-term studies of Major Depressive Disorder (MDD) and other psychiatric disorders. Anyone considering the use of Pristiq or any other antidepressant in a child, adolescent, or young adult must balance this risk with the clinical need. Short-term studies did not show an increase in the risk of suicidality with antidepressants compared to placebo in adults beyond age 24; there was a reduction in risk with antidepressants compared to placebo in adults aged 65 and older. Depression and certain other psychiatric disorders are themselves associated with increases in the risk of suicide. Patients of all ages who are started on antidepressant therapy should be monitored appropriately and observed closely for clinical worsening, suicidality, or unusual changes in behavior. Families and caregivers should be advised of the need for close observation and communication with the prescriber. Pristiq is not approved for use in pediatric patients [see Warnings and Precautions (5.1), Use in Specific Populations (8.4), and Patient Counseling Information (17.1) in the full prescribing information].**

**INDICATIONS AND USAGE:** Pristiq, a selective serotonin and norepinephrine reuptake inhibitor (SNRI), is indicated for the treatment of major depressive disorder (MDD).

**CONTRAINDICATIONS: Hypersensitivity-**Hypersensitivity to desvenlafaxine succinate, venlafaxine hydrochloride or to any excipients in the Pristiq formulation. **Monoamine Oxidase Inhibitors-**Pristiq must not be used concomitantly in patients taking monoamine oxidase inhibitors (MAOIs) or in patients who have taken MAOIs within the preceding 14 days due to the risk of serious, sometimes fatal, drug interactions with SNRI or SSRI treatment or with other serotonergic drugs. Based on the half-life of desvenlafaxine, at least 7 days should be allowed after stopping Pristiq before starting an MAOI [see Dosage and Administration (2.5) in the full prescribing information].

**WARNINGS AND PRECAUTIONS: Clinical Worsening and Suicide Risk-**Patients with major depressive disorder (MDD), both adult and pediatric, may experience worsening of their depression and/or the emergence of suicidal ideation and behavior (suicidality) or unusual changes in behavior, whether or not they are taking antidepressant medications, and this risk may persist until significant remission occurs. Suicide is a known risk of depression and certain other psychiatric disorders, and these disorders themselves are the strongest predictors of suicide. There has been a long-standing concern, however, that antidepressants may have a role in inducing worsening of depression and the emergence of suicidality in certain patients during the early phases of treatment. Pooled analyses of short-term placebo-controlled studies of antidepressant drugs (SSRIs and others) showed that these drugs increase the risk of suicidal thinking and behavior (suicidality) in children, adolescents, and young adults (ages 18-24) with major depressive disorder (MDD) and other psychiatric disorders. Short-term studies did not show an increase in the risk of suicidality with antidepressants compared to placebo in adults beyond age 24; there was a reduction with antidepressants compared to placebo in adults aged 65 and older. The pooled analyses of placebo-controlled studies in children and adolescents with MDD, obsessive compulsive disorder (OCD), or other psychiatric disorders included a total of 24 short-term studies of 9 antidepressant drugs in over 4,400 patients. The pooled analyses of placebo-controlled studies in adults with MDD or other psychiatric disorders included a total of 295 short-term studies (median duration of 2 months) of 11 antidepressant drugs in over 77,000 patients. There was considerable variation in risk of suicidality among drugs, but a tendency toward an increase in the younger patients for almost all drugs studied. There were differences in absolute risk of suicidality across the different indications, with the highest incidence in MDD. The risk differences (drug vs. placebo), however, were relatively stable within age strata and across indications. These risk differences (drug-placebo difference in the number of cases of suicidality per 1000 patients treated) are provided in Table 1 of the full prescribing information. No suicides occurred in any of the pediatric studies. There were suicides in the adult studies, but the number was not sufficient to reach any conclusion about drug effect on suicide. It is unknown whether the suicidality risk extends to longer-term use, i.e., beyond several months. However, there is substantial evidence from placebo-controlled maintenance studies in adults with depression that the use of antidepressants can delay the recurrence of depression. **All patients being treated with antidepressants for any indication should be monitored appropriately and observed closely for clinical worsening, suicidality, and unusual changes in behavior, especially during the initial few months of a course of drug therapy, or at times of dose changes, either increases or decreases.** The following symptoms, anxiety, agitation, panic attacks, insomnia, irritability, hostility, aggressiveness, impulsivity, akathisia (psychomotor restlessness), hypomania, and mania, have been reported in adult and pediatric patients being treated with antidepressants for major depressive disorder as well as for other indications, both psychiatric and nonpsychiatric. Although a causal link between the emergence of such symptoms and either the worsening of depression and/or the emergence of suicidal impulses has not been established, there is concern that such symptoms may represent precursors to emerging suicidality. Consideration should be given to changing the therapeutic regimen, including possibly discontinuing the medication, in patients whose depression is persistently worse, or who are experiencing emergent suicidality or symptoms that might be precursors to worsening depression or suicidality, especially if these symptoms are severe, abrupt in onset, or were not part of the patient's presenting symptoms. If the decision has been made to discontinue treatment, medication should be tapered, as rapidly as is feasible, but with recognition that abrupt discontinuation can be associated with certain symptoms [see Warnings and Precautions (5.9) and Dosage and Administration (2.3) in the full prescribing information for a description of the risks of discontinuation of Pristiq]. Families and caregivers of patients being treated with antidepressants for major depressive disorder or other indications, both psychiatric and nonpsychiatric, should be alerted about the need to monitor patients for the emergence of agitation, irritability, unusual changes in behavior, and the other symptoms described above, as well as the emergence of suicidality, and to report such symptoms immediately to health care providers. Such monitoring should include daily observation by families and caregivers. Prescriptions for Pristiq should be written for the smallest quantity of tablets consistent with good patient management, in order to reduce the risk of overdose. **Screening patients for bipolar disorder-** A major depressive episode may be the initial presentation of bipolar disorder. It is generally believed (though not established in controlled studies) that treating such an episode with an antidepressant alone may increase the likelihood of precipitation of a mixed/manic episode in patients at risk for bipolar disorder. Whether any of the symptoms described above represent such a conversion is unknown. However, prior to initiating treatment with an antidepressant, patients with depressive symptoms should be adequately screened to determine if they are at risk for bipolar disorder; such screening should include a detailed psychiatric history, including a family history of suicide, bipolar disorder, and depression. It should be noted that Pristiq is not approved for use in treating bipolar depression. **Serotonin Syndrome-**The development of a potentially life-threatening serotonin syndrome may occur with Pristiq treatment, particularly with concomitant use of other serotonergic drugs (including SSRIs, SNRIs and triptans) and with drugs that impair metabolism of serotonin (including MAOIs). The concomitant use of Pristiq and MAOIs is contraindicated [see Contraindications (4.2)]. If concomitant treatment with Pristiq and an SSRI, another SNRI or a 5-hydroxytryptamine receptor agonist (triptan) is clinically warranted, careful observation of the patient is advised, particularly during treatment initiation and dose increases. The concomitant use of Pristiq with serotonin precursors (such as tryptophan supplements) is not recommended. **Elevated Blood Pressure-**Patients receiving Pristiq should have regular monitoring of blood pressure since dose-dependent increases were observed in clinical studies. Pre-existing hypertension should be controlled before initiating treatment with Pristiq. Caution should be exercised in treating patients with pre-existing hypertension or other underlying conditions that might be compromised by increases in blood pressure. Cases of elevated blood pressure requiring immediate treatment have been reported with Pristiq. **Sustained hypertension-** Sustained blood pressure increases could have adverse consequences. For patients who experience a sustained increase in blood pressure while receiving Pristiq, either dose reduction or discontinuation should be considered [see Adverse Reactions (6.1)]. Treatment with Pristiq in controlled studies was associated with sustained hypertension, defined as treatment-emergent supine diastolic blood pressure (SDBP)  $\geq 90$  mm Hg and  $\geq 10$  mm Hg above baseline for 3 consecutive on-therapy visits. In clinical studies, regarding the proportion of patients with sustained hypertension, the following rates were observed: placebo (0.5%), Pristiq 50 mg (1.3%), Pristiq 100 mg (0.7%), Pristiq 200 mg (1.1%), and Pristiq 400 mg (2.3%). Analyses of patients in Pristiq controlled studies who met criteria for sustained hypertension revealed a dose-dependent increase in the proportion of patients who developed sustained hypertension. **Abnormal Bleeding-**SSRIs and SNRIs can increase the risk of bleeding events. Concomitant use of aspirin, other drugs that affect platelet function, nonsteroidal anti-inflammatory drugs, warfarin, and other anticoagulants can add to this risk. Bleeding events related to SSRIs and SNRIs have ranged from ecchymosis, hematoma, epistaxis, and petechiae to life-threatening hemorrhages. Patients should be cautioned about the risk of bleeding associated with the concomitant use of Pristiq and NSAIDs, aspirin, or other drugs that affect coagulation or bleeding. **Narrow-angle Glaucoma-**Mydriasis has been reported in association with Pristiq;



therefore, patients with raised intraocular pressure or those at risk of acute narrow-angle glaucoma (angle-closure glaucoma) should be monitored. **Activation of Mania/Hypomania**-During all MDD and VMS (vasomotor symptoms) phase 2 and phase 3 studies, mania was reported for approximately 0.1% of patients treated with Pristiq. Activation of mania/hypomania has also been reported in a small proportion of patients with major affective disorder who were treated with other marketed antidepressants. As with all antidepressants, Pristiq should be used cautiously in patients with a history or family history of mania or hypomania. **Cardiovascular/Cerebrovascular Disease**-Caution is advised in administering Pristiq to patients with cardiovascular, cerebrovascular, or lipid metabolism disorders [see *Adverse Reactions* (6.1)]. Increases in blood pressure and heart rate were observed in clinical studies with Pristiq. Pristiq has not been evaluated systematically in patients with a recent history of myocardial infarction, unstable heart disease, uncontrolled hypertension, or cerebrovascular disease. Patients with these diagnoses, except for cerebrovascular disease, were excluded from clinical studies. **Serum Cholesterol and Triglyceride Elevation**-Dose-related elevations in fasting serum total cholesterol, LDL (low density lipoprotein) cholesterol, and triglycerides were observed in the controlled studies. Measurement of serum lipids should be considered during treatment with Pristiq [see *Adverse Reactions* (6.1)]. **Discontinuation of Treatment with Pristiq**-Discontinuation symptoms have been systematically and prospectively evaluated in patients treated with Pristiq during clinical studies in Major Depressive Disorder. Abrupt discontinuation or dose reduction has been associated with the appearance of new symptoms that include dizziness, nausea, headache, irritability, insomnia, diarrhea, anxiety, fatigue, abnormal dreams, and hyperhidrosis. In general, discontinuation events occurred more frequently with longer duration of therapy. During marketing of SNRIs (Serotonin and Norepinephrine Reuptake Inhibitors) and SSRIs (Selective Serotonin Reuptake Inhibitors), there have been spontaneous reports of adverse events occurring upon discontinuation of these drugs, particularly when abrupt, including the following: dysphoric mood, irritability, agitation, dizziness, sensory disturbances (e.g., paresthesia, such as electric shock sensations), anxiety, confusion, headache, lethargy, emotional lability, insomnia, hypomania, tinnitus, and seizures. While these events are generally self-limiting, there have been reports of serious discontinuation symptoms. Patients should be monitored for these symptoms when discontinuing treatment with Pristiq. A gradual reduction in the dose rather than abrupt cessation is recommended whenever possible. If intolerable symptoms occur following a decrease in the dose or upon discontinuation of treatment, then resuming the previously prescribed dose may be considered. Subsequently, the physician may continue decreasing the dose, but at a more gradual rate [see *Dosage and Administration* (2.4) and *Adverse Reactions* (6.1) in full prescribing information]. **Renal Impairment**-In patients with moderate or severe renal impairment or end-stage renal disease (ESRD) the clearance of Pristiq was decreased, thus prolonging the elimination half-life of the drug. As a result, there were potentially clinically significant increases in exposures to Pristiq [see *Clinical Pharmacology* (12.6) in full prescribing information]. Dose adjustment (50 mg every other day) is necessary in patients with severe renal impairment or ESRD. The doses should not be escalated in patients with moderate or severe renal impairment or ESRD [see *Dosage and Administration* (2.2) in full prescribing information]. **Seizure**-Cases of seizure have been reported in premarketing clinical studies with Pristiq. Pristiq should be prescribed with caution in patients with a seizure disorder. **Hypotension**-Hypotension can occur as a result of treatment with SSRIs and SNRIs, including Pristiq. In many cases, this hypotension appears to be the result of the syndrome of inappropriate antidiuretic hormone secretion (SIADH). Elderly patients can be at greater risk of developing hypotension with SSRIs and SNRIs. Also, patients taking diuretics or who are otherwise volume depleted can be at greater risk [see *Use in Specific Populations* (8.5) and *Clinical Pharmacology* (12.6) in full prescribing information]. Discontinuation of Pristiq should be considered in patients with symptomatic hypotension and appropriate medical intervention should be instituted. **Coadministration of Drugs Containing Desvenlafaxine and Venlafaxine**-Desvenlafaxine is the major active metabolite of venlafaxine. Products containing desvenlafaxine and products containing venlafaxine should not be used concomitantly with Pristiq. **Interstitial Lung Disease and Eosinophilic Pneumonia**-Interstitial lung disease and eosinophilic pneumonia associated with venlafaxine (the parent drug of Pristiq) therapy have been rarely reported. The possibility of these adverse events should be considered in patients treated with Pristiq who present with progressive dyspnea, cough, or chest discomfort. Such patients should undergo a prompt medical evaluation, and discontinuation of Pristiq should be considered.

**ADVERSE REACTIONS: Clinical Studies Experience:** The most commonly observed adverse reactions in Pristiq-treated MDD patients in short-term fixed-dose studies (incidence  $\geq 5\%$  and at least twice the rate of placebo in the 50- or 100-mg dose groups) were nausea, dizziness, insomnia, hyperhidrosis, constipation, somnolence, decreased appetite, anxiety, and specific male sexual function disorders. **Adverse reactions reported as reasons for discontinuation of treatment:** The most common adverse reactions leading to discontinuation in at least 2% of the Pristiq-treated patients in the short-term studies, up to 8 weeks, were nausea (4%); dizziness, headache and vomiting (2% each); in the long-term study, up to 9 months, the most common was vomiting (2%). **Common adverse reactions in placebo-controlled MDD studies-** Table 3 in full PI shows the incidence of common adverse reactions that occurred in  $\geq 2\%$  of Pristiq-treated MDD patients at any dose in the 8-week, placebo-controlled, fixed-dose, premarketing clinical studies. In general, the adverse reactions were most frequent in the first week of treatment. **Cardiac disorders:** Palpitations, Tachycardia, Blood pressure increased; **Gastrointestinal disorders:** Nausea, Dry mouth, Diarrhea, Constipation, Vomiting; **General disorders and administration site conditions:** Fatigue, Chills, Feeling jittery, Asthenia; **Metabolism and nutrition disorders:** Decreased appetite, weight decreased; **Nervous system disorders:** Dizziness, Somnolence, Headache, Tremor, Paraesthesia, Disturbance in attention; **Psychiatric disorders:** Insomnia, Anxiety, Nervousness, Irritability, Abnormal dreams; **Renal and urinary disorders:** Urinary hesitation; **Respiratory, thoracic, and mediastinal disorders:** Yawning; **Skin and subcutaneous tissue disorders:** Hyperhidrosis, Rash; **Special Senses:** Vision blurred; **Mydriasis, Tinnitus, Dysgeusia;** **Vascular Disorders:** Hot flush. **Sexual function adverse reactions-**Table 4 shows the incidence of sexual function adverse reactions that occurred in  $\geq 2\%$  of Pristiq-treated MDD patients in any fixed-dose group (8-week, placebo-controlled, fixed and flexible-dose, premarketing clinical studies). **Men Only:** Anorgasmia, Libido decreased, Orgasm abnormal, Ejaculation delayed, Erectile dysfunction, Ejaculation disorder, Ejaculation failure, Sexual dysfunction; **Women Only:** Anorgasmia. **Other adverse reactions observed in premarketing clinical studies:** Other infrequent adverse reactions occurring at an incidence of  $<2\%$  in MDD patients treated with Pristiq were: **Immune system disorders** - Hypersensitivity. **Investigations** - Liver function test abnormal, blood prolactin increased. **Nervous system disorders** - Convulsion, syncope, extrapyramidal disorder. **Psychiatric disorders** - Depersonalization, hypomania. **Respiratory, thoracic and mediastinal disorders** - Epistaxis. **Vascular disorders** - Orthostatic hypotension. In clinical studies, there were uncommon reports of ischemic cardiac adverse events, including myocardial ischemia, myocardial infarction, and coronary occlusion requiring revascularization; these patients had multiple underlying cardiac risk factors. More patients experienced these events during Pristiq treatment as compared to placebo [see *Warnings and Precautions* (5.7)]. **Discontinuation events**-Adverse events reported in association with abrupt discontinuation, dose reduction or tapering of treatment in MDD clinical studies at a rate of  $\geq 5\%$  include dizziness, nausea, headache, irritability, insomnia, diarrhea, anxiety, abnormal dreams, fatigue, and hyperhidrosis. In general, discontinuation events occurred more frequently with longer duration of therapy [see *Dosage and Administration* (2.4) and *Warnings and Precautions* (5.9) in full prescribing information]. **Laboratory, ECG and vital sign changes observed in MDD clinical studies-** The following changes were observed in placebo-controlled, short-term, premarketing MDD studies with Pristiq. **Lipids**-Elevations in fasting serum total cholesterol, LDL (low density lipoproteins) cholesterol, and triglycerides occurred in the controlled studies. Some of these abnormalities were considered potentially clinically significant [see *Warnings and Precautions* (5.8)]. **Proteinuria**-Proteinuria, greater than or equal to trace, was observed in the fixed-dose controlled studies (see Table 6 in full prescribing information). This proteinuria was not associated with increases in BUN or creatinine and was generally transient. **ECG changes**-Electrocardiograms were obtained from 1,492 Pristiq-treated patients with major depressive disorder and 984 placebo-treated patients in clinical studies lasting up to 8 weeks. No clinically relevant differences were observed between Pristiq-treated and placebo-treated patients for QT, QTc, PR, and QRS intervals. In a thorough QTc study with prospectively determined criteria, desvenlafaxine did not cause QT prolongation. No difference was observed between placebo and desvenlafaxine treatments for the QRS interval. **Vital sign changes**-Table 7 summarizes the changes that were observed in placebo-controlled, short-term, premarketing studies with Pristiq in patients with MDD (doses 50 to 400 mg). Relative to placebo, Pristiq was associated with mean increase of up to 2.1 mm Hg in systolic blood pressure, 2.3 mm Hg in diastolic blood pressure, and 4.1 bpm with supine pulse. At the final on-therapy assessment in the 6-month, double-blind, placebo-controlled phase of a long-term study in patients who had responded to Pristiq during the initial 12-week, open-label phase, there was no statistical difference in mean weight gain between Pristiq- and placebo-treated patients. **DRUG INTERACTIONS: Central Nervous System (CNS)-Active Agents**-The risk of using Pristiq in combination with other CNS-active drugs has not been systematically evaluated. Consequently, caution is advised when Pristiq is taken in combination with other CNS-active drugs [see *Warnings and Precautions* (5.13)]. **Monoamine Oxidase Inhibitors (MAOIs)**-Adverse reactions, some of which were serious, have been reported in patients who have recently been discontinued from a monoamine oxidase inhibitor (MAOI) and started on antidepressants with pharmacological properties similar to Pristiq (SNRIs or SSRIs), or who have recently had SNRI or SSRI therapy discontinued prior to initiation of an MAOI [see *Contraindications* (4.2)]. **Serotonergic Drugs**-Based on the mechanism of action of Pristiq and the potential for serotonin syndrome, caution is advised when Pristiq is coadministered with other drugs that may affect the serotonergic neurotransmitter systems [see *Warnings and Precautions* (5.2)]. **Drugs that Interfere with Hemostasis** (e.g.,

**NSAIDs, Aspirin, and Warfarin)**-Serotonin release by platelets plays an important role in hemostasis. Epidemiological studies of case-control and cohort design have demonstrated an association between use of psychotropic drugs that interfere with serotonin reuptake and the occurrence of upper gastrointestinal bleeding. These studies have also shown that concurrent use of an NSAID or aspirin may potentiate this risk of bleeding. Altered anticoagulant effects, including increased bleeding, have been reported when SSRIs and SNRIs are coadministered with warfarin. Patients receiving warfarin therapy should be carefully monitored when Pristiq is initiated or discontinued. **Ethanol**-A clinical study has shown that desvenlafaxine does not increase the impairment of mental and motor skills caused by ethanol. However, as with all CNS-active drugs, patients should be advised to avoid alcohol consumption while taking Pristiq. **Potential for Other Drugs to Affect Desvenlafaxine-Inhibitors of CYP3A4 (ketoconazole)**-CYP3A4 is a minor pathway for the metabolism of Pristiq. Concomitant use of Pristiq with potent inhibitors of CYP3A4 may result in higher concentrations of Pristiq. **Inhibitors of other CYP enzymes**-Based on *in vitro* data, drugs that inhibit CYP isozymes 1A1, 1A2, 2A6, 2D6, 2C8, 2C9, 2C19, and 2E1 are not expected to have significant impact on the pharmacokinetic profile of Pristiq. **Potential for Desvenlafaxine to Affect Other Drugs-Drugs metabolized by CYP2D6 (desipramine)**-*In vitro* studies showed minimal inhibitory effect of desvenlafaxine on CYP2D6. Clinical studies have shown that desvenlafaxine does not have a clinically relevant effect on CYP2D6 metabolism at the dose of 100 mg daily. Concomitant use of desvenlafaxine with a drug metabolized by CYP2D6 can result in higher concentrations of that drug. **Drugs metabolized by CYP3A4 (midazolam)**-*In vitro*, desvenlafaxine does not inhibit or induce the CYP3A4 isozyme. Concomitant use of Pristiq with a drug metabolized by CYP3A4 can result in lower exposures to that drug. **Drugs metabolized by CYP1A2, 2A6, 2C8, 2C9 and 2C19**-*In vitro*, desvenlafaxine does not inhibit CYP1A2, 2A6, 2C8, 2C9, and 2C19 isozymes and would not be expected to affect the pharmacokinetics of drugs that are metabolized by these CYP isozymes. **P-glycoprotein Transporter**-*In vitro*, desvenlafaxine is not a substrate or an inhibitor for the P-glycoprotein transporter. The pharmacokinetics of Pristiq are unlikely to be affected by drugs that inhibit the P-glycoprotein transporter, and desvenlafaxine is not likely to affect the pharmacokinetics of drugs that are substrates of the P-glycoprotein transporter. **Electroconvulsive Therapy**-There are no clinical data establishing the risks and/or benefits of electroconvulsive therapy combined with Pristiq treatment. **USE IN SPECIFIC POPULATIONS: Pregnancy**-Patients should be advised to notify their physician if they become pregnant or intend to become pregnant during therapy. **Teratogenic effects** - **Pregnancy Category C**- There are no adequate and well-controlled studies of Pristiq in pregnant women. Therefore, Pristiq should be used during pregnancy only if the potential benefits justify the potential risks. **Non-teratogenic effects**-Neonates exposed to SNRIs (Serotonin and Norepinephrine Reuptake Inhibitors), or SSRIs (Selective Serotonin Reuptake Inhibitors), late in the third trimester have developed complications requiring prolonged hospitalization, respiratory support, and tube feeding. Such complications can arise immediately upon delivery. Reported clinical findings have included respiratory distress, cyanosis, apnea, seizures, temperature instability, feeding difficulty, vomiting, hypoglycemia, hypotonia, hypertonia, hyperreflexia, tremor, jitteriness, irritability, and constant crying. These features are consistent with either a direct toxic effect of SSRIs and SNRIs or, possibly, a drug discontinuation syndrome. It should be noted that, in some cases, the clinical picture is consistent with serotonin syndrome [see *Warnings and Precautions* (5.2)]. When treating a pregnant woman with Pristiq during the third trimester, the physician should carefully consider the potential risks and benefits of treatment [see *Dosage and Administration* (2.2)]. **Labor and Delivery**-The effect of Pristiq on labor and delivery in humans is unknown. Pristiq should be used during labor and delivery only if the potential benefits justify the potential risks. **Nursing Mothers**-Desvenlafaxine (O-desmethylvenlafaxine) is excreted in human milk. Because of the potential for serious adverse reactions in nursing infants from Pristiq, a decision should be made whether or not to discontinue nursing or to discontinue the drug, taking into account the importance of the drug to the mother. Only administer Pristiq to breastfeeding women if the expected benefits outweigh any possible risk. **Pediatric Use**-Safety and effectiveness in the pediatric population have not been established [see *Box Warning and Warnings and Precautions* (5.1)]. Anyone considering the use of Pristiq in a child or adolescent must balance the potential risks with the clinical need. **Geriatric Use**-Of the 3,292 patients in clinical studies with Pristiq, 5% were 65 years of age or older. No overall differences in safety or efficacy were observed between these patients and younger patients, but greater sensitivity of some older individuals cannot be ruled out. For elderly patients, possible reduced renal clearance of desvenlafaxine should be considered when determining dose [see *Dosage and Administration* (2.2) and *Clinical Pharmacology* (12.6) in full prescribing information]. **Renal Impairment**-In subjects with renal impairment the clearance of Pristiq was decreased. In subjects with severe renal impairment (24-hr CrCl  $<30$  mL/min) and end-stage renal disease, elimination half-lives were significantly prolonged, increasing exposures to Pristiq; therefore, dosage adjustment is recommended in these patients [see *Dosage and Administration* (2.2) and *Clinical Pharmacology* (12.6) in full prescribing information]. **Hepatic Impairment**-The mean  $t_{1/2}$  changed from approximately 10 hours in healthy subjects and subjects with mild hepatic impairment to 13 and 14 hours in moderate and severe hepatic impairment, respectively. No adjustment in starting dosage is necessary for patients with hepatic impairment.

**OVERDOSAGE: Human Experience with Overdosage**-There is limited clinical experience with desvenlafaxine succinate overdose in humans. In premarketing clinical studies, no cases of fatal acute overdose of desvenlafaxine were reported. The adverse reactions reported within 5 days of an overdose  $>600$  mg that were possibly related to Pristiq included headache, vomiting, agitation, dizziness, nausea, constipation, diarrhea, dry mouth, paresthesia, and tachycardia. Desvenlafaxine (Pristiq) is the major active metabolite of venlafaxine. Overdose experience reported with venlafaxine (the parent drug of Pristiq) is presented below; the identical information can be found in the *Overdosage* section of the venlafaxine package insert. In postmarketing experience, overdose with venlafaxine (the parent drug of Pristiq) has occurred predominantly in combination with alcohol and/or other drugs. The most commonly reported events in overdose include tachycardia, changes in level of consciousness (ranging from somnolence to coma), mydriasis, seizures, and vomiting. Electrocardiogram changes (e.g., prolongation of QT interval, bundle branch block, QRS prolongation), sinus and ventricular tachycardia, bradycardia, hypotension, rhabdomyolysis, vertigo, liver necrosis, serotonin syndrome, and death have been reported. Published retrospective studies report that venlafaxine overdose may be associated with an increased risk of fatal outcomes compared to that observed with SSRI antidepressant products, but lower than that for tricyclic antidepressants. Epidemiological studies have shown that venlafaxine-treated patients have a higher pre-existing burden of suicide risk factors than SSRI-treated patients. The extent to which the finding of an increased risk of fatal outcomes can be attributed to the toxicity of venlafaxine in overdose, as opposed to some characteristic(s) of venlafaxine-treated patients, is not clear. Prescriptions for Pristiq should be written for the smallest quantity of capsules consistent with good patient management, in order to reduce the risk of overdose. **Management of Overdosage**-Treatment should consist of those general measures employed in the management of overdose with any SSRI/SNRI. Ensure an adequate airway, oxygenation, and ventilation. Monitor cardiac rhythm and vital signs. General supportive and symptomatic measures are also recommended. Gastric lavage with a large-bore orogastric tube with appropriate airway protection, if needed, may be indicated if performed soon after ingestion or in symptomatic patients. Activated charcoal should be administered. Induction of emesis is not recommended. Because of the moderate volume of distribution of this drug, forced diuresis, dialysis, hemoperfusion, and exchange transfusion are unlikely to be of benefit. No specific antidotes for desvenlafaxine are known. In managing an overdose, consider the possibility of multiple drug involvement. The physician should consider contacting a poison control center for additional information on the treatment of any overdose. Telephone numbers for certified poison control centers are listed in the Physicians Desk Reference (PDR).

This brief summary is based on Pristiq Prescribing Information W10529C002, revised April 2008.

Wyeth®

© 2008, Wyeth Pharmaceuticals Inc., Philadelphia, PA 19101 232600-01

NEW

For major depressive disorder in adults

## New SNRI therapy. From the start: One dose. No titration.

- The major active metabolite of Effxor XR<sup>®</sup> (venlafaxine HCl)<sup>1</sup>
- One simple 50-mg dose, no need to titrate<sup>1</sup>
  - Dosage adjustment is necessary in patients with severe renal impairment or end-stage renal disease and is recommended when discontinuing therapy
- Discontinuation rate due to adverse events was comparable to placebo in clinical studies at 50 mg<sup>1</sup>

New  **Pristiq**<sup>™</sup>  
desvenlafaxine  
EXTENDED-RELEASE TABLETS

### IMPORTANT TREATMENT CONSIDERATIONS

PRISTIQ 50 mg is indicated for the treatment of major depressive disorder in adults.

#### WARNING: SUICIDALITY AND ANTIDEPRESSANT DRUGS

Antidepressants increased the risk compared to placebo of suicidal thinking and behavior (suicidality) in children, adolescents, and young adults in short-term studies of Major Depressive Disorder (MDD) and other psychiatric disorders. Anyone considering the use of PRISTIQ or any other antidepressant in a child, adolescent, or young adult must balance this risk with the clinical need. Short-term studies did not show an increase in the risk of suicidality with antidepressants compared to placebo in adults beyond age 24; there was a reduction in risk with antidepressants compared to placebo in adults aged 65 and older. Depression and certain other psychiatric disorders are themselves associated with increases in the risk of suicide. Patients of all ages who are started on antidepressant therapy should be monitored appropriately and observed closely for clinical worsening, suicidality, or unusual changes in behavior. Families and caregivers should be advised of the need for close observation and communication with the prescriber. PRISTIQ is not approved for use in pediatric patients.

#### Contraindications

- PRISTIQ is contraindicated in patients with a known hypersensitivity to PRISTIQ or venlafaxine.
- PRISTIQ must not be used concomitantly with an MAOI or within 14 days of stopping an MAOI. Allow 7 days after stopping PRISTIQ before starting an MAOI.

#### Warnings and Precautions

- All patients treated with antidepressants should be monitored appropriately and observed closely for clinical worsening, suicidality, and unusual changes in behavior, especially during the first few months of treatment and when changing the dose. Consider changing the therapeutic regimen, including possibly discontinuing the medication, in patients whose depression is persistently worse or includes symptoms of anxiety, agitation, panic attacks, insomnia, irritability, hostility, aggressiveness, impulsivity, akathisia, hypomania, mania, or suicidality that are severe, abrupt in onset, or were not part of the patient's presenting symptoms. Families and caregivers of patients being treated with antidepressants should be alerted about the need to monitor patients.
- Development of a potentially life-threatening serotonin syndrome may occur with SNRIs and SSRIs, including PRISTIQ, particularly with concomitant use of serotonergic drugs, including triptans, and with drugs that impair the metabolism of serotonin (including MAOIs). If concomitant use is clinically warranted, careful observation of the patient is advised, particularly during treatment initiation and dose increases. Concomitant use of PRISTIQ with serotonin precursors is not recommended.
- Patients receiving PRISTIQ should have regular monitoring of blood pressure since sustained increases in blood pressure were observed in clinical studies. Pre-existing hypertension should be controlled before starting PRISTIQ. Caution should be exercised in treating patients with pre-existing hypertension or other underlying conditions that might be compromised by increases in blood pressure. Cases of elevated blood pressure requiring immediate treatment have been reported. For patients who experience a sustained increase in blood pressure, either dose reduction or discontinuation should be considered.

- SSRIs and SNRIs, including PRISTIQ, may increase the risk of bleeding events. Concomitant use of aspirin, NSAIDs, warfarin, and other anticoagulants may add to this risk.
- Mydriasis has been reported in association with PRISTIQ; therefore, patients with raised intraocular pressure or those at risk of acute narrow-angle glaucoma (angle-closure glaucoma) should be monitored.
- PRISTIQ is not approved for use in bipolar depression. Prior to initiating treatment with an antidepressant, patients should be adequately screened to determine the risk of bipolar disorder.
- As with all antidepressants, PRISTIQ should be used cautiously in patients with a history or family history of mania or hypomania, or with a history of seizure disorder.
- Caution is advised in administering PRISTIQ to patients with cardiovascular, cerebrovascular, or lipid metabolism disorders. Increases in blood pressure and small increases in heart rate were observed in clinical studies with PRISTIQ. PRISTIQ has not been evaluated systematically in patients with a recent history of myocardial infarction, unstable heart disease, uncontrolled hypertension, or cerebrovascular disease.
- Dose-related elevations in fasting serum total cholesterol, LDL (low density lipoprotein) cholesterol, and triglycerides were observed in clinical studies. Measurement of serum lipids should be considered during PRISTIQ treatment.
- On discontinuation, adverse events, some of which may be serious, have been reported with PRISTIQ and other SSRIs and SNRIs. Abrupt discontinuation of PRISTIQ has been associated with the appearance of new symptoms. Patients should be monitored for symptoms when discontinuing treatment. A gradual reduction in dose (by giving 50 mg of PRISTIQ less frequently) rather than abrupt cessation is recommended whenever possible.
- Dosage adjustment (50 mg every other day) is necessary in patients with severe renal impairment or end-stage renal disease (ESRD). The dose should not be escalated in patients with moderate or severe renal impairment or ESRD.
- Products containing desvenlafaxine and products containing venlafaxine should not be used concomitantly with PRISTIQ.
- Hyponatremia may occur as a result of treatment with SSRIs and SNRIs, including PRISTIQ. Discontinuation of PRISTIQ should be considered in patients with symptomatic hyponatremia.
- Interstitial lung disease and eosinophilic pneumonia associated with venlafaxine (the parent drug of PRISTIQ) therapy have been rarely reported.

#### Adverse Reactions

- The most commonly observed adverse reactions in patients taking PRISTIQ vs placebo for MDD in short-term fixed-dose premarketing studies (incidence  $\geq 5\%$  and twice the rate of placebo in the 50-mg dose group) were nausea (22% vs 10%), dizziness (13% vs 5%), hyperhidrosis (10% vs 4%), constipation (9% vs 4%), and decreased appetite (5% vs 2%).

Reference: 1. Pristiq<sup>™</sup> (desvenlafaxine) Prescribing Information, Wyeth Pharmaceuticals Inc.

Please see brief summary of Prescribing Information on adjacent pages.

Effxor XR<sup>®</sup> is a registered trademark of Wyeth Pharmaceuticals Inc.

**Pristiq**<sup>™</sup>  
desvenlafaxine

**Wyeth**<sup>®</sup>

© 2008, Wyeth Pharmaceuticals Inc.  
Philadelphia, PA 19101 228251-01
