# THE AMERICAN JOURNAL OF PSYCHIATRY

---

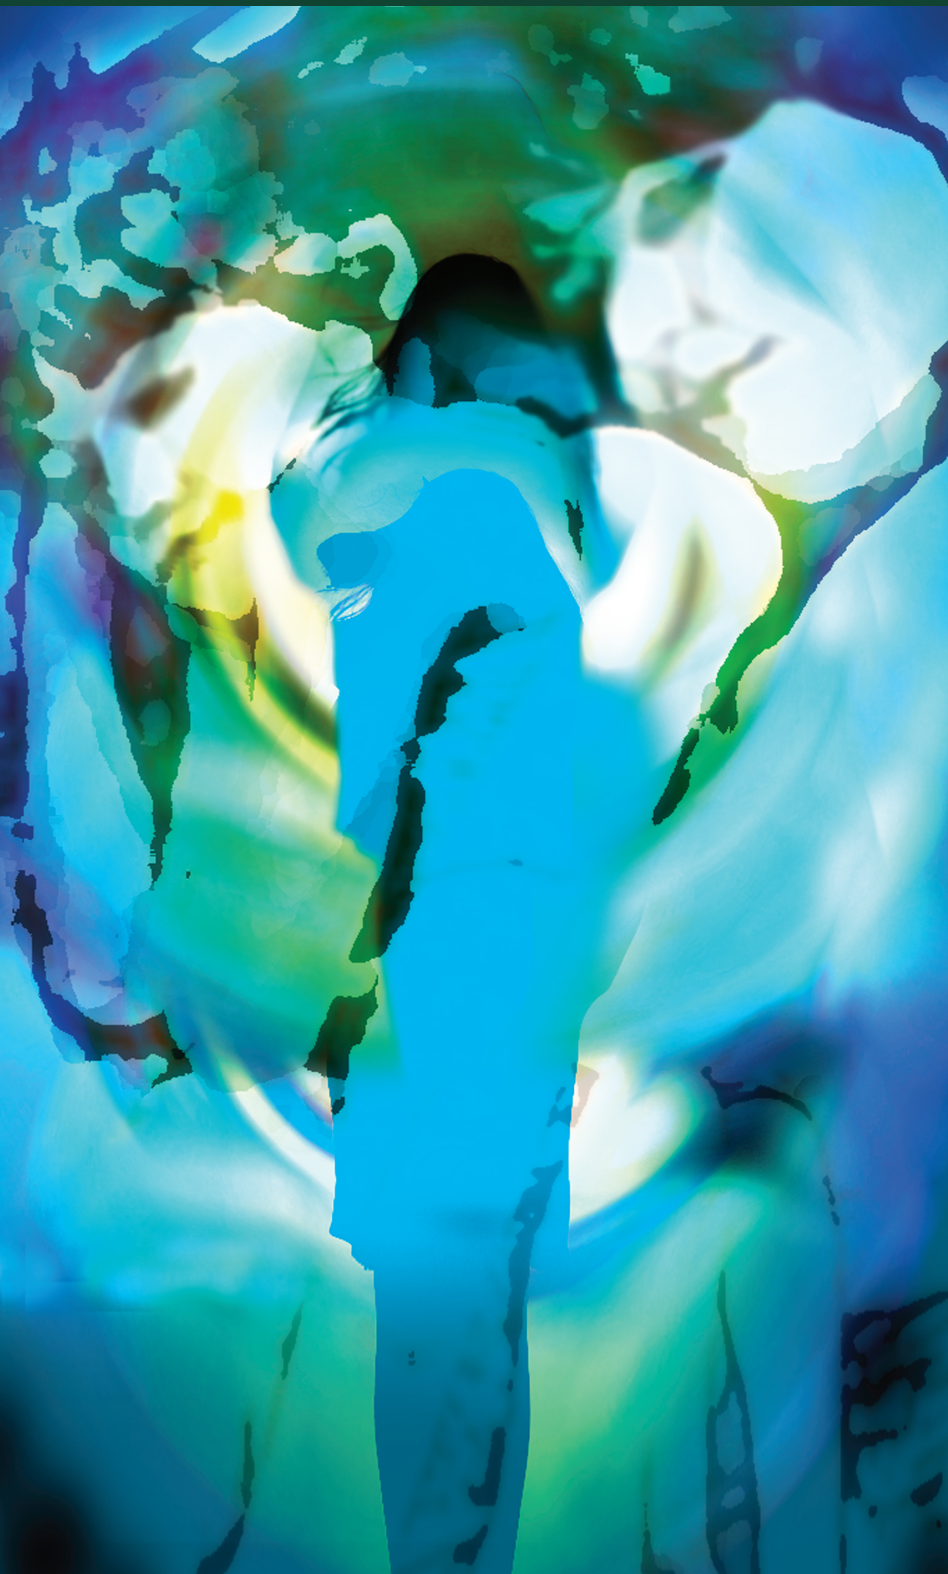

**Sleep Disturbance and Depression  
Recurrence in Community-Dwelling  
Older Adults: A Prospective Study**  
Hyong Jin Cho et al. 1543

◀ **Plasma Melatonin Circadian Rhythm  
Disturbances During Pregnancy and  
Postpartum in Depressed Women and  
Women With Personal or Family  
Histories of Depression**  
Barbara L. Parry et al. 1551

**Trauma, Resilience and Recovery in a  
High-Risk African-American Population**  
Tanya N. Alim et al. 1566

**Subunit-Selective Modulation of GABA  
Type A Receptor Neurotransmission  
and Cognition in Schizophrenia**  
David A. Lewis et al. 1585

**Continuing Medical Education** 1639

**December 2008**

**Volume 165 • Number 12**

---

Official Journal of the  
AMERICAN PSYCHIATRIC ASSOCIATION

---

[ajp.psychiatryonline.org](http://ajp.psychiatryonline.org)
