# THE AMERICAN JOURNAL OF PSYCHIATRY

## EDITOR-IN-CHIEF

Robert Freedman, M.D.

## DEPUTY EDITORS

David A. Lewis, M.D.

Robert Michels, M.D.

Daniel S. Pine, M.D.

Susan K. Schultz, M.D.

Carol A. Tamminga, M.D.

## EDITORIAL STAFF

### Editorial Director

Michael D. Roy

### Senior Editor/Features Writer

Jane Weaver, E.L.S.

### Senior Editors

John J. Guardiano, Ph.D.  
Leannah M. Harding, M.S., E.L.S.

### Editorial Manager

Molly Douglas

### Production Editor

Julie C. Blair

### Senior Graphic Designer

Jason Glance

### Assistant Editor

Angela Moore

### Editorial Assistant

Samantha Luck

### Assistants to the Editors

Lois Lilienthal  
Lindsay Karr  
Rachel Hogg  
Russell A. Scholl

## ASSOCIATE EDITORS

Kathleen T. Brady, M.D., Ph.D.

David A. Brent, M.D.

Linda Brzustowicz, M.D.

Cameron S. Carter, M.D.

Leon Eisenberg, M.D.

Howard H. Goldman,  
M.D., Ph.D.

Ellen Leibenluft, M.D.

Jeffrey A. Lieberman, M.D.

Robert C. Malenka, M.D., Ph.D.

Barbara Milrod, M.D.

Maria A. Oquendo, M.D.

Jerrold F. Rosenbaum, M.D.

A. John Rush, M.D.

Larry J. Siever, M.D.

Patricia Suppes, M.D., Ph.D.

Myrna M. Weissman, Ph.D.

## EDITORS EMERITI

Nancy C. Andreasen,  
M.D., Ph.D.

John C. Nemiah, M.D.

## FORMER EDITORS

Amariah Brigham, M.D.  
1844-1849

T. Romeyn Beck, M.D.  
1849-1854

John P. Gray, M.D.  
1854-1886

G. Alder Blumer, M.D.  
1886-1894

Richard Dewey, M.D.  
1894-1897

Henry M. Hurd, M.D.  
1897-1904

Edward N. Brush, M.D.  
1904-1931

Clarence B. Farrar, M.D.  
1931-1965

Francis J. Braceland, M.D.  
1965-1978

The American Journal of Psychiatry is online at [ajp.psychiatryonline.org](http://ajp.psychiatryonline.org)

# THE AMERICAN PSYCHIATRIC ASSOCIATION

1000 Wilson Blvd., Suite 1825, Arlington, VA 22209-3901  
(888) 357-7924 (toll-free inside the U.S. and Canada) / (703) 907-7300  
web site: [www.psych.org](http://www.psych.org) / e-mail: [apa@psych.org](mailto:apa@psych.org)

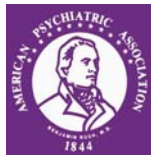

## OFFICERS 2008–2009

|                            |                                |
|----------------------------|--------------------------------|
| <b>President</b>           | Nada L. Stotland, M.D., M.P.H. |
| <b>President-Elect</b>     | Alan F. Schatzberg, M.D.       |
| <b>Vice-President</b>      | Carol A. Bernstein, M.D.       |
| <b>Secretary-Treasurer</b> | David Fassler, M.D.            |

## ASSEMBLY

|                      |                           |
|----------------------|---------------------------|
| <b>Speaker</b>       | Ronald M. Burd, M.D.      |
| <b>Speaker-Elect</b> | Gary S. Weinstein, M.D.   |
| <b>Recorder</b>      | Bruce A. Hershfield, M.D. |

## MEDICAL DIRECTOR'S OFFICE

|                                                                       |                                |
|-----------------------------------------------------------------------|--------------------------------|
| <b>Medical Director and CEO</b>                                       | James H. Scully, Jr., M.D.     |
| <b>Chief Executive Officer, American Psychiatric Publishing, Inc.</b> | Ronald E. McMillen             |
| <b>Executive Director, APIRE Division of Research</b>                 | Darrel A. Regier, M.D., M.P.H. |
| <b>Executive Director, American Psychiatric Foundation</b>            | Paul T. Burke                  |

## BOARD OF TRUSTEES

|                                 |                             |
|---------------------------------|-----------------------------|
| Thomas K. Ciesla, M.D.          | Pedro Ruiz, M.D.            |
| Mary Helen Davis, M.D.          | Steven S. Sharfstein, M.D.  |
| Melinda G. Fierros, M.D.        | Lauren M. Sitzer, M.D.      |
| Jeffrey L. Geller, M.D., M.P.H. | John Chapman Urbaitis, M.D. |
| Dilip V. Jeste, M.D.            | Amy M. Ursano, M.D.         |
| James E. Ninger, M.D.           | Sidney H. Weissman, M.D.    |
| Roger Peele, M.D.               | William M. Womack, M.D.     |
| Carolyn B. Robinowitz, M.D.     |                             |

## AMERICAN PSYCHIATRIC PUBLISHING, INC.

### BOARD OF DIRECTORS 2006–2009

|                            |                                      |
|----------------------------|--------------------------------------|
| <b>President and Chair</b> | Katharine Phillips, M.D.             |
| <b>Secretary</b>           | Donna M. Norris, M.D.                |
| <b>Treasurer</b>           | Joan A. Lang, M.D.                   |
| Dwight L. Evans, M.D.      | Pedro Ruiz, M.D.                     |
| John M. Oldham, M.D.       | Donna E. Stewart, M.D., F.R.C.P.(C.) |
| Laura W. Roberts, M.D.     |                                      |

### EX-OFFICIO MEMBERS

|                                              |                                |
|----------------------------------------------|--------------------------------|
| <b>APA President</b>                         | Nada L. Stotland, M.D., M.P.H. |
| <b>APA President-Elect</b>                   | Alan F. Schatzberg, M.D.       |
| <b>APA Secretary-Treasurer</b>               | David Fassler, M.D.            |
| <b>APA Medical Director and CEO</b>          | James H. Scully, Jr., M.D.     |
| <b>Editor-in-Chief, Psychiatric Services</b> | Howard Goldman, M.D.           |
| <b>Editor-in-Chief, Books</b>                | Robert E. Hales, M.D., M.B.A.  |

The American Journal of Psychiatry is online at [ajp.psychiatryonline.org](http://ajp.psychiatryonline.org)

# THE AMERICAN PSYCHIATRIC ASSOCIATION

## Chairpersons of Councils, Commissions, Committees, and Task Forces

### Standing Committees

#### Bylaws

John O. Gaston, M.D.

#### Elections

Kathleen M. Mogul, M.D.

#### Ethics

Wade C. Myers, M.D.

#### Finance and Budget

Jack W. Bonner III, M.D.

#### Audit

David Fassler, M.D.

#### Financial Oversight

Jack W. Bonner III, M.D.

#### Investment Oversight

Larry R. Faulkner, M.D.

#### Long-Term Financial Planning

Richard K. Harding, M.D.

#### Joint Reference

Alan F. Schatzberg, M.D.

#### Information Technology

John Luo, M.D.

#### Membership

Joseph Ezra V. Rubin, M.D.

#### Nominating

Carolyn B. Robinowitz, M.D.

#### Tellers

Michael Houston, M.D.

### Council on Addiction Psychiatry

Eric C. Strain, M.D.

#### Training and Education in Addiction Psychiatry

Syed P. Sattar, M.D.

#### Treatment Services for Patients With Addictive Disorders

Petros Levounis, M.D.

### Council on Advocacy and Public Policy

Robert Paul Cabaj, M.D.

#### Advocacy and Litigation Funding

Jeffrey L. Metzner, M.D.

#### Government Relations

Barry Bruce Perlman, M.D.

#### Public Affairs

William E. Callahan, M.D.

### Council on Aging

Robert Paul Roca, M.D.

#### Access and Effectiveness of Psychiatric Services for the Elderly

David Allen Casey, M.D.

#### Ethnic Minority Elderly

Maria D. Llorente, M.D.

#### Long-Term Care and Treatment for the Elderly

Laurence B. Luné, M.D.

### Council on Children, Adolescents, and Their Families

Michael Houston, M.D.

#### Developmental Disabilities

Joel D. Bregman, M.D.

#### Family Violence and Abuse

Gail E. Robinson, M.D.

#### Blanche F. Ittleson Research Award

Elizabeth B. Weller, M.D.

#### Juvenile Justice Issues

Louis J. Kraus, M.D.

#### Agnes Purcell McGavin Award

John E. Schowalter, M.D.

#### Infancy and Early Childhood

Jean M. Thomas, M.D.

#### Mental Health and Schools

Marcia J. Slattery, M.D.

#### Mental Health on College and University Campuses

Jerald Kay, M.D.

#### Violence Against Children

Sandra J. Kaplan, M.D.

### Council on Global Psychiatry

Lawrence Hartmann,  
M.D.

#### Misuse and Abuse of Psychiatry

Alan A. Stone, M.D.

#### Psychiatric Dimensions of Disasters

S. Arshad Husain, M.D.

### Council on Healthcare Systems and Financing

Anita Smith Everett, M.D.

#### APA/Business Relations

Stephen H. Heidel, M.D.

#### Managed Care

Paul Henry Wick, M.D.

#### Medicare Advisory

Edward Gordon, M.D.

#### Private Practice

Appointment pending

#### Psychiatry in the Workplace

Andrea G. Stolar, M.D.

#### Public Funding for Psychiatric Services

Laurence H. Miller, M.D.

#### Reimbursement for Psychiatric Care

Joseph T. English, M.D.

#### RBRVS, Codes and Reimbursement

Ronald M. Burd, M.D.

### Council on Medical Education and Lifelong Learning

Sandra Sexson, M.D.

#### APA/Bristol-Myers Squibb Fellowship Selection

David W. Preven, M.D.

#### APA/SAMHSA Minority Fellowship Selection and Advisory

Maria A. Oquendo, M.D.

#### APA/GlaxoSmithKline Fellowship Selection and Program

Leah Joan Dickstein, M.D.

#### APA/Lilly Products Resident Research Award

Charles L. Bowden, M.D.

#### CME/Lifelong Learning

Mark Hyman Rapaport,  
M.D.

#### Commercial Support

Michael D. Jibson, M.D.

#### Graduate Education

Sidney Herman Weissman,  
M.D.

#### History and Library

Laura D. Hirshbein, M.D.

#### Medical Student Education

Linda Faith Pessar, M.D.

#### Psychiatric Administration and Management

L. Mark Russakoff, M.D.

#### Residents and Fellows

Molly K. McVoy, M.D.

#### Scientific Program

Joseph A. Cheong, M.D.

#### Scientific Program Committee of the Institute on Psychiatric Services

Jacqueline M. Feldman, M.D.

#### Vestermark Award

Frederick G. Guggenheim,  
M.D.

### Council on Member and District Branch Relations

Jeffrey S. Akman, M.D.

#### Distinguished Service Award

Nada L. Stotland, M.D.,  
M.P.H.

#### Newsletter of the Year

Denis J. Milke, M.D.

#### Physician Health, Illness and Impairment

Joel J. Silverman, M.D.

### Council on Minority Health and Health Disparities

Sandra C. Walker, M.D.

#### American Indian, Alaska Native and Native Hawaiian Psychiatrists

Daniel L. Dickerson, D.O.

#### Asian-American Psychiatrists

Jacquelyn B. Chang, M.D.

#### Black Psychiatrists

Michele Reid, M.D.

#### Gay, Lesbian, and Bisexual Issues

Ellen Haller, M.D.

#### Hispanic Psychiatrists

Andres J. Pumariega, M.D.

#### International Medical Graduates

Marie C. Rigaud, M.D.

#### Religion, Spirituality, and Psychiatry

James W. Lomax II, M.D.

#### Women

Asha S. Mishra, M.D.

### Council on Psychiatry And Law

Patricia R. Recupero,  
M.D., J.D.

#### Confidentiality

William F. Haning, M.D.

#### Isaac Ray Award

J. Richard Ciccone, M.D.

#### Judicial Action

Jeffrey S. Janofsky, M.D.

#### Manfred S. Guttmacher Award

Marilyn Price, M.D., C.M.

#### Task Force on the Assessment of Violence Risk

Alec W. Buchanan, M.D.

#### Task Force on Forensic Outpatient Services

Steven K. Hoge, M.D.

### Council on Psychosomatic Medicine

Thomas N. Wise, M.D.

#### Access to Care and Reimbursement

Donna T. Chen, M.D.

#### Psychosomatic Education and Training

Mary Jane Massie, M.D.

#### Psychosomatic Medicine Research

Joel Edward Dimsdale, M.D.

### Council on Quality Care

Daniel K. Winstead, M.D.

#### AIDS

Francisco Fernandez, M.D.

#### Electronic Health Records

Laura J. Fochtman, M.D.

#### Patient Safety

Alfred Herzog, M.D.

#### Prevention of Mental Disorders and Promotion of Mental Health

William Rigby Beardslee,  
M.D.

#### Psychotherapy by Psychiatrists

Eric Martin Plakun, M.D.

#### Quality Indicators

Karen Pierce, M.D.

#### Standards and Survey Procedures

Jeanne L. Steiner, D.O.

#### Steering Committee on Practice Guidelines

John S. McIntyre, M.D.

### Council on Research

Jeffrey A. Lieberman, M.D.

#### Electroconvulsive and Other Electromagnetic Therapies

William M. McDonald, M.D.

#### Health Services Research

Javier I. Escobar, M.D.

#### Prevention of Mental Disorders and Promotion of Mental Health

William R. Beardslee, M.D.

#### Psychiatric Diagnosis and Assessment

Howard H. Goldman, M.D.

#### Research Awards

Stuart C. Yudofsky, M.D.

#### Research Ethics

Donna T. Chen, M.D.

#### Research on Psychiatric Treatments

Jeffrey A. Lieberman, M.D.

#### Research Training

Charles B. Nemeroff, M.D.

#### Task Force on Complementary and Alternative Medicine

Marlene Picus Freeman,  
M.D.

#### Task Force on DSM-V

David J. Kupfer, M.D.

### Council on Social Issues and Public Psychiatry

Carl Compton Bell, M.D.

#### Mental Healthcare for Veterans & Military Personnel & Their Families

Harold Stephen Kudler,  
M.D.

#### Persons With Mental Illness in the Criminal Justice System

Roberta E. Stellman, M.D.

#### Poverty, Homelessness, and Psychiatric Disorders

Ann L. Hackman, M.D.

#### Psychiatric Services Achievement Awards

Beatrice M. Kovaszny, M.D.
