# Read *The American Journal of Psychiatry* Online

Activate your FREE online access—It's as easy as 1, 2, 3!

To begin activation, go to [ajp.psychiatryonline.org](http://ajp.psychiatryonline.org) and click **SUBSCRIBE**

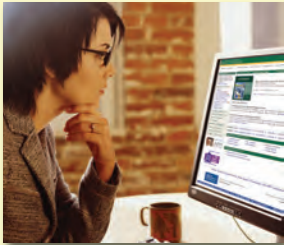

## For APA Members and Other Individuals:

1. Click on **ACTIVATE Your Member or Individual (Non-Member) Subscription**
2. Locate your 10-digit Member/Customer Number\* on your journal mailing label above your name. Be sure to enter all 10 digits, including any leading zeros.
3. Enter your number in the box and click **SUBMIT**.

On the next screen, you'll register your subscription and create a username and password that can be used immediately to access your online subscription.

\*If you are an APA Member, in most cases the number on your label will be your Member Number; if it is not, please enter your APA Member Number (with enough leading zeros to create 10 digits) instead of the number on your mailing label.

## For Institutions:

1. Click on **ACTIVATE Your Institutional Subscription**.
2. Locate your Customer Number on the journal mailing label above your name. Be sure to enter all 10-digits.
3. Enter your number in the box and click **SUBMIT**. On the next screen, you'll have the opportunity to enter IP addresses for your institution to provide seamless access for your patrons.

### Member/Customer Number

AJP3000056866 CAR-RT LOT88 C-015  
John Q. Sample  
Mental Health Professional  
1000 Wilson Blvd STE 1825  
Arlington VA 22209-3924 01654

## Benefits of Online Activation

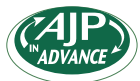

**AJP in Advance**—key research articles posted on the AJP website well in advance of their appearance in print.

**Back issue access to Volume 1, Issue 1**, starting with the *American Journal of Insanity* in 1844. (Available to institutions as a separate one-time purchase.)

**AJP CME**—interactive quizzes that offer *AMA PRA Category 1 Credits™* for selected articles from each issue (with paid subscription to the CME Course Program).

**AJP Audio**—MP3-format program summarizing findings from key articles from each issue.

**Residents' Journal**—the gateway to AJP articles and features that have most value to residents in their training.

**Precise and powerful searching** by author, keyword, and/or citation details—within any one journal, across the entire PsychiatryOnline journal collection, or across all HighWire journals.

**PubMed, CrossRef, and Google Scholar links**—from cited references to abstracts and full text; to similar articles; to other articles by the same lead authors.

**eTOCs**—Get advance email alerts with the table of contents from the latest issue.

For more information or if you cannot locate your customer number, please contact APPI Customer Service:  
Call: 1.800.368.5777 or 703.907.7322  
Email: [appi@psych.org](mailto:appi@psych.org)

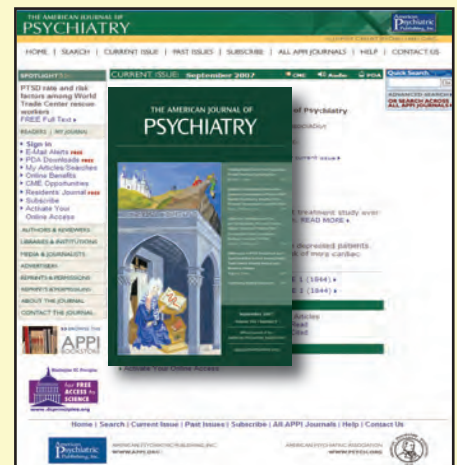

American  
**Psychiatric**  
Publishing, Inc.

The First and Last Word in Psychiatry

AH810

# New Feature for Residents!

## The American Journal of Psychiatry Residents' Journal

A FREE electronic publication produced specifically for psychiatry residents

The Residents' Journal contains special links to full text of the articles from the current *American Journal of Psychiatry* and to AJP Audio, a downloadable MP3 file featuring highlights from the issue. In addition, this e-mail bulletin contains two exclusive features:

### Journal Club Kit

A featured article presented with an overview discussing the reasons for its selection, discussion questions, and an editorial by a senior member of the field placing the article into clinical context.

### Educational Article

Case presentation that illustrates a major point in clinical practice or highlights unique treatment approaches.

Plus lively contributions from your fellow residents:

- Instructive cases
- Unique clinical or educational programs
- Perspectives on training and career development
- Discussions arising from journal club discussions

The American Journal of Psychiatry and the APA Committee of Residents and Fellows  
**Residents' Journal**  
November 2008: Volume 3, Issue 11

**Introduction**  
**Three Views on Resident Wellness**  
Paul O'Leary, M.D.  
Department of Psychiatry, University of Alabama at Birmingham

**Contents**  
Resident Wellness  
Introduction  
Paul O'Leary 1

**Interview**  
Carol A. Bernstein 1

**"He Against the Road": An LSU Resident's Perspective on Post-Hurricane Katrina, Residency, and Wellness**  
Nicholas G. Pejc 2

**Psychiatry Resident Wellness Survey: What Did We Learn?**  
Vincent J. Blanch & Paul O'Leary 3

**Dr. O'Leary & Dr. Yasin:** What motivated you to become involved with psychiatry education and administration?  
**Dr. Bernstein:** In many ways, this was not a decision by design but a way for me to pursue what I enjoy doing: mentoring young people, helping them to develop their careers, and facilitating connections. Prior to medical school, I obtained an M.A. in teaching. When I finished residency training at Columbia, I had the good fortune to be able to integrate clinical work with my interest in education and training. I worked part-time in an outpatient clinic, served as a liaison for the inpatient service on which residents rotated, and taught a small group section for the medical student behavioral science course. The following year, the position of Assistant Director for Medical Education became available. I expressed interest and was offered the position. I worked for 4 years in this capacity and really loved it. I subsequently became the Associate Residency Training Director at Columbia, after which I came to NYU to run the Resident Training Program, a role that naturally led to my greater interest in graduate medical education as a whole.

**Dr. O'Leary & Dr. Yasin:** For many years, you were the Residency Training Director at NYU/Bellevue. How did you manage to balance the program's demands with resident wellness?  
**Dr. Bernstein:** This reminds me of the old adage that life is 95% about "being there." For me, the most important part of my job as Training Director was to be in close communication with my residents at all times and to appreciate the struggles and challenges they encountered during training. I hope that my residents felt that my door was always open to them. Given the difficult demands placed on residents these days, I believe that a Training Director who is available and willing to listen

The Residents' Journal is sent free-of-charge to all psychiatry residents. Anyone interested in being included on the distribution list should contact Angela Moore, the Residents' Journal staff editor at [ajp@psych.org](mailto:ajp@psych.org) with "Subscribe to Residents' Journal" in the subject line.

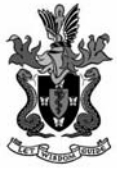

# THE BRITISH JOURNAL OF PSYCHIATRY

November 2008, VOL. 193

- A16 Editorial Board
- A18 Highlights of this issue
- Editorials**
- 351 **Alcohol-related dementia: a 21st-century silent epidemic?**  
S. Gupta and J. Warner
- 354 **Digit symbol coding and general cognitive ability in schizophrenia: worth another look?**  
D. Dickinson
- Review article**
- 357 **Effects of cannabis use on outcomes of psychotic disorders: systematic review**  
S. Zammit, T.H.M. Moore, A. Lingford-Hughes, T.R.E. Barnes, P.B. Jones, M. Burke, and G. Lewis
- Papers**
- 364 **Intellectual disability co-occurring with schizophrenia and other psychiatric illness: population-based study**  
V.A. Morgan, H. Leonard, J. Bourke, and A. Jablensky
- 372 **Wanting to die - poem**  
Anne Sexton
- 373 **Severity of depression and risk for subsequent dementia: cohort studies in China and the UK**  
R. Chen, Z. Hu, L. Wei, X. Qin, C. McCracken, and J.R. Copeland
- 377 **Attachment theory and the psychiatrist – patient relationship – in 100 words**  
J. Holmes
- 378 **Associations between childhood trauma, bullying and psychotic symptoms among a school-based adolescent sample**  
I. Kelleher, M. Harley, F. Lynch, L. Arseneault, C. Fitzpatrick, and M. Cannon
- 383 **Mood changes after delivery: role of the serotonin transporter gene**  
J. Sanjuan, R. Martin-Santos, L. Garcia-Esteve, J.M. Carot, R. Guillamat, A. Gutierrez-Zotes, I. Gornemann, F. Canellas, E. Baca-Garcia, M. Jover, R. Navines, V. Valles, E. Vilella, Y. de Diego, J.A. Castro, J.L. Ivorra, E. Gelabert, M. Guitart, A. Labad, F. Mayoral, M. Roca, M. Gratacos, J. Costas, J. van Os, and R. de Frutos
- 388 **A case of male anorexia with Klinefelter's syndrome, 22 years later - case report**  
C.P. Szabo
- 389 **Efficacy and safety of pregabalin in elderly people with generalised anxiety disorder**  
S. Montgomery, K. Chatamra, L. Pauer, E. Whalen, and F. Baldinetti
- 395 **Relationship between service ecology, special observation and self-harm during acute in-patient care: City-128 study**  
L. Bowers, R. Whittington, P. Nolan, D. Parkin, S. Curtis, K. Bhui, D. Hackney, T. Allan, and A. Simpson
- 402 **Case-control study of suicide in Karachi, Pakistan**  
M.M. Khan, S. Mahmud, M.S. Karim, M. Zaman, and M. Prince
- 406 **Suicide rates in people of South Asian origin in England and Wales: 1993–2003**  
K. McKenzie, K. Bhui, K. Nanchahal, and B. Blizard
- 410 **A measure of perceived stigma in people with intellectual disability**  
A. Ali, A. Strydom, A. Hassiotis, R. Williams, and M. King
- 416 **Involving patients in decisions during psychiatric consultations**  
C. Goss, F. Moretti, M.A. Mazzi, L. Del Piccolo, M. Rimondini, and C. Zimmermann
- Short reports**
- 422 **Longitudinal MRI study in schizophrenia patients and their healthy siblings**  
R.G.H. Brans, N.E.M. van Haren, G.C.M. van Baal, W.G. Staal, H.G. Schnack, R.S. Kahn, and H.E. Hulshoff Pol
- 424 **Time course of regional brain activation associated with onset of auditory/verbal hallucinations**  
R.E. Hoffman, A.W. Anderson, M. Varanko, J.C. Gore, and M. Hampson
- Columns**
- 426 **Correspondence**
- 428 **Book reviews**
- 432 **Contents of *Advances in Psychiatric Treatment***
- 433 **Contents of the *American Journal of Psychiatry***
- 434 **From the Editor's desk**

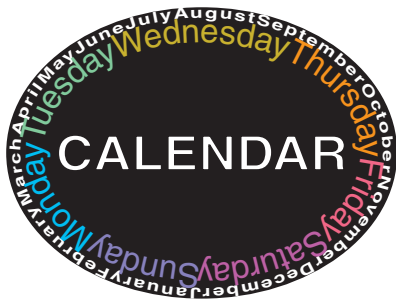

For free listing of your organization's official annual or regional meeting, please send us the following information: sponsor, location, inclusive dates, type and number of continuing education credits (if available), and the name, address, and telephone number of the person or group to contact for more information. In order for an event to appear in our listing, all notices and changes must be received at least 6 months in advance of the meeting and should be addressed to:

Calendar, American Journal of Psychiatry, 1000 Wilson Boulevard, Suite 1825, Arlington, VA 22209-3901, [jblair@psych.org](mailto:jblair@psych.org) (e-mail).

Because of space limitations, only listings of meetings of the greatest interest to Journal readers will be included.

## FEBRUARY 2009

**February 18–22**, Annual Meeting of the American Neuropsychiatric Association (ANPA), San Antonio, TX. Contact: ANPA office; (614) 447-2077 (tel), (614) 263-4366 (fax), [anpa@osu.edu](mailto:anpa@osu.edu) (e-mail), [www.anpaonline.org](http://www.anpaonline.org) (web site).

**February 25–March 1**, American College of Psychiatrists Annual Meeting, Tucson, AZ. Contact: 122 South Michigan Avenue, Suite 1360, Chicago, IL 60603; (312) 662-1020 (tel), (312) 662-1025 (fax), [angel@ACPsych.org](mailto:angel@ACPsych.org) (e-mail).

## MARCH

**March 5–8**, 22nd Annual Meeting of the American Association for Geriatric Psychiatry, Honolulu. Contact: AAGP, 7910 Woodmont Ave., Ste. 1050, Bethesda, MD 20814-3004; (301) 654-7850 (tel), (301) 654-4137 (fax), [www.aagpmeeting.org](http://www.aagpmeeting.org) (web site).

**March 27–29**, 3rd International Conference of The International Society of Interpersonal Psychotherapy (ISIPT), New York City, NY. Contact: 2009 ISIPT Planning Committee; [hv2009@columbia.edu](mailto:hv2009@columbia.edu) (e-mail).

## APRIL

**April 22–26**, Annual Meeting and Scientific Sessions of the Society of Behavioral Medicine, Montreal, Quebec. Contact: Society of Behavioral Medicine, (414) 918-3156 (tel), (414) 276-3349 (fax), [info@sbm.org](mailto:info@sbm.org) (e-mail).

## MAY

**May 15–17**, 5th International Conference on Alzheimer's Disease and Related Disorders in the Middle East, Limassol, Cyprus. Contact: Conference Secretariat;

1-773-784-8134 (tel), 1-773-782-6747 (tel), 1-208-575-5453 (fax), [meetings@worldeventsforum.com](mailto:meetings@worldeventsforum.com) (e-mail), [www.worldeventsforum.com/alz.htm](http://www.worldeventsforum.com/alz.htm) (web site).

**May 16–21**, 162nd Annual Meeting of the American Psychiatric Association, San Francisco, CA. Contact: Cathy Nash, APA Annual Meetings Dept., 1000 Wilson Blvd., Ste. 1825, Arlington, VA 22209; (703) 907-7822.

## JUNE

**June 16–20**, 2nd Thematic Conference on Legal and Forensic Psychiatry, Madrid, Spain. Contact: World Psychiatric Association, Alfredo Calcedo Barba, [forensicpsychiatry2009@gmail.com](mailto:forensicpsychiatry2009@gmail.com).

## AUGUST

**August 27–30**, Canadian Psychiatric Association 59th Annual Meeting, St. Johns, Newfoundland, Canada. Contact: 260-441 MacLaren Street, Ottawa, ON K2P 2H3, Canada; (800) 267-1555 (tel), (613) 234-9857 (fax), [conferene@cpa-apc.org](mailto:conferene@cpa-apc.org) (e-mail), [www.cpa-apc.org](http://www.cpa-apc.org) (web site).

## OCTOBER

**October 8–11**, 61st Institute on Psychiatric Services, American Psychiatric Association, New York, NY. Contact: Jill Gruber, APA Annual Meetings Dept., 1000 Wilson Blvd., Ste. 1825, Arlington, VA 22209; (703) 907-7815.

**October 27–November 1**, 56th Annual Meeting of the American Academy of Child and Adolescent Psychiatry, Honolulu, HI. Contact: AACAP, 3615 Wisconsin Avenue, N.W., Washington, DC 20016-3007; (202) 966-7300 (tel), (202) 966-2891 (fax), [meetings@aacap.org](mailto:meetings@aacap.org) (e-mail), [www.aacap.org](http://www.aacap.org) (web site).

## MAY 2010

**May 22–27**, 163rd Annual Meeting of the American Psychiatric Association, New Orleans, LA. Contact: Cathy Nash, APA Annual Meetings Dept., 1000 Wilson Blvd., Ste. 1825, Arlington, VA 22209; (703) 907-7822.

## OCTOBER

**October 14–17**, 62nd Institute on Psychiatric Services, American Psychiatric Association, Boston, MA. Contact: Jill Gruber, APA Annual Meetings Dept., 1000 Wilson Blvd., Ste. 1825, Arlington, VA 22209; (703) 907-7815.

## OCTOBER

**October 14–17**, 57th Annual Meeting of the American Academy of Child and Adolescent Psychiatry, Boston, MA. Contact: AACAP, 3615 Wisconsin Avenue, N.W., Washington, DC 20016-3007; (202) 966-7300 (tel), (202) 966-2891 (fax), [meetings@aacap.org](mailto:meetings@aacap.org) (e-mail), [www.aacap.org](http://www.aacap.org) (web site).

## MAY 2011

**May 14–19**, 164th Annual Meeting of the American Psychiatric Association, Honolulu, HI. Contact: Cathy Nash, APA Annual Meetings Dept., 1000 Wilson Blvd., Ste. 1825, Arlington, VA 22209; (703) 907-7822.

## OCTOBER

**October 18–23**, 58th Annual Meeting of the American Academy of Child and Adolescent Psychiatry, Toronto, Ontario. Contact: AACAP, 3615 Wisconsin Avenue, N.W., Washington, DC 20016-3007; (202) 966-7300 (tel), (202) 966-2891 (fax),

Continued on page A22

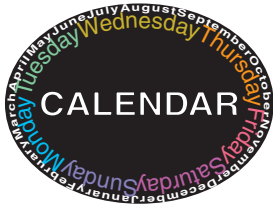

Continued from page A14

meetings@aacap.org (e-mail), www.aacap.org (web site).

**October 27–30**, 63rd Institute on Psychiatric Services, American Psychiatric Association, San Francisco, CA. Contact: Jill Gruber, APA Annual Meetings Dept., 1000 Wilson Blvd., Ste. 1825, Arlington, VA 22209; (703) 907-7815.

### Continuing Medical Education

Three articles in each issue provide an opportunity to earn up to 1 hour category 1 CME credit each by taking a course covering the content. Credit available online only with purchased subscription to AJP's CME program. Visit [cme.psychiatryonline.org](http://cme.psychiatryonline.org) for details.

### FREE AUDIO! Have You Heard?

You can listen to highlights of *The American Journal of Psychiatry* by downloading a monthly free .mp3 audio file from our website (<http://ajp.psychiatryonline.org/misc/audio.dtl>) or by subscribing to the AJP Audio podcast at iTunes or other feed reader.

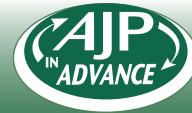

### GET AHEAD!

Subscribers can now view PDFs of all new research articles before print publication by clicking on the "AJP in Advance" logo at the AJP website ([ajp.psychiatryonline.org](http://ajp.psychiatryonline.org)).

## Coming in the January 2009 issue\*

### THE AMERICAN JOURNAL OF PSYCHIATRY

#### *Placebo Response in Randomized Controlled Trials of Antidepressants for Pediatric Major Depressive Disorder*

J.A. Bridge, B. Birmaher, S. Iyengar, R.P. Barbe, and D.A. Brent

#### *Childhood IQ and Adult Mental Disorders: A Test of the Cognitive Reserve Hypothesis*

K.C. Koenen, T.E. Moffitt, A.L. Roberts, L.T. Martin, L. Kubzansky, H. Harrington, R. Poulton, and A. Caspi

#### *Psychostimulant Treatment and the Developing Cortex in Attention Deficit Hyperactivity Disorder*

P. Shaw, W.S. Sharp, M. Morrison, K. Eckstrand, D.K. Greenstein, L.S. Clasen, A.C. Evans, and J.L. Rapoport

#### *Altered Striatal Activation Predicting Real-World Positive Affect in Adolescent Major Depressive Disorder*

E.E. Forbes, A.R. Hariri, S.L. Martin, J.S. Silk, D.L. Moyles, P.M. Fisher, S.M. Brown, N.D. Ryan, B. Birmaher, D.A. Axelson, and R.E. Dahl

\*Can't wait? Visit [ajp.psychiatryonline.org](http://ajp.psychiatryonline.org) and click the "AJP in Advance" logo to see all articles uploaded in advance of print!
